# Supplementary material for: Connor-Davidson Resilience Scale: validation study in a Portuguese sample
Source: PubMed Central journal article supplement — BMJ Open. 2019 Jun 27;9(6):e026836. doi: 10.1136/bmjopen-2018-026836 (PMC6609049; doi:10.1136/bmjopen-2018-026836), 2019-06-27
Supplement: bmjopen-2018-026836.draft_revisions.pdf [file bmjopen-2018-026836.draft_revisions.pdf]

# BMJ Open

BMJ Open is committed to open peer review. As part of this commitment we make the peer review history of every article we publish publicly available.

When an article is published we post the peer reviewers' comments and the authors' responses online. We also post the versions of the paper that were used during peer review. These are the versions that the peer review comments apply to.

The versions of the paper that follow are the versions that were submitted during the peer review process. They are not the versions of record or the final published versions. They should not be cited or distributed as the published version of this manuscript.

BMJ Open is an open access journal and the full, final, typeset and author-corrected version of record of the manuscript is available on our site with no access controls, subscription charges or pay-per-view fees (<http://bmjopen.bmj.com>).

If you have any questions on BMJ Open's open peer review process please email [info.bmjopen@bmj.com](mailto:info.bmjopen@bmj.com)

# BMJ Open

## Connor-Davidson Resilience Scale: Validation study in a Portuguese sample

|                               |                                                                                                                                                                                                                                                                                                                                                                                                                                                                           |
|-------------------------------|---------------------------------------------------------------------------------------------------------------------------------------------------------------------------------------------------------------------------------------------------------------------------------------------------------------------------------------------------------------------------------------------------------------------------------------------------------------------------|
| Journal:                      | <i>BMJ Open</i>                                                                                                                                                                                                                                                                                                                                                                                                                                                           |
| Manuscript ID                 | bmjopen-2018-026836                                                                                                                                                                                                                                                                                                                                                                                                                                                       |
| Article Type:                 | Research                                                                                                                                                                                                                                                                                                                                                                                                                                                                  |
| Date Submitted by the Author: | 21-Sep-2018                                                                                                                                                                                                                                                                                                                                                                                                                                                               |
| Complete List of Authors:     | Faria-Anjos, Joana; Universidade de Lisboa Faculdade de Psicologia, ; Instituto Nacional de Emergencia Medica IP, Heitor dos Santos, Maria; Universidade de Lisboa Faculdade de Medicina, Instituto de Medicina Preventiva e Saúde Pública & Instituto de Saúde Ambiental; Hospital Beatriz Angelo, Psiquiatria e Saúde Mental Ribeiro, Maria Teresa; Universidade de Lisboa Faculdade de Psicologia Moreira, Sergio; Faculdade de Psicologia da Universidade de Lisboa,, |
| Keywords:                     | MENTAL HEALTH, resilience, exploratory factor analysis, confirmatory factor analysis, convergent validity                                                                                                                                                                                                                                                                                                                                                                 |
|                               |                                                                                                                                                                                                                                                                                                                                                                                                                                                                           |

SCHOLARONE™  
Manuscripts

View Only

1  
2  
3  
4  
5  
6 Title: Connor-Davidson Resilience Scale: Validation study in a Portuguese sample  
7  
8  
9

10  
11 Authors:

12 Joana FARIA-ANJOS

13 Faculdade de Psicologia – Universidade de Lisboa

14 Alameda da Universidade; 1649-013 Lisboa – Portugal.

15  
16 Instituto Nacional de Emergência Médica – Portugal  
17  
18

19 Maria João HEITOR DOS SANTOS

20 Instituto de Medicina Preventiva e Saúde Pública & Instituto de Saúde Ambiental,

21 Faculdade de Medicina, Universidade de Lisboa, Portugal  
22

23 Departamento de Psiquiatria e Saúde Mental, Hospital Beatriz Ângelo, Loures, Portugal

24 Loures, Lisboa, 2674-514, Portugal  
25  
26  
27

28 Maria Teresa RIBEIRO

29 Faculdade de Psicologia – Universidade de Lisboa

30 Alameda da Universidade; 1649-013 Lisboa – Portugal.  
31  
32

33 Sérgio MOREIRA

34 Faculdade de Psicologia – Universidade de Lisboa

35 Alameda da Universidade; 1649-013 Lisboa – Portugal.  
36  
37  
38

39 Corresponding author:

40 Joana Faria-Anjos

41 Alameda da Universidade; 1649-013 Lisboa – Portugal. E-mail:

42 joana.f.anjos@gmail.com; Phone number: +351936010735.  
43  
44  
45

46 **Key-words:** mental health; resilience; confirmatory factorial analysis; exploratory

47 factorial analysis; convergent validity.  
48  
49  
50  
51  
52

53 **Word count:** 5057 words  
54  
55  
56  
57  
58  
59  
60

## Abstract

**Objective:** The objective of this paper is to evaluate the psychometric properties and convergent validity of first Portuguese version of the Connor- Davidson Resilience Scale (CD-RISC, 2003). **Participants:** Data sets came from two studies in Portugal, respectively, 476 participants from the Resilience Effect in Coping with Trauma (RECT) project and 405 participants from the Health Impact Assessment of Employment Strategies (HIAES) project. **Method and Results:** The original CD-RISC items were translated to Portuguese and used in a survey along with additional psychosocial and biomedical measures. An Exploratory Factorial Analysis (EFA) with each of the two samples revealed that the best solution in both samples had 3 factors - Self-Efficacy, Spirituality and Social Support. A Confirmatory Factor Analysis (CFA) using the two samples together and the 3 factors model specified on the EAF revealed, in absolute, a good overall fit and, comparatively, a better fit than the model with the original 5 factors. **Conclusions:** The bivariate correlations between the 3 factors and the variables used for the convergent validity are consistent with previous research and show significant correlations with physical activity, medication, mental health, subjective happiness and stress. There may be a protective and beneficial role of positive mental health and resilience on health outcomes.

## Article Summary

- Uses a Large sample of Portuguese participants studied with rigorous data collection protocols provide the right context to test the CD-RISC psychometric properties in the context of the Portuguese population.
- Applies sound validated data analysis methodologies (following Green and colleagues) for testing the psychometric properties.
- Makes available a tested (and validated by the original CD-RISC authors) translated version to the Portuguese speaking community.
- Has two different samples, resulting in using least convectional psychometric analysis.
- The two different samples also resulted in differences in test power for the convergent validity analysis.

## Funding statement

The Health Impact Assessment of Employment Strategies project (HIAES) was funded by The Office of the High Commissioner for Health followed by the General Health Direction.

## Competing interests

There are no competing interests.

## Introduction

Resilience can be described as a dynamic process of adaptively overcoming stress and adversity while maintaining normal psychological and physical functioning, and not merely the absence of psychopathology (e.g. Rutten et al., 2013). As an individual characteristic, resilience is likely influenced by external variables, such as adequate social support, that reduce risk for stress-related mental disorders by buffering the impact of stress (e.g. McCrory, De Brito, & Viding, 2010).

In a quantitative methodological review for searching, screening and appraising resilience scales quality, the Connor-Davidson Resilience Scale, the Resilience Scale for Adults and the Brief Resilience Scale received the best psychometric ratings (Windle, Bennett, & Noyes, 2011).

According to the perspective that resilience is a personal quality that reflects the ability to cope with stress, Connor and Davidson (2003) developed a brief self-report scale to quantify resilience. The original version of Connor-Davidson Resilience Scale (CD-RISC) has 25 self-rated items, each of them rated a 5-point scale from 0 ('not true at all') to 4 ('true nearly all the time'). Despite the absence of a proposed cut-off value, higher scores represent higher resilience. The CD-RISC has been developed with participants from different settings, including the general population, primary care outpatients, psychiatric inpatients, and clinical trial patients (Connor & Davidson, 2003). Due to this specificity of the scale studies, CD-RISC can be applied to different populations since it was not developed for a specific group (Karairmak, 2010). The original study demonstrates solid psychometric properties, with good internal consistency and test-retest reliability, with validity being demonstrated with other measures of stress and hardiness (Connor & Davidson, 2003). It suggests that resilience is modifiable and can improve with treatment. Further research on violent trauma shows

1  
2  
3 that survivors who exhibit better health or less distress from the trauma are more  
4  
5 resilient (Connor, Davidson, & Lee, 2003).  
6

7  
8 The CD-RISC has been translated into over fifty languages and has been tested in  
9  
10 several different contexts and specific populations (Davidson & Connor, 2017).  
11

12 Preliminary studies of the scale revealed that the CD-RISC has a multifactorial  
13  
14 structure. Connor and Davidson (2003) performed exploratory factor analysis, using the  
15  
16 adults sample from general population. The factor analyses yielded 5 factors, named as  
17  
18 *personal competence, high standards, and tenacity; trust in one's instinct, tolerance of*  
19  
20 *negative affect and strengthening effects of stress; positive acceptance of change and*  
21  
22 *secure relationships with others; control; spiritual influences.* Nevertheless, the CD-  
23  
24 RISC factor structure still needs to be clarified since subsequent studies found different  
25  
26 factor structures.  
27  
28

29  
30 Prince-Embury (2013) suggests that the instability of factor structure might have been  
31  
32 related to insufficient numbers of items covering various aspects of the original  
33  
34 construct and that factor structure differences would be expected in studies of groups  
35  
36 that varied culturally and demographically.  
37  
38

39 Therefore, the objective of this study was to evaluate the psychometric properties of the  
40  
41 CD-RISC Portuguese version with the aim of determining whether it can be used as a  
42  
43 reliable and valid tool to assess Portuguese population resilience.  
44  
45

## 46 47 48 **Method**

49  
50  
51 The study of CD-RISC psychometric properties and convergent validity was conducted  
52  
53 with data sets coming from two studies.  
54  
55  
56  
57  
58  
59  
60

1  
2  
3 The first data set comes from a research project on Resilience Effect in Coping with  
4 Trauma (RECT) in Portugal, conducted at the Faculty of Psychology of the University  
5 of Lisbon. This research project has been analyzed by the Ethical Committee of the  
6 University of Lisbon – Faculty of Psychology and obtained authorization to perform  
7 these studies. The second data set comes from a project on Health Impact Assessment of  
8 Employment Strategies (HIAES) in Portugal, within a collaboration protocol between  
9 the Institute of Preventive Medicine & Public Health (IMP&SP) of the Faculty of  
10 Medicine, University of Lisbon (FMUL), the National Institute of Health Doutor  
11 Ricardo Jorge, Public Institute (INSA, IP) and the former High Commissioner for  
12 Health (ACS), as a financial sponsor. Subsequently, this has also been supported by the  
13 Directorate-General of Health (DGS), still under the same protocol. The project Health  
14 Impact Assessment (HIA) of Employment Strategies was approved by two institutional  
15 ethical committees, the Ethics Committee for Health of the INSA, IP and the Ethics  
16 Committee for Health of the Lisbon / North Hospital Center of Faculty of Medicine of  
17 the University of Lisbon (CHLN/FMUL). It was also approved by the National  
18 Commission of Data Protection (CNPD). This research was conducted under the  
19 Helsinki declaration code of ethics.

### 40 **Patients and public involvement**

41 All the participants, from both research projects, were inform of the investigation  
42 details, accept to participate, and gave their signed informed consent.  
43  
44  
45  
46  
47  
48  
49  
50  
51  
52  
53  
54  
55  
56  
57  
58  
59  
60



## Sample

The RECT project has a convenience sample of 476 participants (44% female participants) comprised by master students, technical course of medical emergency students, and general population. Participants from the HIAES project consist of 405 workers (51% female participants) at a private mutualistic financial institution - Associação Mutualista Caixa Económica Montepio Geral (CEMG) – and is also a convenience non-probabilistic sample. Descriptive data from the two samples for general sociodemographic variables show noteworthy differences in age and education. Regarding the age of the participants, the mean for the RECT sample was 26 (SD=6.24), while the HIAES project's mean was 41 (SD=8.3). Concerning the education variable, the RECT project's sample was composed mostly of participants with a high school degree (58%), followed by middle school (27%) and graduate or higher (15%) degrees. The HIAES project's sample, however, had a higher percentage of participants with a graduate or higher degree (69%), followed by high school (30%) and middle school (1%) degrees.

## Instruments

Besides the CD-RISC Scale, we also collected a set of other measures relevant for each project objectives. In this section we only describe the CD-RISC and the measures relevant to test for convergent validity. It is important to note that different measures were collected in each of the samples and, also, for different groups within each sample.

### **Connor-Davidson Resilience Scale (CD-RISC)**

The CD-RISC (Connor & Davidson, 2003) is a scale developed to quantify psychological resilience and the clinical effects of the treatment of anxiety and depression. It is composed by 25 items measured in a 5 points scale (0 - not true to 4 - almost always true) and the original study describes five factors: the notion of personal competence, high standards, and tenacity; trust in one's instincts, tolerance of negative affect, and strengthening effects of stress; positive acceptance of change, and secure relationships; control; and finally, spiritual influences. Despite the Connor & Davidson's original study corroborating these five factors, latter studies have reported support for only one factor (e.g. Kararmak, 2010).

### **Additional measures**

A set of additional 8 measures were collected in these two studies. More specifically, in the RECT project the following measures were collected.

- Social Provisions Scale (SPS), an instrument that measures perceived social support (Cutrona & Russell, 1987). Here we used the Portuguese version developed by Moreira and Canaipa (2007).
- Satisfaction With Life Scale (SWLS), an instrument that measures life satisfaction based on the subjective judgement done by each person, accordingly to his own pattern of life satisfaction (Diener, Emmons, Larsen, & Griffin, 1985). We used the Portuguese adaptation of the scale conducted by Simões (1992).

- Perceived Stress Scale (PSS-10), a reduced version of PSS (Cohen, Kamarck, & Mermelstein, 1983; Cohen & Williamson, 1988), an instrument used to measure the perception of stress. We used the Portuguese adaptation of the PSS-10 described by Rocha (2009).
- Stress Vulnerability Questionnaire (23QVS), a measure of the individual's vulnerability to stress (Vaz-Serra, 2000).

In the HIAES project 4 additional measures were collected:

- Health and life styles (H&LS) information regarding perceived health (measured using a single item - "How would you classify your general health state during the last three months?" - and a three points Likert), the practice of physical exercise (measured using both a practice frequency and a practice quality scales) and medication consumption (measured using a dichotomous scale – yes versus no - for a set of fourteen clinical conditions).
- Biomedical indexes (BI) measured by means of blood samples, anthropometric parameters and blood pressure.
- Mental Health Inventory (MHI-5), the reduced version of the MHI Ribeiro 2001 (Veit & Ware, 1983) that measures psychological stress and well-being using 5 items and a frequency scale of 1, always, to 6, never. Here, we used a Portuguese adaptation of the MIH-5 described by Ribeiro (2001).
- Subjective Happiness Scale (SHS), a measure of subjective happiness originally developed by Lyubomirsky and Lepper (1999), composed by four items responded on a Likert 7 points scale. Again, we used a Portuguese version described by Pais-Ribeiro (2012).

## Procedure

### Translation and adaptation to the Portuguese Language

The CD-RISC items were translated a process of translation and back-translation from the original American scale (CD-RISC; 2003) by specialists in psychology and fluent in both Portuguese and English, and finally approved by the original CD-RISC authors.

### Survey procedure

For the RECT data a survey was conducted between April 2009 and May 2010.

Questionnaire application was in paper and pencil format and either face to face or administered in a classroom context. Part of the sample (421 participants) only answered to the CD-RISC scale. Another part of the sample (the remaining 55 participants) responded to all of the additional convergent validity measures.

For the HIAES data a survey was conducted between November 2012 and June 2013.

All participants answered the survey electronically, and to the Connor-Davidson Resilience Scale (CD-RISC) participants responded in paper and pencil format.

Additionally, for a subsample of 260, anthropometric measures and blood samples were also collected.

### Psychometric properties

The main objective of this paper was to study the psychometric characteristics of the Portuguese version of the CD-RISC. In this sense, we followed Green and colleagues' (2014) procedure where an Exploratory Factorial Analysis (EFA) was used to test the factorial structure of the original 25-item 5-factor solution version of the CD-RISC and

1  
2  
3 afterwards a Confirmatory Factor Analysis (CFA) was used to compare a proposed  
4 solution based on the EFA results with Connor and Davidson's original one. We note  
5 that this methodology used by Green and colleagues is particularly suited for our type of  
6 data because it allows to run a confirmatory test of the factorial structure of the scale  
7 with the complete sample but first taking in consideration the specific behavior of the  
8 items in each of the two samples.  
9

10  
11 More specifically, two independent EFAs were conducted in each one of the two data  
12 sets. In this analysis, the following criteria were taken into account. First, to determine  
13 the number of factors we considered the criteria an eigenvalue higher than 0.7. Second,  
14 for the interpretation of the items in each factor there were considered the oblimin  
15 rotated solutions once it is expected that the factors correlate among themselves.  
16 Additionally, for an item to be held for a particular factor communalities should be  
17 higher than 0.09, and loadings equal or higher to 0.32 and also cross-loadings lower to  
18 0.32 (Tabachnick & Fidell, 2007). Finally, the resulting items in a factor were tested for  
19 internal consistency using Cronbach alpha.  
20  
21

22  
23 Following the EFA, two CFAs were conducted using the complete sample to test and  
24 compare both the proposed solution as specified by EFA and the original 25-item 5-  
25 factor solution. The statistical quality of the models was assessed using two sets of  
26 measures. First, measures of the overall goodness of fit measures considering the  
27 following criteria: SRMR and RMSEA lower or equal to 0.08, Comparative Fit Index  
28 (CFI) and Tucker-Lewis Index (TLI) higher our equal to 0.90. Additionally, measures  
29 of the localized areas of strain with the following criteria: standardized residuals lower  
30 or equal to 2.58 and general modification indexes analysis lower or equal to 4.  
31  
32  
33  
34  
35  
36  
37  
38  
39  
40  
41  
42  
43  
44  
45  
46  
47  
48  
49  
50  
51  
52  
53  
54  
55  
56  
57  
58  
59  
60

### **Convergent validity**

Another aim of the present paper is to provide data for the convergent validity of the CD-RISC. The convergent validity is a form of validation that tests for the association between a construct measured by a scale and other measures that theoretically relate to this construct (Campbell & Fiske, 1959). For the convergent validity of the CD-RISC, variables used in the survey of the HIAES and RECT project were selected and bivariate correlations were computed. First, due to the sample dimension and the characteristics of the variables studied, only correlations with a p-value equal or lower than 0.01 are considered statistically significant. Second, for the interpretation we considered correlation values inferior to 0.20 as weak correlations, between 0.20 and 0.60 as moderate correlations, and higher than 0.60 strong correlations.

## **Results**

### **Psychometric validation**

#### **Exploratory Factorial Analysis**

A first set of EFAs were conducted on each data sample forcing the 25-items to the original 5-factor solution and, following Karairmak (2010) and Burns and Anstey (2010), to 3-factor and 1-factor solutions. The results on both data set indicated that none of the solutions replicated corresponding results. In fact, the factor structure for the 5 and 3-factor solutions did not hold, and for the three solutions tested several items revealed low communalities, low loadings and cross loadings in both samples. In line with this, items 5, 11, 12, 14, 17, 20 and 23 were excluded because of systematic problems in the different solutions. A second set of EFAs were conducted with the 18-items for each data sample. Once the original 5-factor and 3-factor solutions could no

1  
2  
3 longer be interpreted, we used the scree-plot to choose the best solution. The results on  
4  
5 both data sets showed that the best solution had 3 factors but items 22 and 25 still  
6  
7 revealed problematic. A final set of EFAs was conducted with the 16-items. Results  
8  
9 showed that the best solution in both samples had 3 factors with, respectively, 37% and  
10  
11 31% of explained variance (  
12  
13

14 Table 1

15  
16 Table 2  
17  
18  
19  
20  
21

22 and Table ). Factor 1 was the most representative factor, composed by 11 items and  
23  
24 explained, respectively, 20% and 16% of variance, and an alpha of 0.82 and 0.76. This  
25  
26 factor, that we labeled **Self-Efficacy**, describes individuals' beliefs about not only their  
27  
28 personal competence while dealing with challenging demands, but also their ability to  
29  
30 exercise control over their own functioning. Factor 2 was composed by 3 items and  
31  
32 explained, respectively, 9% and 8% of variance, and an alpha of 0.71 and 0.67. This  
33  
34 factor was named **Spirituality** and evaluates specific aspects of spirituality, namely the  
35  
36 belief that life has a purpose and that spiritual forces can influence earthly events.  
37  
38 Finally, Factor 3 was composed by 2 items and explained, respectively, 8% and 7% of  
39  
40 variance, and an alpha of 0.53 and 0.44. This factor refers to the perceived **Social**  
41  
42 **Support**, and evaluates how people perceive they can rely on others for emotional and  
43  
44 functional support. We note that the alphas for Self-Efficacy and Spirituality are above  
45  
46 0.7. Also, for the Social Support, once there were only two items, we used bivariate  
47  
48 correlations. Here the results show a moderate association between the two items.  
49  
50

51  
52 A descriptive analysis of the three subscales show that the average results for Self-  
53  
54 Efficacy are above the mid-point of the scale and have small standard deviations (SD)  
55  
56  
57  
58  
59  
60

on both RECT and HIAES samples, respectively, 2.92 (SD=0.54) and 3.03 (SD=0.40).

The same applies to the average results and standard deviations of the Spirituality subscale, respectively 2.64 (SD=0.91) and 2.47 (SD=0.84), and of the Social Support subscale, respectively 3.14 (SD=0.83) and 3.24 (SD=0.67).

Table 1

Table 2

### Confirmatory Factorial Analysis

CFA was conducted to test the model specified by EFA and to compare this model with the one suggested by Connor and Davidson's original five-factor solution. Considering the meaning of both the proposed three factors solution and the original five-factors solution, in both cases the CFAs were computed allowing for factors to correlate among themselves.

A preliminary analysis of the frequency distributions and statistics for skewness and kurtosis of CD-RISC show severe negative asymmetry of the data in most of the 25 items. To reduce the impact of the data distributions on the model computations, we log transformed all the data (note that the data was previously transformed to eliminate zero values by adding a constant, and afterwards all the results were inverted). The asymmetry of the resulting log transformed frequency distributions for the 25 items were significantly reduced and consequently used in the CFA.

The results for the proposed 16-item 3-factors solution reveal a good overall fit,  $\chi^2(101) = 368.64, p < .001$ ; SRMR = .05, RMSEA = .06 [.05, .06], CFI = .90, TLI = .89.



1  
2  
3 The analysis also shows that few standardized residuals are higher than 2.58 and,  
4 similarly, few modification indexes are above 4. Finally, all items were highly  
5 correlated with their factors, with all correlations between .40 and .77 and all  $ps < .001$ .  
6  
7

8  
9  
10 The results for the original 25-item 5-factor solution reveal a moderate overall fit, with  
11 both CFI and TLI measures slightly below the criteria,  $\chi^2(263) = 1219.08$ ,  $p < .001$ ;  
12 SRMR = .06, RMSEA = .07 [.06, .07], CFI = .82, TLI = .79. Additionally, the analysis  
13 also shows several standardized residuals above the criteria and, similarly, several  
14 modification indexes are above 4. All items were significantly correlated with their  
15 factors (all  $ps < .001$ ), but correlations ranged between a weak .20 and strong .70.  
16  
17  
18  
19  
20  
21

22 Overall, the proposed 16-item 3-factors solution had better performance in the CFA.  
23  
24  
25  
26  
27

### 28 **Convergent validity**

29  
30  
31 Six of the 8 measures used to test the convergent validity (i.e., SPS, SWLS, PSS-10,  
32 23QVS, MHI5 and SHS) were tested for the psychometric properties on their  
33 unidimensional versions (Table 3). Results all levels of explained variance are above  
34 40% all Cronbach alphas' above 80. The sole exception to these results is the 23QVS  
35 with a somewhat lower explained variance of 23% and alpha of 0.76. Additionally, for  
36 the H&LS we consider a single item on physical health (Phea) and two indexes, one on  
37 physical activity (Pact) using the average of the frequency of psychical activity and of  
38 commitment to the physical activity, and an index on medication consumption (Mcons),  
39 consisting in the sum of the answers for medication consumption regarding 14 clinical  
40 conditions. Finally, for the BI we computed an index to identify the presence of  
41 metabolic syndrome (Met) using the recommendations of the European Society of  
42  
43  
44  
45  
46  
47  
48  
49  
50  
51  
52  
53  
54  
55  
56  
57  
58  
59  
60

1  
2  
3 Cardiology (ESC, <http://www.escardio.org>) and an index for cardiovascular risk (Card)  
4 based on the norms of the Portuguese Society of Cardiology (SPC, [www.spc.pt](http://www.spc.pt)).  
5  
6

7  
8 Table 3  
9

10  
11 Table 4  
12  
13

14 Bivariate correlations were computed between each one of the three subscales,  
15 computed based on the 16-items in the CD-RISC, and each of the 8 measures described  
16 above and used to test the convergent validity (Table ). The results for the self-efficacy  
17 factor show a significant negative association with the two measures of stress  
18 considered - perceived stress ( $r=-0.32$ ) and vulnerability to stress ( $r=-0.34$ ). This result  
19 is consistent with the idea that people with high efficacy beliefs are able to overcome  
20 obstacles and focus on opportunities, and are more able to perceive stressful situations  
21 as challenging rather than as problematic events (Luszczynska, Gutiérrez-Doña, &  
22 Schwarzer, 2005). Also, the results show positive correlations between the self-efficacy  
23 factor and two additional variables, namely, subjective happiness ( $r=0.31$ ) and mental  
24 health ( $r=0.35$ ). Again, this is consistent with the literature where self-efficacy beliefs  
25 are considered to regulate positive and negative emotions. In this sense, people with  
26 higher self-efficacy beliefs are less distressed and feel more capable of dealing with the  
27 problematic situations (Bandura, 1997). Recent studies have found that self-efficacy is  
28 indeed positively correlated with happiness (e.g. Erozkán, Dogan, & Adiguzel, 2016)  
29 and satisfaction with life e.g. (Luszczynska et al., 2005). Finally, another set of striking  
30 correlations show, although moderately, the self-efficacy factor as a significant and  
31 negative correlation with physical health ( $r=-0.17$ ) and medication consumption ( $r=-$   
32  
33  
34  
35  
36  
37  
38  
39  
40  
41  
42  
43  
44  
45  
46  
47  
48  
49  
50  
51  
52  
53  
54  
55  
56  
57  
58  
59  
60

1  
2  
3 0.13)<sup>1</sup>. These last results constitute an extension of the findings where self-efficacy is  
4 associated with increased health and life satisfaction.  
5

6  
7 The results for the spirituality factor show only a marginal significant correlation with  
8 the vulnerability to stress measure ( $r=0.25$ ). This result is consistent with Connor et al.  
9 (2003) study with survivors of violent trauma, where spirituality is proposed as a coping  
10 strategy do deal with higher PTSD scores. Still, the fact that spirituality does not relate  
11 with any other variables is not consistent with the literature, where previous studies  
12 have successfully established correlations between spirituality and happiness (Martinez  
13 & Scott, 2014) and spirituality and life satisfaction (Etemadifar, Hosseiny, Ziraki,  
14 Omrani, & Alijanpoor, 2016). The absence of effects can be a result of the low  
15 statistical power due to the small sample size in the RECT sample. In fact, a post hoc  
16 power analysis shows that the power to detect a significant correlation of 0.20 at 0.05 in  
17 our sample is only 0.28.  
18  
19

20  
21 Finally, the results for the social support scale show a moderate significant correlation  
22 ( $r=0.48$ ) with the Social Provision Scale (Cutrona & Russell, 1987). Interestingly, this is  
23 the only significant correlation of the Social Provision Scale, which supports the  
24 assumptions that this factor is a specific dimension of resilience. Additionally, the social  
25 support scale is also correlated with the SHS ( $r=0.30$ ) and MHI5 ( $r=0.26$ ) scales. This  
26 result is consistent with the literature showing the strong impact of social support on  
27 happiness especially from closer social circles (Lee & Padilla, 2016). For instance, in a  
28 study with survivors from a natural disaster, the authors found that pre-disaster  
29 happiness and post-disaster social support were protective against the negative effect of  
30 the hurricane on survivors' post-disaster happiness (Calvo, Arcaya, Baum, Lowe, &  
31 Waters, 2015). Our results also show a marginal significant negative correlation  
32  
33

34  
35  
36  
37  
38  
39  
40  
41  
42  
43  
44  
45  
46  
47  
48  
49  
50  
51  
52  
53  
54  
55  
56  
57  
58  
59  
60  

---

<sup>1</sup> "Note that physical health is measured using a single item where the higher the value the lower the physical health reported".

1  
2  
3 between social support and vulnerability to stress ( $r=-0.24$ ). It is becoming increasingly  
4  
5 consensual that the lack of social support is an important risk factor in dealing with  
6  
7 stressful and adverse life events (Brewin, Andrews, & Valentine, 2000). Finally, our  
8  
9 results also show that social support correlates significantly with metabolic syndrome  
10  
11 ( $r=-0.13$ ) and cardiovascular risk ( $r=-0.10$ ), although the magnitude of both correlations  
12  
13 is weak. Although some of the literature describes a conflicting relation between social  
14  
15 support and physical health (Eaker, 2005), it appears that social support is negatively  
16  
17 associated with cardiovascular death and that it protects against recurrent events, the  
18  
19 existing research involving the predictive relation between social support/social  
20  
21 networks and incidence of disease, specifically cardiovascular disease.  
22  
23  
24  
25

## 26 **Discussion**

27  
28  
29 Resilience is a fundamental element of mental health, health assets, capabilities and  
30  
31 positive adaptation. It enables people both to cope with adversity and to reach their full  
32  
33 potential, and influences a wide range of outcomes at individual and community level,  
34  
35 including healthier lifestyles, better physical health, improved recovery from illness,  
36  
37 fewer limitations in daily living, higher educational attainment, greater productivity,  
38  
39 employment and earnings, better relationships with adults and with children, more  
40  
41 social cohesion and engagement and improved quality of life (Friedli & World Health  
42  
43 Organization, 2009). It is not a surprise that resilience has been extensively measured  
44  
45 and used to understand individual and social phenomena. In line with this, the objective  
46  
47 of this paper is to evaluate the psychometric properties and convergent validity of the  
48  
49 first Portuguese version of the Connor-Davidson Resilience Scale. In fact, despite the  
50  
51 importance of this construct, to date, there is no validated scale to measure resilience  
52  
53  
54  
55  
56  
57  
58  
59  
60

1  
2  
3 in the Community of Portuguese Language Countries (CPLP, n.d.), estimated to be  
4  
5 more than two hundred and seventy million people.  
6

7 To evaluate the psychometric properties and convergent validity of the first Portuguese  
8  
9 version of the Connor-Davidson Resilience Scale we used a translated version of the  
10  
11 CD-RISC that was validated using a back-translation procedure and review by the  
12  
13 original authors. Two sample sets were then studied with the translated scale, one in the  
14  
15 context of a project on Resilience Effect in Coping with Trauma, and another on the  
16  
17 context of a project on Health Impact Assessment of Employment Strategies.  
18  
19

20  
21 The psychometric characteristics were evaluated following Green and colleagues'  
22  
23 (2014) procedure using i) an Exploratory Factorial Analysis (EFA) to test the factorial  
24  
25 structure of the original 25-item 5-factor solution version of the CD-RISC and,  
26  
27 afterwards, ii) a Confirmatory Factor Analysis (CFA) to compare a proposed solution  
28  
29 based on the EFA results with Connor and Davidson's original one. The results do not  
30  
31 replicate the original five factors structure, instead, the results suggest a three factors  
32  
33 structure with self-efficacy, spirituality, and social support dimensions represented.  
34  
35

36 Although this result is not consistent with the original proposal from Connor and  
37  
38 Davidson, it is consistent with more recent studies (Karairmak, 2010; Xie, Peng, Zuo, &  
39  
40 Li, 2016). Consistent with this, the variability of factor structures found in CD-RISC  
41  
42 has been document and owed to methodological variations, idiosyncratic samples and,  
43  
44 importantly, to cross-cultural factors (Davidson & Connor, 2017). We also note that  
45  
46 similarly to the original study and to some of the following research, self-efficacy is the  
47  
48 factor that explains the greatest variance of the original items. Still, although the results  
49  
50 are important to understand the construct of resilience and how CD-RISC works as an  
51  
52 instrument measuring this construct in a Portuguese sample, we note that the resulting  
53  
54 scale should not be regarded as an improved version. In fact, we consider that improved  
55  
56  
57  
58  
59  
60

1  
2  
3 usage of this scale would come from prior testing of the factorial structure of the  
4  
5 original 25 items and comparison with the results of this paper and alike.  
6

7  
8 The results from the validation are, with one sole and justifiable exception, consistent  
9  
10 with evidence form the literature. In summary, regarding the self-efficacy factor, we  
11  
12 found associations with perceived stress, vulnerability to stress, subjective happiness  
13  
14 and mental health. Additionally, we also found associations with perceived physical  
15  
16 health and medication consumption, what we consider to be an extension of the findings  
17  
18 relating self-efficacy with health and life satisfaction. Regarding the spirituality factor,  
19  
20 we found only an association with vulnerability to stress. This result is not consistent  
21  
22 with the literature where spirituality has been related with stress, happiness and life  
23  
24 satisfaction. As mentioned, the absence of effects here are likely due to low test power.  
25  
26  
27 Finally, regarding the social support scale, we found association with the Social  
28  
29 Provision Scale, subjective happiness, mental health and vulnerability to stress.  
30  
31 Additionally, we also found an association with the two biomedical indexes used,  
32  
33 specifically, cardiovascular risk and metabolic syndrome. Resilience, through its self-  
34  
35 efficacy component, showed a protective effect on the extent of the myocardial  
36  
37 infarction, by affecting the inflammatory response (Arrebola-Moreno et al., 2014).  
38  
39 Emotional vitality, as part of healthy psychological functioning, may protect against risk  
40  
41 of coronary heart disease (CHD) (Kubzansky & Thurston, 2007). Resilience could have  
42  
43 life-saving effects! Prevention and intervention in CHD must involve not only measures  
44  
45 to reduce psychological distress but should also focus on promoting positive emotions.  
46  
47  
48  
49  
50  
51  
52  
53  
54  
55  
56  
57  
58  
59  
60

### Applications for the Portuguese version of the CD-RISC

Our study extends the literature that has provided support on the importance of the construct of resilience, and, more particularly, on the use of CD-RISC as a reliable measure of this construct. In fact, using a robust psychometric method we replicated more recent studies describing three main dimensions of resilience. Additionally, using a vast array of validated measures we also showed how these factors are associated with scales, indexes and even behavioral measures in a way that is consistent with the literature. Importantly, these associations support the distinctiveness of the three factors, with different factors relating, as expected, with some different convergent measures. Take for instance the strong correlation between the social support factor and the Social Provision Scale, and the stronger correlations between the self-efficacy factor and both stress and vulnerability to stress. A curious finding here is the specific association of self-efficacy with physical health and medication consumption and the association of social support with two biomedical indexes, cardiovascular risk and metabolic syndrome.

Most importantly, our study extends the possibility to measure and investigate resilience in Portuguese communities using a rigorously validated scale. In this sense, on the psychometric side, future studies with this community can explore further the three factors structure of the CD-RISC and test for the convergent validity with new samples. On this regard, we reinforce that a limitation of the current paper is the difference in test power between the two samples used to do the convergent validity. This is particularly important because the low test power sample (from REFC project) included important and unique validation measures and because the spirituality scale did not replicate entirely the findings in the literature. Finally, and considering both research and practice, future studies with the Portuguese communities can follow the factorial

1  
2  
3 structure found and validated. These studies can, again, provide additional support to  
4  
5 the theoretical and practical relevance of resilience and its dimensions as measured by  
6  
7 the CD-RISC.  
8  
9

10  
11  
12 Statistical code and dataset available from the figshare repository:

13  
14 <https://doi.org/10.6084/m9.figshare.7111676.v1>  
15  
16  
17  
18  
19  
20  
21  
22  
23  
24  
25  
26  
27  
28  
29  
30  
31

### 32 **References**

- 33  
34  
35  
36  
37 Arrebola-Moreno, A. L., Garcia-Retamero, R., Catena, A., Marfil-Álvarez, R.,  
38  
39 Melgares-Moreno, R., & Ramírez-Hernández, J. A. (2014). On the protective  
40  
41 effect of resilience in patients with acute coronary syndrome. *International*  
42  
43 *Journal of Clinical and Health Psychology*, *14*(2), 111-119.  
44  
45  
46 Bandura, A. (1997). Self-efficacy. *Harvard Mental Health Letter*, *13*(9), 4.  
47  
48 Brewin, C. R., Andrews, B., & Valentine, J. D. (2000). Meta-analysis of risk factors for  
49  
50 posttraumatic stress disorder in trauma-exposed adults. *Journal of Consulting*  
51  
52 *and Clinical Psychology*, *68*(5), 748-766. doi:10.1037/0022-006X.68.5.748  
53  
54 Burns, R. A., & Anstey, K. J. (2010). The Connor–Davidson Resilience Scale (CD-  
55  
56 RISC): Testing the invariance of a uni-dimensional resilience measure that is  
57  
58  
59



- 1  
2  
3 independent of positive and negative affect. *Personality and Individual*  
4 *Differences*, 48(5), 527-531. doi:10.1016/j.paid.2009.11.026  
5  
6  
7 Calvo, R., Arcaya, M., Baum, C. F., Lowe, S. R., & Waters, M. C. (2015). Happily ever  
8 after? Pre-and-post disaster determinants of happiness among survivors of  
9 Hurricane Katrina. *Journal of Happiness Studies*, 16(2), 427-442.  
10  
11  
12 doi:10.1007/s10902-014-9516-5  
13  
14  
15  
16 Campbell, D. T., & Fiske, D. W. (1959). Convergent and discriminant validation by the  
17 multitrait-multimethod matrix. *Psychological Bulletin*, 56(2), 81-105.  
18  
19  
20 doi:10.1037/h0046016  
21  
22  
23 Cohen, S., Kamarck, T., & Mermelstein, R. (1983). A Global Measure of Perceived  
24 Stress, 385.  
25  
26  
27 Cohen, S., & Williamson, G. (1988). Perceived stress in a probability sample of the  
28 United States. The social psychology of health: Claremont Symposium on  
29 applied social psychology. Edited by: Spacapan S, Oskamp S. 1988: Newbury  
30 Park, CA: Sage.  
31  
32  
33  
34  
35  
36 Connor, K. M., & Davidson, J. R. (2003). Development of a new resilience scale: the  
37 Connor-Davidson Resilience Scale (CD-RISC). *Depress Anxiety*, 18(2), 76-82.  
38  
39  
40 doi:10.1002/da.10113  
41  
42  
43 Connor, K. M., Davidson, J. R., & Lee, L.-C. (2003). Spirituality, Resilience, and Anger  
44 in Survivors of Violent Trauma: A Community Survey. *Journal of Traumatic*  
45 *Stress*, 16(5), 487.  
46  
47  
48  
49  
50  
51  
52  
53  
54  
55  
56  
57  
58  
59  
60
- Cutrona, C. E., & Russell, D. W. (1987). The provisions of social relationships and adaptation to stress. *Advances in personal relationships*, 1(1), 37-67.
- Davidson, J. R. & Connor, K. M. (2017) *Connor-Davidson Resilience Scale (CD-RISC) Manual*. Unpublished and partly accessible at [www.cd-risc.com](http://www.cd-risc.com).

- 1  
2  
3 Diener, E., Emmons, R. A., Larsen, R. J., & Griffin, S. (1985). The Satisfaction With  
4 Life Scale. *Journal of Personality Assessment*, 49(1), 71-75.  
5  
6 doi:10.1207/s15327752jpa4901\_13  
7  
8  
9 Eaker, E. D. (2005). Social Support and Physical Health: Understanding the Health  
10 Consequences of Relationships. *American Journal of Epidemiology*, 161(3),  
11 297-298. doi:10.1093/aje/kwi036  
12  
13  
14  
15 Erozkán, A., Dogan, U., & Adiguzel, A. (2016). Self-Efficacy, Self-Esteem, and  
16 Subjective Happiness of Teacher Candidates at the Pedagogical Formation  
17 Certificate Program. *Journal of Education and Training Studies*, 4(8), 72-82.  
18  
19  
20  
21 Etemadifar, S., Hosseiny, R. S., Ziraki, A., Omrani, A., & Alijanpoor, M. (2016). The  
22 Relationship Between Spiritual Well-Being and Life Satisfaction in Females  
23 With Infertility. *Women's Health Bull*, 3(4), e32344. doi:10.17795/whb-32344  
24  
25  
26  
27 Friedli, L., & World Health Organization. (2009). Mental health, resilience and  
28 inequalities.  
29  
30  
31  
32  
33 Green, K. T., Hayward, L. C., Williams, A. M., Dennis, P. A., Bryan, B. C., Taber, K.  
34 H., MIRECC Working Group, Davidson, J.R.T., Beckham, J.C., Calhoun, P.C.  
35 (2014). Examining the Factor Structure of the Connor–Davidson Resilience  
36 Scale (CD-RISC) in a Post-9/11 US Military Veteran Sample. *Assessment*,  
37 21(4), 443–451. doi:10.1177/1073191114524014  
38  
39  
40  
41  
42  
43  
44 Kararımk, Ö. (2010). Establishing the psychometric qualities of the Connor–Davidson  
45 Resilience Scale (CD-RISC) using exploratory and confirmatory factor analysis  
46 in a trauma survivor sample. *Psychiatry Research*, 179(3), 350-356.  
47  
48  
49  
50  
51  
52  
53  
54  
55  
56  
57  
58  
59  
60

- 1  
2  
3 Kubzansky, L. D., & Thurston, R. C. (2007). Emotional vitality and incident coronary  
4 heart disease: benefits of healthy psychological functioning. *Archives of General*  
5 *Psychiatry*, 64(12), 1393-1401.  
6  
7  
8  
9 Lee, D. S., & Padilla, A. M. (2016). Predicting South Korean university students'  
10 happiness through social support and efficacy beliefs. *International Journal for*  
11 *the Advancement of Counselling*, 38(1), 48-60. doi:10.1007/s10447-015-9255-2  
12  
13  
14  
15 Luszczynska, A., Gutiérrez-Doña, B., & Schwarzer, R. (2005). General self-efficacy in  
16 various domains of human functioning: Evidence from five countries.  
17 *International Journal of Psychology*, 40(2), 80-89.  
18  
19  
20  
21  
22  
23  
24  
25  
26  
27  
28  
29  
30  
31  
32  
33  
34  
35  
36  
37  
38  
39  
40  
41  
42  
43  
44  
45  
46  
47  
48  
49  
50  
51  
52  
53  
54  
55  
56  
57  
58  
59  
60
- Lyubomirsky, S., & Lepper, H. S. (1999). A Measure of Subjective Happiness:  
Preliminary Reliability and Construct Validation, 137.
- Martinez, C. T., & Scott, C. (2014). In Search of the Meaning of Happiness through  
Flow and Spirituality. *International Journal of Health, Wellness & Society*, 4(1),  
37-49.
- McCrory, E., De Brito, S. A., & Viding, E. (2010). Research review: the neurobiology  
and genetics of maltreatment and adversity. *J Child Psychol Psychiatry*, 51(10),  
1079-1095. doi:10.1111/j.1469-7610.2010.02271.x
- Moreira, J. M., & Canaipa, R. (2007). A escala de provisões sociais: Desenvolvimento e  
validação da versão portuguesa da 'Social Provisions Scale.' = Social Provision  
Scale, Portuguese version: Development and validation study. *Revista*  
*Iberoamericana de Diagnóstico y Evaluación Psicológica*, 24(2), 23-58.
- Pais-Ribeiro, J. L. (2012). Validação transcultural da Escala de Felicidade Subjectiva de  
Lyubomirsky e Lepper / Cross cultural validation of the Lyubomirsky and  
Lepper subjective happiness scale. *Psicologia, Saúde & Doenças*(2), 157.

- 1  
2  
3 Prince-Embury, S. (2013). The Connor-Davidson Resilience Scale. In S. Prince-  
4 Embury, D. H. Saklofske, S. Prince-Embury, & D. H. Saklofske (Eds.),  
5 *Resilience in children, adolescents, and adults: Translating research into*  
6 *practice*. (pp. 161-166). New York, NY, US: Springer Science + Business  
7  
8  
9  
10  
11 Media.
- 12  
13 Ribeiro, J. L. P. (2001). Mental Health Inventory: Um estudo de adaptação à população  
14 portuguesa. *Psicologia, Saúde & Doenças*, 2(1), 77-99.
- 15  
16  
17  
18 Rocha, P. (2009). Família e Trabalho: (Des)Equilíbrios que orientam a (In)Satisfação.  
19 Valor do Apoio Social e da Vinculação. Tese de Mestrado em Psicologia (Stress  
20 e Bem-Estar), FPCE, UL.
- 21  
22  
23  
24 Rutten, B. P., Hammels, C., Geschwind, N., Menne-Lothmann, C., Pishva, E., Schruers,  
25 K., . . . Wichers, M. (2013). Resilience in mental health: linking psychological  
26 and neurobiological perspectives. *Acta Psychiatr Scand*, 128(1), 3-20.  
27  
28  
29  
30  
31  
32  
33  
34  
35  
36  
37  
38  
39  
40  
41  
42  
43  
44  
45  
46  
47  
48  
49  
50  
51  
52  
53  
54  
55  
56  
57  
58  
59  
60
- doi:10.1111/acps.12095
- Simões, A. (1992). Ulterior validação de uma escala de satisfação com a vida (SWLS).  
*Revista Portuguesa de Pedagogia*, 26(3), 503-515.
- Tabachnick, B. G., & Fidell, L. S. (2007). *Using multivariate statistics*: Boston :  
Pearson and Allyn and Bacon. cop. 2007. 5th ed.
- Vaz-Serra, A. (2000). Construção de uma escala para avaliar a vulnerabilidade ao  
Stress: a 23 QVS.
- Veit, C. T., & Ware, J. E. (1983). The structure of psychological distress and well-being  
in general populations. *Journal of Consulting & Clinical Psychology*, 51, 730-  
742. doi:10.1037/0022-006X.51.5.730

1  
2  
3 Windle, G., Bennett, K. M., & Noyes, J. (2011). A methodological review of resilience  
4 measurement scales. *Health Qual Life Outcomes*, 9, 8. doi:10.1186/1477-7525-  
5 9-8  
6  
7  
8

9 Xie, Y., Peng, L., Zuo, X., & Li, M. (2016). The Psychometric Evaluation of the  
10 Connor-Davidson Resilience Scale Using a Chinese Military Sample. *PLoS*  
11 *ONE*, 11(2), 1-10. doi:10.1371/journal.pone.0148843  
12  
13  
14  
15  
16  
17  
18  
19  
20  
21  
22  
23  
24  
25  
26  
27  
28

29 Table 1. EFA results for the 16-item 3-factor solution in the RECT.  
30  
31

| Items / Explained variance | Self-Efficacy | Spirituality | Social Support |
|----------------------------|---------------|--------------|----------------|
| 19                         | 0.65          | 0.05         | 0.11           |
| 24                         | 0.47          | 0.20         | 0.10           |
| 15                         | 0.57          | -0.01        | 0.08           |
| 18                         | 0.52          | -0.07        | 0.06           |
| 7                          | 0.53          | -0.01        | 0.28           |
| 8                          | 0.56          | 0.08         | 0.11           |
| 1                          | 0.52          | 0.04         | 0.14           |
| 16                         | 0.53          | 0.01         | 0.14           |
| 4                          | 0.61          | 0.14         | 0.00           |
| 6                          | 0.39          | 0.16         | 0.25           |

|    |       |      |      |
|----|-------|------|------|
| 10 | 0.35  | 0.20 | 0.11 |
| 9  | 0.10  | 0.69 | 0.08 |
| 21 | 0.14  | 0.60 | 0.28 |
| 3  | -0.06 | 0.69 | 0.02 |
| 2  | 0.18  | 0.13 | 0.58 |
| 13 | 0.17  | 0.16 | 0.82 |

Table 2. EFA results for the 16-item 3-factor solution in the HIAES sample.

| Items / Explained variance | Self-Efficacy | Spirituality | Social Support |
|----------------------------|---------------|--------------|----------------|
| 19                         | 0.58          | -0.07        | 0.13           |
| 24                         | 0.57          | 0.02         | 0.09           |
| 15                         | 0.56          | -0.04        | 0.07           |
| 18                         | 0.52          | -0.07        | 0.07           |
| 7                          | 0.51          | 0.08         | 0.02           |
| 8                          | 0.48          | 0.04         | 0.08           |
| 1                          | 0.43          | 0.06         | 0.27           |
| 16                         | 0.43          | 0.08         | 0.04           |
| 4                          | 0.38          | 0.04         | 0.13           |

|    |       |      |      |
|----|-------|------|------|
| 6  | 0.33  | 0.12 | 0.05 |
| 10 | 0.33  | 0.19 | 0.19 |
| 9  | 0.08  | 0.72 | 0.00 |
| 21 | 0.09  | 0.60 | 0.07 |
| 3  | -0.06 | 0.59 | 0.13 |
| 2  | 0.09  | 0.06 | 0.76 |
| 13 | 0.21  | 0.14 | 0.54 |

Table 3. Descriptive of the measures used to test the convergent validity.

|        | M     | SD   | n   |
|--------|-------|------|-----|
| SPS    | 8.75  | 9.36 | 53  |
| SWLS   | 24.72 | 5.26 | 54  |
| PSS-10 | 14.51 | 5.49 | 55  |
| 23QVS  | 28.67 | 9.44 | 55  |
| H&LS   |       |      |     |
| Phea   | 1.38  | .52  | 405 |
| Pact   | 3.14  | 1.45 | 405 |
| Mcons  | 2.58  | 1.67 | 405 |

|       |       |       |     |
|-------|-------|-------|-----|
| BI    |       |       |     |
| Met   | .12   | .32   | 260 |
| Card  | 3.31  | 2.03  | 405 |
| MHI-5 | 68.91 | 18.97 | 405 |
| SHS   | 5.24  | 1.08  | 405 |

Table 4. Bivariate correlations between CD-RISC and the measures used to test the convergent validity.

|                   | 1      | 2     | 3     |
|-------------------|--------|-------|-------|
| 1. Self-Efficacy  | -      | .13** | .33** |
| 2. Spirituality   | .13**  | -     | .21** |
| 3. Social Support | .33**  | .21** | -     |
| H&LS - Phea       | -.16** | -.01  | -.09  |
| H&LS - Pact       | .08    | .00   | .08   |
| H&LS - Mcons      | -.13** | .08   | -.04  |
| BI - Met          | -.04   | .02   | -.13* |



|           |       |                  |                   |
|-----------|-------|------------------|-------------------|
| BI - Card | .07   | .01              | -.10*             |
| MHI-5     | .35** | .02              | .26**             |
| SHS       | .31** | .09              | .30**             |
| SPS       | .16   | -.13             | .48**             |
| SWLS      | .28*  | .10              | .11               |
| PSS-10    | -.32* | .14              | .10               |
| 23QVS     | -.34* | .25 <sup>+</sup> | -.24 <sup>+</sup> |

<sup>+</sup> p<0.06; \* p<0.05; \*\*p<0.01

**Author's contribution**

Faria-Anjos, Joana

Responsible for the CD-RISC scale translation process; substantial contribution to the conception and design of the work, acquisition, analysis and interpretation of data; drafting the work; agreement to be accountable for all aspects of the work related with integrity of the data analysis and results reporting; and final approval of the version to be published.

Accountable for the following sections: Introduction, Method, Results and Discussion.

Heitor, Maria João

Substantial contribution to the conception and design of the work, acquisition, analysis and interpretation of data; drafting the work; agreement to be accountable for all aspects of the work related with integrity of the data analysis and results reporting; and final approval of the version to be published.

Accountable for the following sections: Introduction, Method, Results and Discussion.

Ribeiro, Maria Teresa

Substantial contribution to the conception and design of the work, acquisition, analysis and interpretation of data; revising the work critically; agreement to be accountable for all aspects of the work related with integrity of the data analysis and results reporting; and final approval of the version to be published.

Accountable for the following sections: Introduction, Method, Results and Discussion.

1  
2  
3  
4  
5  
6  
7       Moreira, Sérgio

8  
9       Substantial contributions to the analysis and interpretation of data for the work; drafting  
10       the work and revising it critically; agreement to be accountable for all aspects of the  
11       work related with integrity of the data analysis and results reporting; and final approval  
12       of the version to be published.  
13  
14  
15

16       Accountable for the following sections: Method, Results and Discussion.  
17  
18  
19

20  
21  
22  
23       **Acknowledgments:** We thank Carla Crespo and Maria Violante Doria for their support  
24       in the CD-RISC scale translation process, and also to all the colleagues and institutions  
25       that supported us in the data collection (namely, Joana Carreiras and Susana Oliveira).  
26  
27

28       We thank Professor Jonathan Davidson for his helpful feedback throughout this process  
29       of paper construction.  
30  
31  
32  
33  
34  
35  
36  
37  
38  
39  
40  
41  
42  
43  
44  
45  
46  
47  
48  
49  
50  
51  
52  
53  
54  
55  
56  
57  
58  
59  
60

# BMJ Open

## Connor-Davidson Resilience Scale: Validation study in a Portuguese sample

|                                 |                                                                                                                                                                                                                                                                                                                                                                                                                                                                           |
|---------------------------------|---------------------------------------------------------------------------------------------------------------------------------------------------------------------------------------------------------------------------------------------------------------------------------------------------------------------------------------------------------------------------------------------------------------------------------------------------------------------------|
| Journal:                        | <i>BMJ Open</i>                                                                                                                                                                                                                                                                                                                                                                                                                                                           |
| Manuscript ID                   | bmjopen-2018-026836.R1                                                                                                                                                                                                                                                                                                                                                                                                                                                    |
| Article Type:                   | Research                                                                                                                                                                                                                                                                                                                                                                                                                                                                  |
| Date Submitted by the Author:   | 17-Jan-2019                                                                                                                                                                                                                                                                                                                                                                                                                                                               |
| Complete List of Authors:       | Faria-Anjos, Joana; Universidade de Lisboa Faculdade de Psicologia, ; Instituto Nacional de Emergencia Medica IP, Heitor dos Santos, Maria; Universidade de Lisboa Faculdade de Medicina, Instituto de Medicina Preventiva e Saúde Pública & Instituto de Saúde Ambiental; Hospital Beatriz Angelo, Psiquiatria e Saúde Mental Ribeiro, Maria Teresa; Universidade de Lisboa Faculdade de Psicologia Moreira, Sergio; Faculdade de Psicologia da Universidade de Lisboa,, |
| <b>Primary Subject Heading</b>: | Mental health                                                                                                                                                                                                                                                                                                                                                                                                                                                             |
| Secondary Subject Heading:      | Global health, Mental health                                                                                                                                                                                                                                                                                                                                                                                                                                              |
| Keywords:                       | MENTAL HEALTH, resilience, exploratory factor analysis, confirmatory factor analysis, convergent validity                                                                                                                                                                                                                                                                                                                                                                 |
|                                 |                                                                                                                                                                                                                                                                                                                                                                                                                                                                           |

SCHOLARONE™  
Manuscripts

1  
2  
3  
4  
5  
6  
7 Title: Connor-Davidson Resilience Scale: Validation study in a Portuguese sample  
8  
9  
10

11 Authors:

12 Joana FARIA-ANJOS

13 Faculdade de Psicologia – Universidade de Lisboa

14 Alameda da Universidade; 1649-013 Lisboa – Portugal.

15  
16  
17 Instituto Nacional de Emergência Médica – Portugal  
18  
19

20  
21 Maria João HEITOR DOS SANTOS

22 Instituto de Medicina Preventiva e Saúde Pública & Instituto de Saúde Ambiental,

23 Faculdade de Medicina, Universidade de Lisboa, Portugal  
24

25 Departamento de Psiquiatria e Saúde Mental, Hospital Beatriz Ângelo, Loures, Portugal  
26 Loures, Lisboa, 2674-514, Portugal  
27  
28

29  
30 Maria Teresa RIBEIRO

31 Faculdade de Psicologia – Universidade de Lisboa

32 Alameda da Universidade; 1649-013 Lisboa – Portugal.  
33  
34

35  
36 Sérgio MOREIRA

37 Faculdade de Psicologia – Universidade de Lisboa

38 Alameda da Universidade; 1649-013 Lisboa – Portugal.  
39  
40

41 Corresponding author:

42 Joana Faria-Anjos

43 Alameda da Universidade; 1649-013 Lisboa – Portugal. E-mail:

44 joana.f.anjos@gmail.com; Phone number: +351936010735.  
45  
46  
47  
48

49 **Key-words:** mental health; resilience; confirmatory factorial analysis; exploratory

50  
51 factorial analysis; convergent validity.  
52  
53  
54  
55

56 **Word count:** 6883 words  
57  
58  
59  
60

## Abstract

**Objective:** The objective of this paper is to evaluate the psychometric properties and convergent validity of first Portuguese version of the Connor- Davidson Resilience Scale (CD-RISC, 2003). **Participants:** Data sets came from two studies in Portugal, respectively, 476 participants from the Resilience Effect in Coping with Trauma (RECT) project and 405 participants from the Health Impact Assessment of Employment Strategies (HIAES) project. **Method and Results:** The original CD-RISC items were translated to Portuguese and used in a survey along with additional psychosocial and biomedical measures. An Exploratory Factorial Analysis (EFA) with each of the two samples revealed that the best solution in both samples had 3 factors - Self-Efficacy, Spirituality and Social Support. A Confirmatory Factor Analysis (CFA) using the two samples together and the 3 factors model specified on the EFA revealed, in absolute, a good overall fit and, comparatively, a better fit than the model with the original 5 factors. **Conclusions:** The bivariate correlations between the 3 factors and the variables used for the convergent validity are consistent with previous research and show significant correlations with physical activity, medication, mental health, subjective happiness and stress. There may be a protective and beneficial role of positive mental health and resilience on health outcomes.

## Article Summary

- Uses a Large sample of Portuguese participants studied with rigorous data collection protocols provide the right context to test the CD-RISC psychometric properties in the context of the Portuguese population.
- Applies sound validated data analysis methodologies (following Green and colleagues) for testing the psychometric properties.
- Makes available a tested (and validated by the original CD-RISC authors) translated version to the Portuguese speaking community.
- Has two different samples, requiring the adaptation of commonly used psychometric analysis.
- The two different samples also resulted in differences in test power for the convergent validity analysis.

## Funding statement

The Health Impact Assessment of Employment Strategies project (HIAES) was funded by The Office of the High Commissioner for Health followed by the General Health Direction.

## Competing interests

There are no competing interests.

## Introduction

Resilience can be described as a dynamic process of adaptively overcoming stress and adversity while maintaining normal psychological and physical functioning, and not merely the absence of psychopathology. [1] As an individual characteristic, resilience is likely influenced by external variables, such as adequate social support, that reduce risk for stress-related mental disorders by buffering the impact of stress.[2]

In a quantitative methodological review for searching, screening and appraising resilience scales quality, the Connor-Davidson Resilience Scale (CD-RISC), the Resilience Scale for Adults and the Brief Resilience Scale received the best psychometric ratings.[3]

Based on the perspective that resilience is a personal quality that reflects the ability to cope with stress, Connor and Davidson[4] developed a brief self-report scale to quantify resilience. The original version of CD-RISC has 25 self-rated items, each of them rated a 5-point scale from 0 ('not true at all') to 4 ('true nearly all the time'). Despite the absence of a proposed cut-off value, higher scores represent higher resilience. The CD-RISC was developed with participants from different settings, including the general population, primary care outpatients, psychiatric inpatients, and clinical trial patients.[4]The CD-RISC is a generic measure which can be applied to different populations since it was not developed for a specific group.[5]The original study demonstrated solid psychometric properties, with good internal consistency and test-retest reliability, with validity being demonstrated with other measures of stress and hardiness.[4] It suggested that resilience is modifiable and can improve with treatment. Further research on violent trauma showed that survivors who exhibit better health or less distress from the trauma are more resilient.[6]



1  
2  
3 The CD-RISC has been translated into over fifty languages and has been tested in  
4 several different contexts and specific populations: on general population[7-9]; post-  
5 9/11 U.S. military veteran[10]; United States Air Force[11]; adolescents[12]; university  
6 students[13,14]; young adults[15]; older adults[16]; earthquake survivors[5];  
7 adolescents' earthquake survivors[17]; homeless youth[18]; caregivers with chronic  
8 stress[19]; people with spinal cord injuries[20]; rehabilitation patients after  
9 unintentional injury[21]; sport performers[22], among many others.

10 Preliminary studies of the scale revealed that the CD-RISC has a multifactorial  
11 structure. Connor and Davidson[4] performed exploratory factor analysis, using the  
12 adults sample from general population. The factor analyses yielded 5 factors, named as  
13 *personal competence, high standards, and tenacity; trust in one's instinct, tolerance of*  
14 *negative affect and strengthening effects of stress; positive acceptance of change and*  
15 *secure relationships with others; control; spiritual influences.* Nevertheless, the CD-  
16 RISC factor structure still needs to be clarified since subsequent studies found different  
17 factor structures.

18 Prince-Embury[23] suggests that the instability of factor structure might have been  
19 related to insufficient numbers of items covering various aspects of the original  
20 construct and that factor structure differences would be expected in studies of groups  
21 that varied culturally and demographically.

22 Therefore, the objective of this study was to evaluate the psychometric properties of the  
23 CD-RISC Portuguese version with the aim of determining whether it can be used as a  
24 reliable and valid tool to assess Portuguese population resilience.

## Method

The study of CD-RISC psychometric properties and convergent validity was conducted with data sets coming from two studies.

The first data set comes from a research project on Resilience Effect in Coping with Trauma (RECT) in Portugal, conducted at the Faculty of Psychology of the University of Lisbon. This research project was reviewed by the Ethical Committee of the University of Lisbon – Faculty of Psychology and granted authorization to perform these studies. The second data set comes from a project on Health Impact Assessment of Employment Strategies (HIAES) in Portugal, which was approved by two institutional ethical committees, the Ethics Committee for Health of the National Institute of Health Doutor Ricardo Jorge, Public Institute and the Ethics Committee for Health of the Lisbon / North Hospital Center of Faculty of Medicine of the University of Lisbon. It was also approved by the National Commission of Data Protection. This research was conducted under the Helsinki declaration code of ethics.

### Patients and public involvement

All the participants, from both research projects, were informed of the investigation and gave their signed informed consent.

### Sample

The RECT project has a convenience sample of 476 participants (44% female participants) comprised by master students, technical course of medical emergency students, and general population. Participants from the HIAES project consist of 405 workers (51% female participants) at a private mutualistic financial institution -

1  
2  
3 Associação Mutualista Caixa Económica Montepio Geral (CEMG) – and is also a  
4  
5 convenience non-probabilistic sample. Descriptive data from the two samples for  
6  
7 general sociodemographic variables show noteworthy differences in age and education.  
8  
9  
10 Regarding the age of the participants, the mean for the RECT sample was 26  
11  
12 (SD=6.24), while the HIAES project's mean was 41 (SD=8.3). Concerning the  
13  
14 education variable, the RECT project's sample was composed mostly of participants  
15  
16 with a high school degree (58%), followed by middle school (27%) and graduate or  
17  
18 higher (15%) degrees. The HIAES project's sample, however, had a higher percentage  
19  
20 of participants with a graduate or higher degree (69%), followed by high school (30%)  
21  
22 and middle school (1%) degrees.  
23  
24  
25  
26  
27  
28  
29  
30

### 31 **Instruments**

32  
33 Besides the CD-RISC Scale, we also collected data for a set of other measures relevant  
34  
35 to each project objective. In this section we only describe the CD-RISC and the  
36  
37 measures relevant to test for convergent validity. It is important to note that different  
38  
39 data were collected in each of the samples and, also, for different groups within each  
40  
41 sample.  
42  
43  
44  
45

#### 46 **Connor-Davidson Resilience Scale (CD-RISC)**

47  
48 The CD-RISC[4] is a scale developed to quantify psychological resilience and the  
49  
50 clinical effects of the treatment of anxiety and depression. It is composed by 25 items  
51  
52 measured in a 5 points scale (0 - not true to 4 - almost always true) and the original  
53  
54 study describes five factors: the notion of personal competence, high standards, and  
55  
56 tenacity; trust in one's instincts, tolerance of negative affect, and strengthening effects  
57  
58  
59  
60

1  
2  
3 of stress; positive acceptance of change, and secure relationships; control; and finally,  
4 spiritual influences. Despite the Connor & Davidson's original study corroborating  
5 these five factors, latter studies have reported support for only one factor.[5]  
6  
7  
8  
9

### 10 **Additional measures**

11  
12 A set of additional 8 measures were collected in these two studies. More specifically, in  
13 the RECT project the following measures were collected.  
14  
15  
16  
17

- 18  
19  
20  
21  
22 • Social Provisions Scale (SPS), an instrument that measures perceived social  
23 support.[24] Here we used the Portuguese version developed by Moreira and  
24 Canaipa.[25]  
25  
26  
27
- 28  
29  
30  
31  
32 • Satisfaction With Life Scale (SWLS), an instrument that measures life  
33 satisfaction based on the subjective judgement done by each person,  
34 accordingly to his own pattern of life satisfaction.[26] We used the  
35 Portuguese adaptation of the scale conducted by Simões.[27]  
36  
37  
38
- 39  
40  
41  
42 • Perceived Stress Scale (PSS-10), a reduced version of PSS,[28, 29] an  
43 instrument used to measure the perception of stress. We used the Portuguese  
44 adaptation of the PSS-10 described by Rocha.[30]  
45  
46  
47
- 48  
49  
50  
51 • Stress Vulnerability Questionnaire (23QVS), a measure of the individual's  
52 vulnerability to stress.[31]  
53

54 In the HIAES project 4 additional measures were collected:

- 55 • Health and life styles (H&LS) information regarding perceived health  
56 (measured using a single item - "How would you classify your general health  
57 state during the last three months?" - and a three points Likert), the practice  
58  
59  
60

1  
2  
3 of physical exercise (measured using both a practice frequency and a practice  
4 quality scales) and medication consumption (measured using a dichotomous  
5 scale – yes versus no - for a set of fourteen clinical conditions).  
6  
7  
8

- 9  
10  
11 • Biomedical indexes (BI) measured by means of blood samples,  
12 anthropometric parameters and blood pressure.  
13  
14  
15  
16 • Mental Health Inventory (MHI-5), the reduced version of the MHI Ribeiro  
17 2001[32]that measures psychological stress and well-being using 5 items and  
18 a frequency scale of 1, always, to 6, never. Here, we used a Portuguese  
19 adaptation of the MIH-5 described by Ribeiro.[33]  
20  
21  
22  
23  
24  
25  
26 • Subjective Happiness Scale (SHS), a measure of subjective happiness  
27 originally developed by Lyubomirsky and Lepper,[34] composed by four  
28 items responded on a Likert 7 points scale. Again, we used a Portuguese  
29 version described by Pais-Ribeiro.[35]  
30  
31  
32  
33  
34  
35  
36  
37  
38

## 39 Procedure

### 40 41 42 Translation and adaptation to the Portuguese Language

43  
44 The CD-RISC items were translated through a process of translation and back-  
45 translation from the original American scale[4] by specialists in psychology and fluent  
46 in both Portuguese and English, and finally approved by the original CD-RISC authors.  
47  
48  
49  
50  
51  
52  
53  
54  
55  
56  
57  
58  
59  
60

### Survey procedure

For the RECT data a survey was conducted between April 2009 and May 2010. The protocol application was in paper and pencil format and either face to face or administered in a classroom context. Part of the sample (421 participants) only answered to the CD-RISC scale. Another part of the sample (the remaining 55 participants) was available on a second moment of the study and responded to all of the additional convergent validity measures.

For the HIAES data a survey was conducted between November 2012 and June 2013. The survey had two parts: on a first part the participants answered the survey electronically, on a second part, the participants answered to the CD-RISC in paper and pencil format. Additionally, for a subsample of 260, anthropometric measures and blood samples were also collected.

### Psychometric properties

The main objective of this paper was to study the psychometric characteristics of the Portuguese version of the CD-RISC. We followed Green and colleagues' [10] procedure where an Exploratory Factorial Analysis (EFA) was used to test the factorial structure of the original 25-item 5-factor solution version of the CD-RISC and afterwards a Confirmatory Factor Analysis (CFA) was used to compare a proposed solution based on the EFA results with Connor and Davidson's original one. We note that this methodology used by Green and colleagues is particularly suited for our type of data. More specifically, this methodology allows to understand the specific behavior of the items in each of the two samples and only then to test of the factorial structure of the scale with the complete sample.

1  
2  
3 Two independent EFAs were conducted in each one of the two data sets. In this  
4  
5 analysis, the following criteria were taken into account. First, to determine the number  
6  
7 of factors we considered the criteria an eigenvalue higher than 0.7. Second, for the  
8  
9 interpretation of the items in each factor there were considered the oblimin rotated  
10  
11 solutions once it is expected that the factors correlate among themselves. Additionally,  
12  
13 for an item to be held for a particular factor communalities should be higher than 0.09,  
14  
15 and loadings equal or higher to 0.32 and also cross-loadings lower to 0.32.[36] Finally,  
16  
17 the resulting items in a factor were tested for internal consistency using Cronbach alpha.  
18  
19 Following the EFA, two CFAs were conducted using the complete sample to test and  
20  
21 compare both the proposed solution as specified by EFA and the original 25-item 5-  
22  
23 factor solution. The statistical quality of the models was assessed using two sets of  
24  
25 measures. First, measures of the overall goodness of fit measures considering the  
26  
27 following criteria: SRMR and RMSEA lower or equal to 0.08, Comparative Fit Index  
28  
29 (CFI) and Tucker-Lewis Index (TLI) higher or equal to 0.90. Additionally, measures of  
30  
31 the localized areas of strain with the following criteria: standardized residuals lower or  
32  
33 equal to 2.58 and general modification indexes analysis lower or equal to 4.  
34  
35  
36  
37  
38  
39  
40  
41  
42  
43  
44

### 45 **Convergent validity**

46  
47 Another aim of the present paper is to provide data for the convergent validity of the  
48  
49 CD-RISC. The convergent validity is a form of validation that tests for the association  
50  
51 between a construct measured by a scale and other measures that theoretically relate to  
52  
53 this construct.[37, 38] For the convergent validity of the CD-RISC, variables used in the  
54  
55 survey of the HIAES and RECT project were selected and bivariate correlations were  
56  
57 computed. First, due to the sample dimension and the characteristics of the variables  
58  
59  
60

1  
2  
3 studied, only correlations with a p-value equal or lower than 0.01 are considered  
4 statistically significant.[39] Second, for the interpretation we considered correlation  
5 values inferior to 0.20 as weak correlations, between 0.20 and 0.60 as moderate  
6 correlations, and higher than 0.60 strong correlations.  
7  
8  
9  
10  
11  
12  
13  
14  
15

## 16 **Results**

### 17 **Psychometric validation**

#### 18 **Exploratory Factorial Analysis**

19  
20  
21  
22  
23  
24  
25 A first set of EFAs were conducted on each data sample forcing the 25-items to the  
26 original 5-factor solution and, following Karairmak[5] and Burns and Anstey,[15] to 3-  
27 factor and 1-factor solutions. The results on both data set indicated that none of the  
28 solutions replicated corresponding results. In fact, the factor structure for the 5 and 3-  
29 factor solutions did not hold, and for the three solutions tested several items revealed  
30 low communalities, low loadings and cross loadings in both samples. In line with this,  
31 items 5, 11, 12, 14, 17, 20 and 23 were excluded because of systematic problems in the  
32 different solutions. A second set of EFAs were conducted with the 18-items for each  
33 data sample. Once the original 5-factor and 3-factor solutions could no longer be  
34 interpreted, we used the scree-plot to choose the best solution. The results on both data  
35 sets showed that the best solution had 3 factors but items 22 and 25 still revealed  
36 problematic. A final set of EFAs was conducted with the 16-items. Results showed that  
37 the best solution in both samples had 3 factors with, respectively, 37% and 31% of  
38 explained variance (  
39  
40  
41  
42  
43  
44  
45  
46  
47  
48  
49  
50  
51  
52  
53  
54  
55  
56  
57  
58  
59  
60

Table 1



Table 2

and Table ). Factor 1 was the most representative factor, composed of 11 items and explained, respectively, 20% and 16% of variance, and an alpha of 0.82 and 0.76. This factor, that we labeled **Self-Efficacy**, describes individuals' beliefs about not only their personal competence while dealing with challenging demands, but also their ability to exercise control over their own functioning. Factor 2 was composed of 3 items and explained, respectively, 9% and 8% of variance, and an alpha of 0.71 and 0.67. This factor was named **Spirituality** and evaluates specific aspects of spirituality, namely the belief that life has a purpose and that spiritual forces can influence earthly events. Finally, Factor 3 was composed of 2 items and explained, respectively, 8% and 7% of variance, and an alpha of 0.53 and 0.44. This factor refers to the perceived **Social Support**, and evaluates how people perceive their reliance on others for emotional and functional support. We note that the alphas for Self-Efficacy and Spirituality are above 0.7. Also, for the Social Support, once there were only two items, we used bivariate correlations. Here the results show a moderate association between the two items.

A descriptive analysis of the three subscales show that the average results for Self-Efficacy are above the mid-point of the scale and have small standard deviations (SD) on both RECT and HIAES samples, respectively, 2.92 (SD=0.54) and 3.03 (SD=0.40). The same applies to the average results and standard deviations of the Spirituality subscale, respectively 2.64 (SD=0.91) and 2.47 (SD=0.84), and of the Social Support subscale, respectively 3.14 (SD=0.83) and 3.24 (SD=0.67).

Table 1

Table 2

### Confirmatory Factorial Analysis

CFA was conducted to test the model specified by EFA and to compare this model with the one suggested by Connor and Davidson's original five-factor solution. Considering the meaning of both the proposed three factors solution and the original five-factors solution, in both cases the CFAs were computed allowing for factors to correlate among themselves.

A preliminary analysis of the frequency distributions and statistics for skewness and kurtosis of CD-RISC show severe negative asymmetry of the data in most of the 25 items. To reduce the impact of the data distributions on the model computations, we log transformed all the data (note that the data was previously transformed to eliminate zero values by adding a constant, and afterwards all the results were inverted). The asymmetry of the resulting log transformed frequency distributions for the 25 items were significantly reduced and consequently used in the CFA.

The results for the proposed 16-item 3-factors solution reveal a good overall fit,  $\chi^2(101) = 368.64, p < .001$ ; SRMR = .05, RMSEA = .06 [.05, .06], CFI = .90, TLI = .89.

The analysis also shows that few standardized residuals are higher than 2.58 and, similarly, few modification indexes are above 4. Finally, all items were highly correlated with their factors, with all correlations between .40 and .77 and all  $ps < .001$ .

The results for the original 25-item 5-factor solution reveal a moderate overall fit, with both CFI and TLI measures slightly below the criteria,  $\chi^2(263) = 1219.08, p < .001$ ; SRMR = .06, RMSEA = .07 [.06, .07], CFI = .82, TLI = .79. Additionally, the analysis also shows several standardized residuals above the criteria and, similarly, several

1  
2  
3 modification indexes are above 4. All items were significantly correlated with their  
4 factors (all  $ps < .001$ ), but correlations ranged between a weak .20 and strong .70.  
5  
6

7 Overall, the proposed 16-item 3-factors solution had better performance in the CFA.  
8  
9

### 10 11 12 13 14 **Convergent validity**

15  
16 Six of the 8 measures used to test the convergent validity (i.e., SPS, SWLS, PSS-10,  
17 23QVS, MHI5 and SHS) were tested for the psychometric properties on their  
18 unidimensional versions (Table 3). Results all levels of explained variance are above  
19 40% all Cronbach alphas' above 80. The sole exception to these results is the 23QVS  
20 with a somewhat lower explained variance of 23% and alpha of 0.76. Additionally, for  
21 the H&LS we consider a single item on physical health (Phea) and two indexes, one on  
22 physical activity (Pact) using the average of the frequency of psychical activity and of  
23 commitment to the physical activity, and an index on medication consumption (Mcons),  
24 consisting in the sum of the answers for medication consumption regarding 14 clinical  
25 conditions. Finally, for the BI we computed an index to identify the presence of  
26 metabolic syndrome (Met) using the recommendations of the European Society of  
27 Cardiology (ESC, <http://www.escardio.org>) and an index for cardiovascular risk (Card)  
28 based on the norms of the Portuguese Society of Cardiology (SPC, [www.spc.pt](http://www.spc.pt)).  
29  
30  
31  
32  
33  
34  
35  
36  
37  
38  
39  
40  
41  
42  
43  
44  
45

46 Table 3

47  
48  
49 Table 4

50  
51  
52  
53 Bivariate correlations were computed between each one of the three subscales,  
54 computed based on the 16-items in the CD-RISC, and each of the 8 measures described  
55  
56  
57  
58  
59  
60

1  
2  
3 above and used to test the convergent validity (Table. 4. Bivariate correlation coefficients  
4  
5 between the CD-RISC scale and the measures used to test the convergent validity.  
6

7 ). The data that support the findings of this study are openly available in figshare at  
8  
9 <https://doi.org/10.6084/m9.figshare.7111676.v1>.  
10  
11  
12

## 13 14 15 **Discussion**

16  
17 The objective of this paper is to evaluate the psychometric properties and convergent  
18  
19 validity of the first Portuguese version of the CD-RISC. Despite the importance of this  
20  
21 construct, to date, there is no validated scale to measure resilience in the Community of  
22  
23 Portuguese Language Countries (CPLP, n.d.), estimated to be more than two hundred  
24  
25 and seventy million people. Resilience is a fundamental element of mental health, health  
26  
27 assets, capabilities and positive adaptation. It enables people both to cope with adversity  
28  
29 and to reach their full potential, and influences a wide range of outcomes at individual  
30  
31 and community level, including healthier lifestyles, better physical health, improved  
32  
33 recovery from illness, fewer limitations in daily living, higher educational attainment,  
34  
35 greater productivity, employment and earnings, better relationships with adults and with  
36  
37 children, more social cohesion and engagement and improved quality of life.[40]It is  
38  
39 not a surprise that resilience has been extensively measured and used to understand  
40  
41 individual and social phenomena.  
42  
43  
44  
45  
46

47  
48 The results do not replicate the original five factors structure, instead, the results suggest  
49  
50 a three factors structure with self-efficacy, spirituality, and social support dimensions  
51  
52 represented. Although this result is not consistent with the original proposal from  
53  
54 Connor and Davidson, it is consistent with more recent studies.[5, 41] Consistent with  
55  
56 this, the variability of factor structures found in CD-RISC has been document and owed  
57  
58 to methodological variations, idiosyncratic samples and, importantly, to cross-cultural  
59  
60

1  
2  
3 factors.[42] We also note that similarly to the original study and to some of the  
4  
5 following research, self-efficacy is the factor that explains the greatest variance of the  
6  
7 original items. Still, although the results are important to understand the construct of  
8  
9 resilience and how CD-RISC works as an instrument measuring this construct in a  
10  
11 Portuguese sample, we note that the resulting scale should not be regarded as an  
12  
13 improved version. In fact, we consider that improved usage of this scale would come  
14  
15 from prior testing of the factorial structure of the original 25 items and comparison with  
16  
17 the results of this paper and alike.  
18  
19  
20  
21

22 The results from the validation are, with one sole and justifiable exception, consistent  
23  
24 with evidence from the literature. The results for the self-efficacy factor show a  
25  
26 significant negative association with the two measures of stress considered - perceived  
27  
28 stress ( $r=-0.32$ ) and vulnerability to stress ( $r=-0.34$ ). This result is consistent with the  
29  
30 idea that people with high efficacy beliefs are able to overcome obstacles and focus on  
31  
32 opportunities, and are more able to perceive stressful situations as challenging rather  
33  
34 than as problematic events.[43] Also, the results show positive correlations between the  
35  
36 self-efficacy factor and two additional variables, namely, subjective happiness ( $r=0.31$ )  
37  
38 and mental health ( $r=0.35$ ). Again, this is consistent with the literature where self-  
39  
40 efficacy beliefs are considered to regulate positive and negative emotions. In this sense,  
41  
42 people with higher self-efficacy beliefs are less distressed and feel more capable of  
43  
44 dealing with the problematic situations.[44] Recent studies have found that self-efficacy  
45  
46 is indeed positively correlated with happiness[45] and satisfaction with life.[43] Finally,  
47  
48 another set of striking correlations show, although moderately, the self-efficacy factor  
49  
50 as a significant and negative correlation with physical health ( $r=-0.17$ ) and medication  
51  
52  
53  
54  
55  
56  
57  
58  
59  
60

1  
2  
3 consumption ( $r=-0.13$ )<sup>1</sup>. These last results constitute an extension of the findings where  
4 self-efficacy is associated with increased health and life satisfaction.  
5  
6

7  
8 The results for the spirituality factor show only a marginal significant correlation with  
9 the vulnerability to stress measure ( $r=0.25$ ). This result is consistent with Connor and  
10 colleagues[6] study with survivors of violent trauma, where spirituality is proposed as a  
11 coping strategy do deal with higher Posttraumatic Stress Disorder scores. Still, the fact  
12 that spirituality does not relate with any other variables is not consistent with the  
13 literature, where previous studies have successfully established correlations between  
14 spirituality and happiness[46] and spirituality and life satisfaction.[47] The absence of  
15 effects can be a result of the low statistical power due to the small sample size in the  
16 RECT sample. In fact, a post hoc power analysis shows that the power to detect a  
17 significant correlation of 0.20 at 0.05 in our sample is only 0.28.  
18  
19

20  
21 Finally, the results for the social support scale show a moderate significant correlation  
22 ( $r=0.48$ ) with the Social Provision Scale.[24] Interestingly, this is the only significant  
23 correlation of the Social Provision Scale, which supports the assumptions that this factor  
24 is a specific dimension of resilience. Additionally, the social support scale is also  
25 correlated with the SHS ( $r=0.30$ ) and MHI5 ( $r=0.26$ ) scales. This result is consistent  
26 with the literature showing the strong impact of social support on happiness especially  
27 from closer social circles.[48] For instance, in a study with survivors from a natural  
28 disaster, the authors found that pre-disaster happiness and post-disaster social support  
29 were protective against the negative effect of the hurricane on survivors' post-disaster  
30 happiness.[49] Our results also show a marginal significant negative correlation  
31 between social support and vulnerability to stress ( $r=-0.24$ ). It is becoming increasingly  
32  
33  
34  
35  
36  
37  
38  
39  
40  
41  
42  
43  
44  
45  
46  
47  
48  
49  
50  
51  
52  
53  
54  
55  
56  
57  
58

---

59 <sup>1</sup> “Note that physical health is measured using a single item where the higher the value the lower the  
60 physical health reported”.

1  
2  
3 consensual that the lack of social support is an important risk factor in dealing with  
4 stressful and adverse life events.[50] Finally, our results also show that social support  
5 correlates significantly with metabolic syndrome ( $r=-0.13$ ) and cardiovascular risk ( $r=-$   
6  $0.10$ ), although the magnitude of both correlations is weak. Although some of the  
7 literature describes a conflicting relation between social support and physical  
8 health,[51] it appears that social support is negatively associated with cardiovascular  
9 death and that it protects against recurrent events, the existing research involving the  
10 predictive relation between social support/social networks and incidence of disease,  
11 specifically cardiovascular disease.  
12  
13

14  
15 In summary, regarding the self-efficacy factor, we found associations with perceived  
16 stress, vulnerability to stress, subjective happiness and mental health. Additionally, we  
17 also found associations with perceived physical health and medication consumption,  
18 what we consider to be an extension of the findings relating self-efficacy with health  
19 and life satisfaction. Regarding the spirituality factor, we found only an association with  
20 vulnerability to stress. This result is not consistent with the literature where spirituality  
21 has been related with stress, happiness and life satisfaction. As mentioned, the absence  
22 of effects here are likely due to low test power. Finally, regarding the social support  
23 scale, we found association with the Social Provision Scale, subjective happiness,  
24 mental health and vulnerability to stress. Additionally, we also found an association  
25 with the two biomedical indexes used, specifically, cardiovascular risk and metabolic  
26 syndrome. Resilience, through its self-efficacy component, showed a protective effect  
27 on the extent of the myocardial infarction, by affecting the inflammatory  
28 response.[52] Emotional vitality, as part of healthy psychological functioning, may  
29 protect against risk of coronary heart disease (CHD).[53] Resilience could have life-  
30  
31  
32  
33  
34  
35  
36  
37  
38  
39  
40  
41  
42  
43  
44  
45  
46  
47  
48  
49  
50  
51  
52  
53  
54  
55  
56  
57  
58  
59  
60

1  
2  
3 saving effects. Prevention and intervention in CHD must involve not only measures to  
4  
5 reduce psychological distress but should also focus on promoting positive emotions.  
6  
7  
8  
9

### 10 11 **Applications for the Portuguese version of the CD-RISC** 12

13  
14 Our study extends the literature that has provided support on the importance of the  
15  
16 construct of resilience, and, more particularly, on the use of CD-RISC as a reliable  
17  
18 measure of this construct. In fact, using a robust psychometric method we replicated  
19  
20 more recent studies describing three main dimensions of resilience. Additionally, using  
21  
22 a vast array of validated measures we also showed how these factors are associated with  
23  
24 scales, indexes and even behavioral measures in a way that is consistent with the  
25  
26 literature. Importantly, these associations support the distinctiveness of the three factors,  
27  
28 with different factors relating, as expected, with some different convergent measures.  
29  
30 Take for instance the strong correlation between the social support factor and the Social  
31  
32 Provision Scale, and the stronger correlations between the self-efficacy factor and both  
33  
34 stress and vulnerability to stress. A curious finding here is the specific association of  
35  
36 self-efficacy with physical health and medication consumption and the association of  
37  
38 social support with two biomedical indexes, cardiovascular risk and metabolic  
39  
40 syndrome.  
41  
42  
43  
44  
45  
46

### 47 **Future directions and research limitations** 48

49  
50 Most importantly, our study extends the possibility to measure and investigate resilience  
51  
52 in Portuguese communities using a rigorously validated scale. In this sense, on the  
53  
54 psychometric side, future studies with this community can explore further the three  
55  
56 factors structure of the CD-RISC and test for the convergent validity with new samples.  
57  
58 On this regard, we reinforce that a limitation of the current paper is the difference in test  
59  
60



1  
2  
3 power between the two samples used to do the convergent validity. This is particularly  
4 important because the low test power sample (from RECT project) included important  
5 and unique validation measures and because the spirituality scale did not replicate  
6 entirely the findings in the literature. Finally, and considering both research and  
7 practice, future studies with the Portuguese communities can follow the factorial  
8 structure found and validated. These studies can, again, provide additional support to  
9 the theoretical and practical relevance of resilience and its dimensions as measured by  
10 the CD-RISC.  
11  
12  
13  
14  
15  
16  
17  
18  
19  
20  
21  
22  
23  
24

25 Abbreviations:

26  
27 23QVS: Stress Vulnerability Questionnaire

28  
29  
30 BI: Biomedical indexes

31  
32  
33 Card: cardiovascular risk

34  
35  
36 CD-RISC: Connor- Davidson Resilience Scale

37  
38  
39 CFA: Confirmatory Factor Analysis

40  
41  
42 CHD: Coronary heart disease

43  
44  
45 EFA: Exploratory Factorial Analysis

46  
47  
48 H&LS: Health and life styles

49  
50  
51 HIAES: Health Impact Assessment of Employment Strategies

52  
53  
54 Mcons: Medication consumption

55  
56  
57 Met: metabolic syndrome

58  
59  
60 MHI-5: Mental Health Inventory

1  
2  
3 RECT: Resilience Effect in Coping with Trauma  
4

5  
6 Pact: Physical activity  
7

8  
9 Phea: Physical health  
10

11  
12 PSS-10: Reduced version of Perceived Stress Scale  
13

14  
15 SHS: Subjective Happiness Scale (SHS),  
16

17  
18 SPS: Social Provisions Scale  
19  
20  
21  
22  
23  
24  
25  
26  
27  
28  
29  
30  
31  
32  
33  
34  
35  
36  
37  
38  
39  
40  
41  
42  
43  
44  
45  
46  
47  
48  
49  
50  
51  
52  
53  
54  
55  
56  
57  
58  
59  
60

## References

1. Rutten, B. P., Hammels, C., Geschwind, N., Menne-Lothmann, C., Pishva, E., Schruers, K., . . . Wichers, M. (2013). Resilience in mental health: linking psychological and neurobiological perspectives. *Acta Psychiatr Scand*, *128*(1), 3-20. doi:10.1111/acps.12095
2. McCrory, E., De Brito, S. A., & Viding, E. (2010). Research review: the neurobiology and genetics of maltreatment and adversity. *J Child Psychol Psychiatry*, *51*(10), 1079-1095. doi:10.1111/j.1469-7610.2010.02271.x
3. Windle, G., Bennett, K. M., & Noyes, J. (2011). A methodological review of resilience measurement scales. *Health Qual Life Outcomes*, *9*, 8. doi:10.1186/1477-7525-9-8
4. Connor, K. M., & Davidson, J. R. (2003). Development of a new resilience scale: the Connor-Davidson Resilience Scale (CD-RISC). *Depress Anxiety*, *18*(2), 76-82. doi:10.1002/da.10113
5. Kararımak, Ö. (2010). Establishing the psychometric qualities of the Connor-Davidson Resilience Scale (CD-RISC) using exploratory and confirmatory factor analysis in a trauma survivor sample. *Psychiatry Research*, *179*(3), 350-356. doi:10.1016/j.psychres.2009.09.012
6. Connor, K. M., Davidson, J. R., & Lee, L.-C. (2003). Spirituality, Resilience, and Anger in Survivors of Violent Trauma: A Community Survey. *Journal of Traumatic Stress*, *16*(5), 487.

- 1  
2  
3 7. González, V. B. A., Sierra, M. T. C., Martínez, B. A., Martínez-Molina, A., &  
4  
5 Ponce, F. P. (2015). An in-depth psychometric analysis of the Connor-Davidson  
6  
7 Resilience Scale: calibration with Rasch-Andrich model. *Health & Quality of Life*  
8  
9 *Outcomes*, 13(1), 1-12. doi:10.1186/s12955-015-0345-y
- 10  
11  
12 8. Jung, Y.-E., Min, J.-A., Shin, A. Y., Han, S. Y., Lee, K.-U., Kim, T.-S., . . . Chae,  
13  
14 J.-H. (2012). The Korean Version of the Connor-Davidson Resilience Scale: An  
15  
16 Extended Validation. *Stress & Health: Journal of the International Society for the*  
17  
18 *Investigation of Stress*, 28(4), 319-326. doi:10.1002/smi.1436
- 19  
20  
21 9. Liu, D., Fairweather-Schmidt, A., Burns, R., & Roberts, R. (2015). The Connor-  
22  
23 Davidson Resilience Scale: Establishing Invariance Between Gender Across the  
24  
25 Lifespan in a Large Community Based Study. *Journal of Psychopathology &*  
26  
27 *Behavioral Assessment*, 37(2), 340.
- 28  
29  
30 10. Green, K. T., Hayward, L. C., Williams, A. M., Dennis, P. A., Bryan, B. C., Taber,  
31  
32 K. H., MIRECC Working Group, Davidson, J.R.T., Beckham, J.C., Calhoun, P.C.  
33  
34 (2014). Examining the Factor Structure of the Connor–Davidson Resilience Scale  
35  
36 (CD-RISC) in a Post-9/11 US Military Veteran Sample. *Assessment*, 21(4), 443–  
37  
38 451. doi:10.1177/1073191114524014
- 39  
40  
41 11. Bezdjian, S., Schneider, K. G., Burchett, D., Baker, M. T., & Garb, H. N. (2016).  
42  
43 Resilience in the United States Air Force: Psychometric Properties of the Connor-  
44  
45 Davidson Resilience Scale (CD-RISC). *Psychological Assessment*.  
46  
47 doi:10.1037/pas0000370
- 48  
49  
50 12. Jørgensen, I. E., & Seedat, S. (2008). Factor structure of the Connor-Davidson  
51  
52 Resilience Scale in South African adolescents. *International Journal of Adolescent*  
53  
54 *Medicine and Health*, 20(1), 23-32. doi:10.1515/IJAMH.2008.20.1.23
- 55  
56  
57 13. Di Fabio, A., & Palazzeschi, L. (2012). Connor-Davidson Resilience Scale:  
58  
59 Psychometric properties of the Italian version. = Connor-Davidson Resilience Scale:  
60

- 1  
2  
3           proprietà psicometriche della versione Italiana. *Counseling: Giornale Italiano di*  
4  
5           *Ricerca e Applicazioni*, 5(1), 101-109.  
6  
7
- 8   14. Khoshouei, M. S. k. m. y. c. (2009). Psychometric Evaluation of the Connor-  
9           Davidson Resilience Scale (CD-RISC) Using Iranian Students. *International*  
10           *Journal of Testing*, 9(1), 60-66. doi:10.1080/15305050902733471  
11  
12  
13
- 14   15. Burns, R. A., & Anstey, K. J. (2010). The Connor–Davidson Resilience Scale (CD-  
15           RISC): Testing the invariance of a uni-dimensional resilience measure that is  
16           independent of positive and negative affect. *Personality and Individual Differences*,  
17           48(5), 527-531. doi:10.1016/j.paid.2009.11.026  
18  
19  
20  
21  
22  
23
- 24   16. Serrano-Parra, M. D., Garrido-Abejar, M., Notario-Pacheco, B., Bartolomé-  
25           Gutierrez, R., Solera-Martínez, M., & Martínez-Vizcaino, V. (2012). Validez de la  
26           escala de Resiliencia de Connor-Davidson (CD-RISC) en una población de mayores  
27           entre 60 y 75 años. *Validity of the Connor Davidson Resilience scale (CD-RISC) in*  
28           *people from 60-to-75 years old.*, 5(2), 49-57.  
29  
30  
31  
32  
33  
34
- 35   17. Yu, X.-n., Lau, J. T. F., Mak, W. W. S., Zhang, J., Lui, W. W. S., & Zhang, J.  
36           (2011). Factor structure and psychometric properties of the Connor-Davidson  
37           Resilience Scale among Chinese adolescents. *Comprehensive Psychiatry*, 52(2),  
38           218-224. doi:10.1016/j.comppsy.2010.05.010  
39  
40  
41  
42
- 43   18. Asante, K. O., & Meyer-Weitz, A. (2014). Measuring resilience among homeless  
44           youth: Psychometric assessment of the Connor-Davidson Resilience Scale in Ghana.  
45           *Journal of Psychology in Africa*, 24(4), 321-326.  
46  
47  
48  
49
- 50   19. Crespo, M., Fernández-Lansac, V., & Soberón, C. (2014). Adaptación Española de  
51           la 'Escala de resiliencia de Connor-Davidson' (CD-RISC) en situaciones de estrés  
52           crónico. = Spanish version of the Connor-Davidson Resilience Scale (CD-RISC) for  
53           chronic stress situations. *Behavioral Psychology / Psicología Conductual: Revista*  
54           *Internacional Clínica y de la Salud*, 22(2), 219-238.  
55  
56  
57  
58  
59  
60

- 1  
2  
3  
4  
5  
6  
7  
8  
9  
10  
11  
12  
13  
14  
15  
16  
17  
18  
19  
20  
21  
22  
23  
24  
25  
26  
27  
28  
29  
30  
31  
32  
33  
34  
35  
36  
37  
38  
39  
40  
41  
42  
43  
44  
45  
46  
47  
48  
49  
50  
51  
52  
53  
54  
55  
56  
57  
58  
59  
60
20. Fujikawa, M., Lee, E.-J., Chan, F., Catalano, D., Hunter, C., Bengtson, K., & Rahimi, M. (2013). The Connor-Davidson Resilience Scale as a Positive Psychology Measure for People with Spinal Cord Injuries. *Rehabilitation Research, Policy, and Education*, 27(3), 213-222.
21. Peng, L., Zhang, J., Chen, H., Zhang, Y., Li, M., Yu, Y., & Liu, B. (2014). Comparison among different versions of Connor-Davidson Resilience Scale (CD-RISC) in rehabilitation patients after unintentional injury. *African Journal of Psychiatry*, 17(6), 1-5.
22. Gonzalez, S. P., Moore, E. W. G., Newton, M., & Galli, N. A. (2016). Validity and reliability of the Connor-Davidson Resilience Scale (CD-RISC) in competitive sport. *Psychology of Sport & Exercise*, 23, 31-39.  
doi:10.1016/j.psychsport.2015.10.005
23. Prince-Embury, S. (2013). The Connor-Davidson Resilience Scale. In S. Prince-Embury, D. H. Saklofske, S. Prince-Embury, & D. H. Saklofske (Eds.), *Resilience in children, adolescents, and adults: Translating research into practice*. (pp. 161-166). New York, NY, US: Springer Science + Business Media.
24. Cutrona, C. E., & Russell, D. W. (1987). The provisions of social relationships and adaptation to stress. *Advances in personal relationships*, 1(1), 37-67.
25. Moreira, J. M., & Canaipa, R. (2007). A escala de provisões sociais: Desenvolvimento e validação da versão portuguesa da 'Social Provisions Scale.' = Social Provision Scale, Portuguese version: Development and validation study. *Revista Iberoamericana de Diagnóstico y Evaluación Psicológica*, 24(2), 23-58.
26. Diener, E., Emmons, R. A., Larsen, R. J., & Griffin, S. (1985). The Satisfaction With Life Scale. *Journal of Personality Assessment*, 49(1), 71-75.  
doi:10.1207/s15327752jpa4901\_13

- 1  
2  
3 27. Simões, A. (1992). Ulterior validação de uma escala de satisfação com a vida  
4  
5 (SWLS). *Revista Portuguesa de Pedagogia*, 26(3), 503-515.  
6  
7  
8 28. Cohen, S., Kamarck, T., & Mermelstein, R. (1983). A Global Measure of Perceived  
9  
10 Stress, 385.  
11  
12 29. Cohen, S., & Williamson, G. (1988). Perceived stress in a probability sample of the  
13  
14 United States. *The social psychology of health: Claremont Symposium on applied*  
15  
16 *social psychology*. Edited by: Spacapan S, Oskamp S. 1988: Newbury Park, CA:  
17  
18 Sage.  
19  
20  
21 30. Rocha, P. (2009). Família e Trabalho: (Des)Equilíbrios que orientam a  
22  
23 (In)Satisfação. Valor do Apoio Social e da Vinculação. Tese de Mestrado em  
24  
25 Psicologia (Stress e Bem-Estar), FPCE, UL.  
26  
27  
28 31. Vaz-Serra, A. (2000). Construção de uma escala para avaliar a vulnerabilidade ao  
29  
30 Stress: a 23 QVS.  
31  
32  
33 32. Veit, C. T., & Ware, J. E. (1983). The structure of psychological distress and well-  
34  
35 being in general populations. *Journal of Consulting & Clinical Psychology*, 51, 730-  
36  
37 742. doi:10.1037/0022-006X.51.5.730  
38  
39  
40 33. Ribeiro, J. L. P. (2001). Mental Health Inventory: Um estudo de adaptação à  
41  
42 população portuguesa. *Psicologia, Saúde & Doenças*, 2(1), 77-99.  
43  
44  
45 34. Lyubomirsky, S., & Lepper, H. S. (1999). A Measure of Subjective Happiness:  
46  
47 Preliminary Reliability and Construct Validation, 137.  
48  
49  
50 35. Pais-Ribeiro, J. L. (2012). Validação transcultural da Escala de Felicidade  
51  
52 Subjectiva de Lyubomirsky e Lepper / Cross cultural validation of the Lyubomirsky  
53  
54 and Lepper subjective happiness scale. *Psicologia, Saúde & Doenças*(2), 157.  
55  
56  
57 36. Tabachnick, B. G., & Fidell, L. S. (2007). *Using multivariate statistics*: Boston :  
58  
59 Pearson and Allyn and Bacon. cop. 2007. 5th ed.  
60

- 1  
2  
3 37. Campbell, D. T., & Fiske, D. W. (1959). Convergent and discriminant validation by  
4 the multitrait-multimethod matrix. *Psychological Bulletin*, 56(2), 81-105.  
5  
6 doi:10.1037/h0046016  
7  
8  
9  
10 38. Cronbach, L. J., & Meehl, P. E. (1955). Construct validity in psychological tests.  
11  
12 *Psychological Bulletin*, 52(4), 281.A  
13  
14 39. Field, A. (2009). *Discovering statistics using SPSS : and sex and drugs and*  
15 *rock'n'roll*: London : Sage. 2009. 3rd edition.  
16  
17  
18 40. Friedli, L., & World Health Organization. (2009). Mental health, resilience and  
19 inequalities.  
20  
21  
22  
23 41. Xie, Y., Peng, L., Zuo, X., & Li, M. (2016). The Psychometric Evaluation of the  
24 Connor-Davidson Resilience Scale Using a Chinese Military Sample. *PLoS ONE*,  
25 11(2), 1-10. doi:10.1371/journal.pone.0148843  
26  
27  
28  
29 42. Davidson, J. R. & Connor, K. M. (2017) *Connor-Davidson Resilience Scale (CD-*  
30 *RISC) Manual*. Unpublished and partly accessible at [www.cd-risc.com](http://www.cd-risc.com).  
31  
32  
33  
34 43. Luszczynska, A., Gutiérrez-Doña, B., & Schwarzer, R. (2005). General self-efficacy  
35 in various domains of human functioning: Evidence from five countries.  
36  
37 *International Journal of Psychology*, 40(2), 80-89.  
38  
39 doi:10.1080/00207590444000041  
40  
41  
42  
43 44. Bandura, A. (1997). Self-efficacy. *Harvard Mental Health Letter*, 13(9), 4.  
44  
45  
46 45. Erozkan, A., Dogan, U., & Adiguzel, A. (2016). Self-Efficacy, Self-Esteem, and  
47 Subjective Happiness of Teacher Candidates at the Pedagogical Formation  
48 Certificate Program. *Journal of Education and Training Studies*, 4(8), 72-82.  
49  
50  
51 46. Martinez, C. T., & Scott, C. (2014). In Search of the Meaning of Happiness through  
52 Flow and Spirituality. *International Journal of Health, Wellness & Society*, 4(1), 37-  
53  
54  
55  
56  
57  
58  
59  
60



- 1  
2  
3 47. Etemadifar, S., Hosseiny, R. S., Ziraki, A., Omrani, A., & Alijanpoor, M. (2016).  
4  
5 The Relationship Between Spiritual Well-Being and Life Satisfaction in Females  
6  
7 With Infertility. *Women's Health Bull*, 3(4), e32344. doi:10.17795/whb-32344  
8  
9
- 10 48. Lee, D. S., & Padilla, A. M. (2016). Predicting South Korean university students'  
11  
12 happiness through social support and efficacy beliefs. *International Journal for the*  
13  
14 *Advancement of Counselling*, 38(1), 48-60. doi:10.1007/s10447-015-9255-2  
15  
16
- 17 49. Calvo, R., Arcaya, M., Baum, C. F., Lowe, S. R., & Waters, M. C. (2015). Happily  
18  
19 ever after? Pre-and-post disaster determinants of happiness among survivors of  
20  
21 Hurricane Katrina. *Journal of Happiness Studies*, 16(2), 427-442.  
22  
23  
24 doi:10.1007/s10902-014-9516-5  
25
- 26 50. Brewin, C. R., Andrews, B., & Valentine, J. D. (2000). Meta-analysis of risk factors  
27  
28 for posttraumatic stress disorder in trauma-exposed adults. *Journal of Consulting*  
29  
30 *and Clinical Psychology*, 68(5), 748-766. doi:10.1037/0022-006X.68.5.748  
31  
32
- 33 51. Eaker, E. D. (2005). Social Support and Physical Health: Understanding the Health  
34  
35 Consequences of Relationships. *American Journal of Epidemiology*, 161(3), 297-  
36  
37 298. doi:10.1093/aje/kwi036  
38  
39
- 40 52. Arrebola-Moreno, A. L., Garcia-Retamero, R., Catena, A., Marfil-Álvarez, R.,  
41  
42 Melgares-Moreno, R., & Ramírez-Hernández, J. A. (2014). On the protective effect  
43  
44 of resilience in patients with acute coronary syndrome. *International Journal of*  
45  
46 *Clinical and Health Psychology*, 14(2), 111-119.  
47  
48
- 49 53. Kubzansky, L. D., & Thurston, R. C. (2007). Emotional vitality and incident  
50  
51 coronary heart disease: benefits of healthy psychological functioning. *Archives of*  
52  
53 *General Psychiatry*, 64(12), 1393-1401.  
54  
55  
56  
57  
58  
59  
60

Table 1. Factorial weights of the 16 items on each of the three factors and respective explained variance for the RECT sample.

| Items / Explained variance | Communalities | Self-Efficacy | Spirituality | Social Support |
|----------------------------|---------------|---------------|--------------|----------------|
| 19                         | 0.44          | 0.65          | 0.05         | 0.11           |
| 24                         | 0.28          | 0.47          | 0.20         | 0.10           |
| 15                         | 0.33          | 0.57          | -0.01        | 0.08           |
| 18                         | 0.28          | 0.52          | -0.07        | 0.06           |
| 7                          | 0.35          | 0.53          | -0.01        | 0.28           |
| 8                          | 0.33          | 0.56          | 0.08         | 0.11           |
| 1                          | 0.30          | 0.52          | 0.04         | 0.14           |
| 16                         | 0.30          | 0.53          | 0.01         | 0.14           |
| 4                          | 0.40          | 0.61          | 0.14         | 0.00           |
| 6                          | 0.24          | 0.39          | 0.16         | 0.25           |
| 10                         | 0.18          | 0.35          | 0.20         | 0.11           |
| 9                          | 0.50          | 0.10          | 0.69         | 0.08           |
| 21                         | 0.45          | 0.14          | 0.60         | 0.28           |
| 3                          | 0.48          | -0.06         | 0.69         | 0.02           |
| 2                          | 0.38          | 0.18          | 0.13         | 0.58           |
| 13                         | 0.72          | 0.17          | 0.16         | 0.82           |
| Variance explained         | -             | 20%           | 9%           | 8%             |
| Alpha                      | -             | 0.82          | 0.71         | 0.53*          |
| M (SD)                     | -             | 2.92 (0.54)   | 2.64 (0.91)  | 3.14 (0.83)    |
| N                          | -             | 421           | 421          | 421            |

\* correlation for the two items,  $p < 0.05$

Table 2. Factorial weights of the 16 items on each of the three factors and respective explained variance for the HIAES sample.

| Items / Explained variance | Communalities | Self-Efficacy | Spirituality | Social Support |
|----------------------------|---------------|---------------|--------------|----------------|
| 19                         | 0.36          | 0.58          | -0.07        | 0.13           |
| 24                         | 0.33          | 0.57          | 0.02         | 0.09           |
| 15                         | 0.32          | 0.56          | -0.04        | 0.07           |
| 18                         | 0.28          | 0.52          | -0.07        | 0.07           |
| 7                          | 0.26          | 0.51          | 0.08         | 0.02           |
| 8                          | 0.24          | 0.48          | 0.04         | 0.08           |
| 1                          | 0.26          | 0.43          | 0.06         | 0.27           |
| 16                         | 0.19          | 0.43          | 0.08         | 0.04           |
| 4                          | 0.16          | 0.38          | 0.04         | 0.13           |
| 6                          | 0.12          | 0.33          | 0.12         | 0.05           |
| 10                         | 0.18          | 0.33          | 0.19         | 0.19           |
| 9                          | 0.52          | 0.08          | 0.72         | 0.00           |
| 21                         | 0.37          | 0.09          | 0.60         | 0.07           |
| 3                          | 0.36          | -0.06         | 0.59         | 0.13           |
| 2                          | 0.59          | 0.09          | 0.06         | 0.76           |
| 13                         | 0.35          | 0.21          | 0.14         | 0.54           |
| Variance explained         | -             | 16%           | 8%           | 7%             |
| Alpha                      | -             | 0.76          | 0.67         | 0.44*          |
| M (SD)                     | -             | 3.03 (0.40)   | 2.47 (0.84)  | 3.24 (0.67)    |
| N                          | -             | 405           | 405          | 405            |

\* correlation for the two items,  $p < 0.05$

Table 3. Descriptives (mean, standard-deviation and sample size) of the measures used to test the convergent validity.

|        | M     | SD    | n   |
|--------|-------|-------|-----|
| SPS    | 8.75  | 9.36  | 53  |
| SWLS   | 24.72 | 5.26  | 54  |
| PSS-10 | 14.51 | 5.49  | 55  |
| 23QVS  | 28.67 | 9.44  | 55  |
| H&LS   |       |       |     |
| Phea   | 1.38  | .52   | 405 |
| Pact   | 3.14  | 1.45  | 405 |
| Mcons  | 2.58  | 1.67  | 405 |
| BI     |       |       |     |
| Met    | .12   | .32   | 260 |
| Card   | 3.31  | 2.03  | 405 |
| MHI-5  | 68.91 | 18.97 | 405 |
| SHS    | 5.24  | 1.08  | 405 |

Table. 4. Bivariate correlation coefficients between the CD-RISC scale and the measures used to test the convergent validity.

|                   | 1      | 2                | 3                 |
|-------------------|--------|------------------|-------------------|
| 1. Self-Efficacy  | -      | .13**            | .33**             |
| 2. Spirituality   | .13**  | -                | .21**             |
| 3. Social Support | .33**  | .21**            | -                 |
| H&LS - Phea       | -.16** | -.01             | -.09              |
| H&LS - Pact       | .08    | .00              | .08               |
| H&LS - Mcons      | -.13** | .08              | -.04              |
| BI - Met          | -.04   | .02              | -.13*             |
| BI - Card         | .07    | .01              | -.10*             |
| MHI-5             | .35**  | .02              | .26**             |
| SHS               | .31**  | .09              | .30**             |
| SPS               | .16    | -.13             | .48**             |
| SWLS              | .28*   | .10              | .11               |
| PSS-10            | -.32*  | .14              | .10               |
| 23QVS             | -.34*  | .25 <sup>+</sup> | -.24 <sup>+</sup> |

<sup>+</sup> p<0.06; \* p<0.05; \*\*p<0.01

1  
2  
3  
4  
5 Author's contribution  
6

7  
8 Faria-Anjos, Joana  
9

10 Responsible for the CD-RISC scale translation process; substantial contribution to the  
11 conception and design of the work, acquisition, analysis and interpretation of data;  
12 drafting the work; agreement to be accountable for all aspects of the work related with  
13 integrity of the data analysis and results reporting; and final approval of the version to  
14 be published.  
15  
16  
17  
18  
19

20  
21 Accountable for the following sections: Introduction, Method, Results and Discussion.  
22  
23  
24  
25  
26  
27

28 Heitor, Maria João  
29

30 Substantial contribution to the conception and design of the work, acquisition, analysis  
31 and interpretation of data; drafting the work; agreement to be accountable for all aspects  
32 of the work related with integrity of the data analysis and results reporting; and final  
33 approval of the version to be published.  
34  
35  
36  
37  
38

39 Accountable for the following sections: Introduction, Method, Results and Discussion.  
40  
41  
42  
43  
44  
45  
46

47 Ribeiro, Maria Teresa  
48

49 Substantial contribution to the conception and design of the work, acquisition, analysis  
50 and interpretation of data; revising the work critically; agreement to be accountable for  
51 all aspects of the work related with integrity of the data analysis and results reporting;  
52 and final approval of the version to be published.  
53  
54  
55  
56  
57

58 Accountable for the following sections: Introduction, Method, Results and Discussion.  
59  
60

1  
2  
3  
4  
5  
6  
7  
8 Moreira, Sérgio

9  
10 Substantial contributions to the analysis and interpretation of data for the work; drafting  
11 the work and revising it critically; agreement to be accountable for all aspects of the  
12 work related with integrity of the data analysis and results reporting; and final approval  
13 of the version to be published.  
14  
15  
16  
17  
18

19 Accountable for the following sections: Method, Results and Discussion.  
20  
21  
22  
23  
24

25 **Acknowledgments:** We thank Carla Crespo and Maria Violante Doria for their support  
26 in the CD-RISC scale translation process, and also to all the colleagues and institutions  
27 that supported us in the data collection (namely, Joana Carreiras and Susana Oliveira).  
28  
29 We thank Professor Jonathan Davidson for his helpful feedback throughout this process  
30 of paper construction.  
31  
32  
33  
34  
35  
36  
37  
38  
39  
40  
41  
42  
43  
44  
45  
46  
47  
48  
49  
50  
51  
52  
53  
54  
55  
56  
57  
58  
59  
60

# BMJ Open

## Connor-Davidson Resilience Scale: Validation study in a Portuguese sample

|                                 |                                                                                                                                                                                                                                                                                                                                                                                                                                                                      |
|---------------------------------|----------------------------------------------------------------------------------------------------------------------------------------------------------------------------------------------------------------------------------------------------------------------------------------------------------------------------------------------------------------------------------------------------------------------------------------------------------------------|
| Journal:                        | <i>BMJ Open</i>                                                                                                                                                                                                                                                                                                                                                                                                                                                      |
| Manuscript ID                   | bmjopen-2018-026836.R2                                                                                                                                                                                                                                                                                                                                                                                                                                               |
| Article Type:                   | Research                                                                                                                                                                                                                                                                                                                                                                                                                                                             |
| Date Submitted by the Author:   | 21-Feb-2019                                                                                                                                                                                                                                                                                                                                                                                                                                                          |
| Complete List of Authors:       | Faria-Anjos, Joana; Universidade de Lisboa Faculdade de Psicologia, ; Instituto Nacional de Emergencia Medica IP, Heitor dos Santos, Maria; Universidade de Lisboa Faculdade de Medicina, Instituto de Medicina Preventiva e Saúde Pública & Instituto de Saúde Ambiental; Hospital Beatriz Angelo, Psiquiatria e Saúde Mental Ribeiro, Maria Teresa; Universidade de Lisboa Faculdade de Psicologia Moreira, Sergio; Universidade de Lisboa Faculdade de Psicologia |
| <b>Primary Subject Heading</b>: | Mental health                                                                                                                                                                                                                                                                                                                                                                                                                                                        |
| Secondary Subject Heading:      | Global health, Mental health                                                                                                                                                                                                                                                                                                                                                                                                                                         |
| Keywords:                       | MENTAL HEALTH, resilience, exploratory factor analysis, confirmatory factor analysis, convergent validity                                                                                                                                                                                                                                                                                                                                                            |
|                                 |                                                                                                                                                                                                                                                                                                                                                                                                                                                                      |

SCHOLARONE™  
Manuscripts



1  
2  
3  
4  
5  
6  
7 Title: Connor-Davidson Resilience Scale: Validation study in a Portuguese sample  
8  
9  
10

11 Authors:

12 Joana FARIA-ANJOS

13 Faculdade de Psicologia – Universidade de Lisboa

14 Alameda da Universidade; 1649-013 Lisboa – Portugal.

15  
16  
17 Instituto Nacional de Emergência Médica – Portugal  
18  
19

20  
21 Maria João HEITOR DOS SANTOS

22 Instituto de Medicina Preventiva e Saúde Pública & Instituto de Saúde Ambiental,

23 Faculdade de Medicina, Universidade de Lisboa, Portugal  
24

25 Departamento de Psiquiatria e Saúde Mental, Hospital Beatriz Ângelo, Loures, Portugal

26 Loures, Lisboa, 2674-514, Portugal  
27  
28  
29

30 Maria Teresa RIBEIRO

31 Faculdade de Psicologia – Universidade de Lisboa

32 Alameda da Universidade; 1649-013 Lisboa – Portugal.  
33  
34  
35

36 Sérgio MOREIRA

37 Faculdade de Psicologia – Universidade de Lisboa

38 Alameda da Universidade; 1649-013 Lisboa – Portugal.  
39  
40  
41

42 Corresponding author:

43 Joana Faria-Anjos

44 Alameda da Universidade; 1649-013 Lisboa – Portugal. E-mail:

45 joana.f.anjos@gmail.com; Phone number: +351936010735.  
46  
47  
48

49 **Key-words:** mental health; resilience; confirmatory factorial analysis; exploratory

50 factorial analysis; convergent validity.  
51  
52  
53  
54  
55

56 **Word count:** 7470 words (with references)  
57  
58  
59  
60

## Abstract

**Objective:** The objective of this paper is to evaluate the structural validity and convergent validity of the first Portuguese version of Connor- Davidson Resilience Scale (CD-RISC, 2003). **Settings:** The datasets come from two studies conducted in Portugal, respectively, from the Resilience Effect in Coping with Trauma (RECT) project and from the Health Impact Assessment of Employment Strategies (HIAES) project. **Participants:** The sample is composed by 476 participants from RECT project and 405 participants from the HIAES project. In both projects convenience samples were used. **Measures:** The original CD-RISC items were translated to Portuguese and used in a survey along with additional psychosocial and biomedical measures. **Results:** Independent Exploratory Factorial Analysis (EFA) with each of the two samples revealed that the best solution in both samples had 3 factors consistent with the Self-Efficacy, Spirituality and Social Support factors from the original scale. A Confirmatory Factor Analysis (CFA) using the two samples together and specifying the 3 factors from the EFA revealed a good overall fit and, comparatively, better fit than a model specified with the 5 factors from the original scale. The study of the convergent validity revealed that bivariate correlations between the 3 factors and validated measures of stress, life satisfaction, mental health and physical health are globally consistent with previous research. **Conclusions:** This study makes available to the broad Community of Portuguese Language Countries a validated measure of resilience extensively used for research and intervention. The results encourage future studies using this translated version of CD-RISC to explore further the three factors structure found here and to test the convergent validity with new samples.

## Article Summary

- Uses a Large sample of Portuguese participants studied with rigorous data collection protocols provide the right context to test the CD-RISC psychometric properties in the context of the Portuguese population.
- Applies sound validated data analysis methodologies (following Green and colleagues) for testing the structural validity.
- Makes available a tested (and validated by the original CD-RISC authors) translated version to the Portuguese speaking community.
- Has two different samples, requiring the adaptation of commonly used psychometric analysis.
- The two different samples also resulted in differences in test power for the convergent validity analysis.

## Funding statement

The Health Impact Assessment of Employment Strategies project (HIAES) was funded by The Office of the High Commissioner for Health followed by the General Health Direction.

## Competing interests

There are no competing interests.

## Introduction

Resilience can be described as a dynamic process of adaptively overcoming stress and adversity while maintaining normal psychological and physical functioning, and not merely the absence of psychopathology. [1] As an individual characteristic, resilience is likely influenced by external variables, such as adequate social support, that reduce risk for stress-related mental disorders by buffering the impact of stress.[2]

In a quantitative methodological review for searching, screening and appraising resilience scales quality, the Connor-Davidson Resilience Scale (CD-RISC), the Resilience Scale for Adults and the Brief Resilience Scale received the best psychometric ratings.[3]

Based on the perspective that resilience is a personal quality that reflects the ability to cope with stress, Connor and Davidson[4] developed a brief self-report scale to quantify resilience. The original version of CD-RISC has 25 self-rated items, each of them rated a 5-point scale from 0 ('not true at all') to 4 ('true nearly all the time'). Despite the absence of a proposed cut-off value, higher scores represent higher resilience. The CD-RISC was developed with participants from different settings, including the general population, primary care outpatients, psychiatric inpatients, and clinical trial patients.[4]The CD-RISC is a generic measure which can be applied to different populations since it was not developed for a specific group.[5]The original study demonstrated solid psychometric properties, with good internal consistency and test-retest reliability, with validity being demonstrated with other measures of stress and hardiness.[4] It suggested that resilience is modifiable and can improve with treatment. Further research on violent trauma showed that survivors who exhibit better health or less distress from the trauma are more resilient.[6]

1  
2  
3 The CD-RISC has been translated into over fifty languages and has been tested in  
4 several different contexts and specific populations: on general population[7-9]; post-  
5 9/11 U.S. military veteran[10]; United States Air Force[11]; adolescents[12]; university  
6 students[13,14]; young adults[15]; older adults[16]; earthquake survivors[5];  
7 adolescents' earthquake survivors[17]; homeless youth[18]; caregivers with chronic  
8 stress[19]; people with spinal cord injuries[20]; rehabilitation patients after  
9 unintentional injury[21]; sport performers[22], among many others.

10 Preliminary studies of the scale revealed that the CD-RISC has a multifactorial  
11 structure. Connor and Davidson[4] performed exploratory factor analysis, using the  
12 adults sample from general population. The factor analyses yielded 5 factors, named as  
13 *personal competence, high standards, and tenacity; trust in one's instinct, tolerance of*  
14 *negative affect and strengthening effects of stress; positive acceptance of change and*  
15 *secure relationships with others; control; spiritual influences.* Nevertheless, the CD-  
16 RISC factor structure still needs to be clarified since subsequent studies found different  
17 factor structures.

18 Prince-Embury[23] suggests that the instability of factor structure might have been  
19 related to insufficient numbers of items covering various aspects of the original  
20 construct and that factor structure differences would be expected in studies of groups  
21 that varied culturally and demographically.

22 Therefore, the objective of this study was to evaluate the psychometric properties of the  
23 CD-RISC Portuguese version with the aim of determining whether it can be used as a  
24 reliable and valid tool to assess Portuguese population resilience.

## Method

The study of CD-RISC psychometric properties and convergent validity was conducted with data sets coming from two studies.

The first data set comes from a research project on Resilience Effect in Coping with Trauma (RECT) in Portugal, conducted at the Faculty of Psychology of the University of Lisbon. This research project was reviewed by the Ethical Committee of the University of Lisbon – Faculty of Psychology and granted authorization to perform these studies. The second data set comes from a project on Health Impact Assessment of Employment Strategies (HIAES) in Portugal, which was approved by two institutional ethical committees, the Ethics Committee for Health of the National Institute of Health Doutor Ricardo Jorge, Public Institute and the Ethics Committee for Health of the Lisbon / North Hospital Center of Faculty of Medicine of the University of Lisbon. It was also approved by the National Commission of Data Protection. This research was conducted under the Helsinki declaration code of ethics.

## Sample

The RECT project has a convenience sample of 476 participants (44% female participants) comprised by master students, technical course of medical emergency students, and general population. Participants from the HIAES project consist of 405 workers (51% female participants) at a private mutualistic financial institution - Associação Mutualista Caixa Económica Montepio Geral (CEMG) – and is also a convenience non-probabilistic sample. Descriptive data from the two samples for general sociodemographic variables show noteworthy differences in age and education. Regarding the age of the participants, the mean for the RECT sample was 26

1  
2  
3 (SD=6.24), while the HIAES project's mean was 41 (SD=8.3). Concerning the  
4  
5 education variable, the RECT project's sample was composed mostly of participants  
6  
7 with a high school degree (58%), followed by middle school (27%) and graduate or  
8  
9 higher (15%) degrees. The HIAES project's sample, however, had a higher percentage  
10  
11 of participants with a graduate or higher degree (69%), followed by high school (30%)  
12  
13 and middle school (1%) degrees.  
14  
15  
16  
17  
18  
19  
20  
21

## 22 **Instruments**

23  
24 Besides the CD-RISC Scale, we also collected data for a set of other measures relevant  
25  
26 to each project objective. In this section we only describe the CD-RISC and the  
27  
28 measures relevant to test for convergent validity. It is important to note that different  
29  
30 data were collected in each of the samples and, also, for different groups within each  
31  
32 sample.  
33  
34  
35  
36

### 37 **Connor-Davidson Resilience Scale (CD-RISC)**

38  
39 The CD-RISC[4] is a scale developed to quantify psychological resilience and the  
40  
41 clinical effects of the treatment of anxiety and depression. It is composed by 25 items  
42  
43 measured in a 5 points scale (0 - not true to 4 - almost always true) and the original  
44  
45 study describes five factors: the notion of personal competence, high standards, and  
46  
47 tenacity; trust in one's instincts, tolerance of negative affect, and strengthening effects  
48  
49 of stress; positive acceptance of change, and secure relationships; control; and finally,  
50  
51 spiritual influences. Despite the Connor & Davidson's original study corroborating  
52  
53 these five factors, latter studies have reported support for only one factor.[5]  
54  
55  
56  
57  
58  
59  
60

### Additional measures

A set of additional 8 measures were collected in these two studies. More specifically, in the RECT project the following measures were collected.

- Social Provisions Scale (SPS), an instrument that measures perceived social support.[24] Here we used the Portuguese version developed by Moreira and Canaipa.[25]
- Satisfaction With Life Scale (SWLS), an instrument that measures life satisfaction based on the subjective judgement done by each person, accordingly to his own pattern of life satisfaction.[26] We used the Portuguese adaptation of the scale conducted by Simões.[27]
- Perceived Stress Scale (PSS-10), a reduced version of PSS,[28, 29] an instrument used to measure the perception of stress. We used the Portuguese adaptation of the PSS-10 described by Rocha.[30]
- Stress Vulnerability Questionnaire (23QVS), a measure of the individual's vulnerability to stress.[31]

In the HIAES project 4 additional measures were collected:

- Health and life styles (H&LS) information regarding perceived health (measured using a single item - "How would you classify your general health state during the last three months?" - and a three points Likert), the practice of physical exercise (measured using both a practice frequency and a practice quality scales) and medication consumption (measured using a dichotomous scale – yes versus no - for a set of fourteen clinical conditions).



- Biomedical indexes (BI) measured by means of blood samples, anthropometric parameters and blood pressure.
- Mental Health Inventory (MHI-5), the reduced version of the MHI Ribeiro 2001[32] that measures psychological stress and well-being using 5 items and a frequency scale of 1, always, to 6, never. Here, we used a Portuguese adaptation of the MIH-5 described by Ribeiro.[33]
- Subjective Happiness Scale (SHS), a measure of subjective happiness originally developed by Lyubomirsky and Lepper,[34] composed by four items responded on a Likert 7 points scale. Again, we used a Portuguese version described by Pais-Ribeiro.[35]

## **Procedure**

### **Translation and adaptation to the Portuguese Language**

The CD-RISC items were translated through a process of translation and back-translation from the original American scale[4] by specialists in psychology and fluent in both Portuguese and English, and finally approved by the original CD-RISC authors.

### **Survey procedure**

For the RECT data a survey was conducted between April 2009 and May 2010. The questionnaires were administered in paper and pencil format. This was done either face to face or administered in a classroom context. The CD-RISC scale was completed by 421 participants while 55 participants completed the additional convergent validity measures.

1  
2  
3 For the HIAES data a survey was conducted between November 2012 and June 2013.  
4  
5 The survey had two parts: The first part of the survey with sociodemographic  
6  
7 information and H&LS, MHI-5 and SHS scales was completed electronically while, on  
8  
9 a second part, the participants completed the Connor-Davidson Resilience Scale (CD-  
10  
11 RISC) in paper and pencil format. Additionally, for a subsample of 260, anthropometric  
12  
13 measures and blood samples were collected.  
14  
15

16  
17 All the participants, from both research projects, were informed of the investigation and  
18  
19 gave their signed informed consent. The participants were not involved in the design  
20  
21 and planning of the study.  
22  
23  
24  
25  
26  
27

### 28 **Structural validity**

29  
30 The main objective of this paper was to study the structural validity of the Portuguese  
31  
32 version of the CD-RISC. We followed Green and colleagues'[10] procedure where an  
33  
34 Exploratory Factorial Analysis (EFA) was used to test the factorial structure of the  
35  
36 original 25-item 5-factor solution version of the CD-RISC and afterwards a  
37  
38 Confirmatory Factor Analysis (CFA) was used to compare a proposed solution based on  
39  
40 the EFA results with Connor and Davidson's original one. We note that this  
41  
42 methodology used by Green and colleagues is particularly suited for our type of data.  
43  
44 More specifically, this methodology allows to understand the specific behavior of the  
45  
46 items in each of the two samples and only then to test of the factorial structure of the  
47  
48 scale with the complete sample.  
49  
50  
51  
52  
53

54 Two independent EFAs were conducted in each one of the two data sets. In this  
55  
56 analysis, the following criteria were taken into account. First, to determine the number  
57  
58 of factors we considered the criteria an eigenvalue higher than 0.7. Second, for the  
59  
60

1  
2  
3 interpretation of the items in each factor there were considered the oblimin rotated  
4 solutions once it is expected that the factors correlate among themselves. Additionally,  
5 for an item to be held for a particular factor communalities should be higher than 0.09,  
6 and loadings equal or higher to 0.32 and also cross-loadings lower to 0.32.[36] Finally,  
7 the resulting items in a factor were tested for internal consistency using Cronbach alpha.

8  
9  
10 Following the EFA, two CFAs were conducted using the complete sample to test and  
11 compare both the proposed solution as specified by EFA and the original 25-item 5-  
12 factor solution. The statistical quality of the models was assessed using two sets of  
13 measures. First, measures of the overall goodness of fit measures considering the  
14 following criteria: SRMR and RMSEA lower or equal to 0.08, Comparative Fit Index  
15 (CFI) and Tucker-Lewis Index (TLI) higher or equal to 0.90. Additionally, measures of  
16 the localized areas of strain with the following criteria: standardized residuals lower or  
17 equal to 2.58 and general modification indexes analysis lower or equal to 4.

18 Both analysis used pairwise deletion for missing data. Results were compared with a  
19 mean replacement method and no differences were found.  
20  
21  
22  
23  
24  
25  
26  
27  
28  
29  
30  
31  
32  
33  
34  
35  
36  
37  
38  
39  
40  
41  
42  
43  
44

### **Convergent validity**

45 Another aim of the present paper is to provide data for the convergent validity of the  
46 CD-RISC. The convergent validity is a form of validation that tests for the association  
47 between a construct measured by a scale and other measures that theoretically relate to  
48 this construct.[37, 38] For the convergent validity of the CD-RISC, variables used in the  
49 survey of the HIAES and RECT project were selected and bivariate correlations were  
50 computed. First, due to the sample dimension and the characteristics of the variables  
51 studied, only correlations with a p-value equal or lower than 0.01 are considered  
52  
53  
54  
55  
56  
57  
58  
59  
60

1  
2  
3 statistically significant.[39] Second, for the interpretation we considered correlation  
4  
5 values inferior to 0.20 as weak correlations, between 0.20 and 0.60 as moderate  
6  
7 correlations, and higher than 0.60 strong correlations.  
8  
9

## 10 11 12 13 **Results**

### 14 15 16 **Structural validity**

#### 17 18 19 **Exploratory Factorial Analysis**

20  
21  
22 A first set of EFAs were conducted on each data sample forcing the 25-items to the  
23  
24 original 5-factor solution and, following Karairmak[5] and Burns and Anstey,[15] to 3-  
25  
26 factor and 1-factor solutions. The results on both data set indicated that none of the  
27  
28 solutions replicated corresponding results. In fact, the factor structure for the 5 and 3-  
29  
30 factor solutions did not hold, and for the three solutions tested several items revealed  
31  
32 low communalities, low loadings and cross loadings in both samples. In line with this,  
33  
34 items 5, 11, 12, 14, 17, 20 and 23 were excluded because of systematic problems in the  
35  
36 different solutions. A second set of EFAs were conducted with the 18-items for each  
37  
38 data sample. Once the original 5-factor and 3-factor solutions could no longer be  
39  
40 interpreted, we used the scree-plot to choose the best solution. The results on both data  
41  
42 sets showed that the best solution had 3 factors but items 22 and 25 still revealed  
43  
44 problematic. A final set of EFAs was conducted with the 16-items. Results showed that  
45  
46 the best solution in both samples had 3 factors with, respectively, 37% and 31% of  
47  
48 explained variance (  
49  
50  
51  
52  
53  
54

55 Table 1

56  
57  
58 Table 2  
59  
60

1  
2  
3  
4  
5  
6 and Table ). Factor 1 was the most representative factor, composed of 11 items and  
7  
8 explained, respectively, 20% and 16% of variance, and an alpha of 0.82 and 0.76. This  
9  
10 factor, that we labeled **Self-Efficacy**, describes individuals' beliefs about not only their  
11  
12 personal competence while dealing with challenging demands, but also their ability to  
13  
14 exercise control over their own functioning. Factor 2 was composed of 3 items and  
15  
16 explained, respectively, 9% and 8% of variance, and an alpha of 0.71 and 0.67. This  
17  
18 factor was named **Spirituality** and evaluates specific aspects of spirituality, namely the  
19  
20 belief that life has a purpose and that spiritual forces can influence earthly events.  
21  
22 Finally, Factor 3 was composed of 2 items and explained, respectively, 8% and 7% of  
23  
24 variance, and an alpha of 0.53 and 0.44. This factor refers to the perceived **Social**  
25  
26 **Support**, and evaluates how people perceive their reliance on others for emotional and  
27  
28 functional support. We note that the alphas for Self-Efficacy and Spirituality are above  
29  
30 0.7. Also, for the Social Support, once there were only two items, we used bivariate  
31  
32 correlations. Here the results show a moderate association between the two items.  
33  
34  
35  
36  
37  
38  
39 A descriptive analysis of the three subscales show that the average results for Self-  
40  
41 Efficacy are above the mid-point of the scale and have small standard deviations (SD)  
42  
43 on both RECT and HIAES samples, respectively, 2.92 (SD=0.54) and 3.03 (SD=0.40).  
44  
45 The same applies to the average results and standard deviations of the Spirituality  
46  
47 subscale, respectively 2.64 (SD=0.91) and 2.47 (SD=0.84), and of the Social Support  
48  
49 subscale, respectively 3.14 (SD=0.83) and 3.24 (SD=0.67).  
50  
51  
52  
53  
54  
55

56 Table 1

57  
58 Table 2  
59  
60

## Confirmatory Factorial Analysis

CFA was conducted to test the model specified by EFA and to compare this model with the one suggested by Connor and Davidson's original five-factor solution. Considering the meaning of both the proposed three factors solution and the original five-factors solution, in both cases the CFAs were computed allowing for factors to correlate among themselves.

A preliminary analysis of the frequency distributions and statistics for skewness and kurtosis of CD-RISC show severe negative asymmetry of the data in most of the 25 items. To reduce the impact of the data distributions on the model computations, we log transformed all the data (note that the data was previously transformed to eliminate zero values by adding a constant, and afterwards all the results were inverted). The asymmetry of the resulting log transformed frequency distributions for the 25 items were significantly reduced and consequently used in the CFA.

The results for the proposed 16-item 3-factors solution reveal a good overall fit,  $\chi^2(101) = 368.64$ ,  $p < .001$ ; SRMR = .05, RMSEA = .06 [.05, .06], CFI = .90, TLI = .89. The analysis also shows that few standardized residuals are higher than 2.58 and, similarly, few modification indexes are above 4. Finally, all items were highly correlated with their factors, with all correlations between .40 and .77 and all  $ps < .001$ .

The results for the original 25-item 5-factor solution reveal a moderate overall fit, with both CFI and TLI measures slightly below the criteria,  $\chi^2(263) = 1219.08$ ,  $p < .001$ ; SRMR = .06, RMSEA = .07 [.06, .07], CFI = .82, TLI = .79. Additionally, the analysis also shows several standardized residuals above the criteria and, similarly, several modification indexes are above 4. All items were significantly correlated with their

factors (all  $ps < .001$ ), but correlations ranged between a weak .20 and strong .70.

Overall, the proposed 16-item 3-factors solution had better performance in the CFA.

### **Convergent validity**

Six of the 8 measures used to test the convergent validity (i.e., SPS, SWLS, PSS-10, 23QVS, MHI5 and SHS) were tested for the structural validity on their unidimensional versions (Table 3). Results all levels of explained variance are above 40% all Cronbach alphas' above 80. The sole exception to these results is the 23QVS with a somewhat lower explained variance of 23% and alpha of 0.76. Additionally, for the H&LS we consider a single item on physical health (Phea) and two indexes, one on physical activity (Pact) using the average of the frequency of psychical activity and of commitment to the physical activity, and an index on medication consumption (Mcons), consisting in the sum of the answers for medication consumption regarding 14 clinical conditions. Finally, for the BI we computed an index to identify the presence of metabolic syndrome (Met) using the recommendations of the European Society of Cardiology (ESC, <http://www.escardio.org>) and an index for cardiovascular risk (Card) based on the norms of the Portuguese Society of Cardiology (SPC, [www.spc.pt](http://www.spc.pt)).

Table 3

Table 4

Bivariate correlations were computed between each one of the three subscales, computed based on the 16-items in the CD-RISC, and each of the 8 measures described above and used to test the convergent validity (Table. 4. Bivariate correlation

1  
2  
3 coefficients between the CD-RISC scale and the measures used to test the convergent  
4 validity.  
5  
6

7  
8 ). The self-efficacy factor showed a significant negative association with the two  
9 measures of stress considered - perceived stress ( $r=-0.32$ ) and vulnerability to stress ( $r=-$   
10  $0.34$ ). There were positive correlations between the self-efficacy factor and two  
11 additional variables, namely, subjective happiness ( $r=0.31$ ) and mental health ( $r=0.35$ ).  
12 Although moderately, the self-efficacy factor as a significant and negative correlation  
13 with physical health ( $r=-0.17$ ) and medication consumption ( $r=-0.13$ )<sup>1</sup>.  
14  
15

16  
17 The spirituality factor showed only a marginal significant correlation with the  
18 vulnerability to stress measure ( $r=0.25$ ).  
19  
20

21  
22 The social support factor showed a moderate significant correlation ( $r=0.48$ ) with the  
23 Social Provision Scale.[24] The social support factor is also correlated with the SHS  
24 ( $r=0.30$ ) and MHI5 ( $r=0.26$ ) scales. There were a marginal significant negative  
25 correlation between social support and vulnerability to stress ( $r=-0.24$ ). The social  
26 support factor correlates significantly with metabolic syndrome ( $r=-0.13$ ) and  
27 cardiovascular risk ( $r=-0.10$ ), although the magnitude of both correlations is weak.  
28  
29

30  
31 The data that support the findings of this study are openly available in figshare at  
32 <https://doi.org/10.6084/m9.figshare.7111676.v1>.  
33  
34  
35  
36  
37  
38  
39  
40  
41

## 42 43 44 45 46 47 48 49 **Discussion**

50  
51 The objective of this paper is to evaluate the structural validity and convergent validity  
52 of the first Portuguese version of the CD-RISC. Despite the importance of this  
53  
54  
55  
56  
57

58  
59  
60  

---

<sup>1</sup> “Note that physical health is measured using a single item where the higher the value the lower the physical health reported”.



1  
2  
3 construct, to date, there is no validated scale to measure resilience in the Community of  
4 Portuguese Language Countries (CPLP, n.d.), estimated to be more than two hundred  
5 and seventy million people. Resilience is a fundamental element of mental health, health  
6 assets, capabilities and positive adaptation. It enables people both to cope with adversity  
7 and to reach their full potential, and influences a wide range of outcomes at individual  
8 and community level, including healthier lifestyles, better physical health, improved  
9 recovery from illness, fewer limitations in daily living, higher educational attainment,  
10 greater productivity, employment and earnings, better relationships with adults and with  
11 children, more social cohesion and engagement and improved quality of life.[40]It is  
12 not a surprise that resilience has been extensively measured and used to understand  
13 individual and social phenomena.

14  
15 The results do not replicate the original five factors structure, instead, the results suggest  
16 a three factors structure with self-efficacy, spirituality, and social support dimensions  
17 represented. Although this result is not consistent with the original proposal from  
18 Connor and Davidson, it is consistent with more recent studies.[5, 41] Consistent with  
19 this, the variability of factor structures found in CD-RISC has been document and owed  
20 to methodological variations, idiosyncratic samples and, importantly, to cross-cultural  
21 factors.[42]We also note that similarly to the original study and to some of the  
22 following research, self-efficacy is the factor that explains the greatest variance of the  
23 original items. Still, although the results are important to understand the construct of  
24 resilience and how CD-RISC works as an instrument measuring this construct in a  
25 Portuguese sample, we note that the resulting scale should not be regarded as an  
26 improved version. In fact, we consider that improved usage of this scale would come  
27 from prior testing of the factorial structure of the original 25 items and comparison with  
28 the results of this paper and alike.

1  
2  
3 The results from the validation are, with one sole and justifiable exception, consistent  
4 with evidence from the literature. The negative association we found between the self-  
5 efficacy factor and the measures of stress is consistent with the idea that people with  
6 high efficacy beliefs are able overcome obstacles and focus on opportunities, and are  
7 more able to perceive stressful situations as challenging rather than as problematic  
8 events.[43] The positive correlations between self-efficacy and happiness and  
9 satisfaction with life are consistent with the findings in the literature where self-efficacy  
10 beliefs may regulate positive and negative emotions. In this sense, people with higher  
11 self-efficacy beliefs are less distressed and feel more capable of dealing with the  
12 problematic situations.[44] Recent studies have found that self-efficacy is indeed  
13 positively correlated with happiness[45] and satisfaction with life.[43] Although  
14 moderately, the negative correlation between the self-efficacy factor and the measures  
15 of physical health and medication consumption constitute an extension of the findings  
16 where self-efficacy is associated with increased health and life satisfaction.

17  
18  
19 The positive correlation we found between the spiritual factor and the vulnerability to  
20 stress is consistent with Connor and colleagues[6] study with survivors of violent trauma,  
21 where spirituality is proposed as a coping strategy do deal with higher Posttraumatic  
22 Stress Disorder scores. Still, the fact that spirituality does not relate with any other  
23 variables is not consistent with the literature, where previous studies have successfully  
24 established correlations between spirituality and happiness[46] and spirituality and life  
25 satisfaction.[47] The absence of effects can be a result of the low statistical power due  
26 to the small sample size in the RECT sample. In fact, a post hoc power analysis showed  
27 that the power to detect a significant correlation of 0.20 at 0.05 in our sample is only  
28 0.28.

1  
2  
3 Interestingly, the positive correlation we found between the social support and the  
4  
5 Social Provision Scale [24] is the only significant correlation of the Social Provision  
6  
7 Scale, which supports the assumptions that this factor is a specific dimension of  
8  
9 resilience. The positive correlations we found between the social support factor and the  
10  
11 SHS and MH15 scales are consistent with the findings in the literature showing the  
12  
13 strong impact of social support on happiness especially from closer social circles.[48]  
14  
15 For instance, in a study with survivors from a natural disaster, the authors found that  
16  
17 pre-disaster happiness and post-disaster social support were protective against the  
18  
19 negative effect of the hurricane on survivors' post-disaster happiness.[49] The negative  
20  
21 correlation we found between social support and vulnerability to stress is consistent  
22  
23 with the findings in the literature, in which is becoming increasingly consensual that the  
24  
25 lack of social support is an important risk factor in dealing with stressful and adverse  
26  
27 life events.[50] We found negative correlations between social support and metabolic  
28  
29 syndrome and cardiovascular risk Although some of the literature describes a  
30  
31 conflicting relation between social support and physical health,[51] it appears that social  
32  
33 support is negatively associated with cardiovascular death and that it protects against  
34  
35 recurrent events, the existing research involving the predictive relation between social  
36  
37 support/social networks and incidence of disease, specifically cardiovascular disease.  
38  
39 In summary, regarding the self-efficacy factor, we found associations with perceived  
40  
41 stress, vulnerability to stress, subjective happiness and mental health. Additionally, we  
42  
43 also found associations with perceived physical health and medication consumption,  
44  
45 what we consider to be an extension of the findings relating self-efficacy with health  
46  
47 and life satisfaction. Regarding the spirituality factor, we found only an association with  
48  
49 vulnerability to stress. This result is not consistent with the literature where spirituality  
50  
51 has been related with stress, happiness and life satisfaction. As mentioned, the absence  
52  
53  
54  
55  
56  
57  
58  
59  
60

1  
2  
3 of effects here are likely due to low test power. Finally, regarding the social support  
4 scale, we found association with the Social Provision Scale, subjective happiness,  
5 mental health and vulnerability to stress. Additionally, we also found an association  
6 with the two biomedical indexes used, specifically, cardiovascular risk and metabolic  
7 syndrome. Resilience, through its self-efficacy component, showed a protective effect  
8 on the extent of the myocardial infarction, by affecting the inflammatory  
9 response.[52] Emotional vitality, as part of healthy psychological functioning, may  
10 protect against risk of coronary heart disease (CHD).[53] Resilience could have life-  
11 saving effects. Prevention and intervention in CHD must involve not only measures to  
12 reduce psychological distress but should also focus on promoting positive emotions.  
13  
14  
15  
16  
17  
18  
19  
20  
21  
22  
23  
24  
25  
26  
27  
28  
29

### 30 **Applications for the Portuguese version of the CD-RISC**

31  
32 Our study extends the literature that has provided support on the importance of the  
33 construct of resilience, and, more particularly, on the use of CD-RISC as a reliable  
34 measure of this construct. In fact, using a robust psychometric method we replicated  
35 more recent studies describing three main dimensions of resilience. Additionally, using  
36 a vast array of validated measures we also showed how these factors are associated with  
37 scales, indexes and even behavioral measures in a way that is consistent with the  
38 literature. Importantly, these associations support the distinctiveness of the three factors,  
39 with different factors relating, as expected, with some different convergent measures.  
40  
41 Take for instance the strong correlation between the social support factor and the Social  
42 Provision Scale, and the stronger correlations between the self-efficacy factor and both  
43 stress and vulnerability to stress. A curious finding here is the specific association of  
44 self-efficacy with physical health and medication consumption and the association of  
45  
46  
47  
48  
49  
50  
51  
52  
53  
54  
55  
56  
57  
58  
59  
60

1  
2  
3 social support with two biomedical indexes, cardiovascular risk and metabolic  
4  
5 syndrome.  
6  
7

#### 8 Future directions and research limitations 9

10  
11 Our study extends the possibility to measure and investigate resilience in Portuguese  
12  
13 communities using a rigorously validated scale. Future studies with this community can  
14  
15 explore further the three factors structure of the CD-RISC and test for the convergent  
16  
17 validity with new samples. A limitation of the current paper is the difference in test  
18  
19 power between the two samples used to do the convergent validity. This is particularly  
20  
21 important because the low test power sample (from RECT project) included important  
22  
23 and unique validation measures and because the spirituality scale did not replicate  
24  
25 entirely the findings in the literature. Finally, and considering both research and  
26  
27 practice, future studies with the Portuguese communities can follow the factorial  
28  
29 structure found and validated. These studies can, again, provide additional support to  
30  
31 the theoretical and practical relevance of resilience and its dimensions as measured by  
32  
33 the CD-RISC.  
34  
35  
36  
37  
38  
39  
40  
41

#### 42 Abbreviations: 43

44  
45 23QVS: Stress Vulnerability Questionnaire  
46

47  
48 BI: Biomedical indexes  
49

50  
51 Card: cardiovascular risk  
52

53  
54 CD-RISC: Connor- Davidson Resilience Scale  
55

56  
57 CFA: Confirmatory Factor Analysis  
58

59  
60 CHD: Coronary heart disease

1  
2  
3 EFA: Exploratory Factorial Analysis  
4

5  
6 H&LS: Health and life styles  
7

8  
9 HIAES: Health Impact Assessment of Employment Strategies  
10

11  
12 Mcons: Medication consumption  
13

14  
15 Met: metabolic syndrome  
16

17  
18 MHI-5: Mental Health Inventory  
19

20  
21 RECT: Resilience Effect in Coping with Trauma  
22

23  
24 Pact: Physical activity  
25

26  
27 Phea: Physical health  
28

29  
30 PSS-10: Reduced version of Perceived Stress Scale  
31

32  
33 SHS: Subjective Happiness Scale (SHS),  
34

35  
36 SPS: Social Provisions Scale  
37  
38  
39  
40  
41  
42  
43  
44  
45  
46  
47  
48  
49  
50  
51  
52  
53  
54  
55  
56  
57  
58  
59  
60

## References

1. Rutten, B. P., Hammels, C., Geschwind, N., Menne-Lothmann, C., Pishva, E., Schruers, K., . . . Wichers, M. (2013). Resilience in mental health: linking psychological and neurobiological perspectives. *Acta Psychiatr Scand*, *128*(1), 3-20. doi:10.1111/acps.12095
2. McCrory, E., De Brito, S. A., & Viding, E. (2010). Research review: the neurobiology and genetics of maltreatment and adversity. *J Child Psychol Psychiatry*, *51*(10), 1079-1095. doi:10.1111/j.1469-7610.2010.02271.x
3. Windle, G., Bennett, K. M., & Noyes, J. (2011). A methodological review of resilience measurement scales. *Health Qual Life Outcomes*, *9*, 8. doi:10.1186/1477-7525-9-8
4. Connor, K. M., & Davidson, J. R. (2003). Development of a new resilience scale: the Connor-Davidson Resilience Scale (CD-RISC). *Depress Anxiety*, *18*(2), 76-82. doi:10.1002/da.10113
5. Karairmak, Ö. (2010). Establishing the psychometric qualities of the Connor-Davidson Resilience Scale (CD-RISC) using exploratory and confirmatory factor analysis in a trauma survivor sample. *Psychiatry Research*, *179*(3), 350-356. doi:10.1016/j.psychres.2009.09.012

- 1  
2  
3 6. Connor, K. M., Davidson, J. R., & Lee, L.-C. (2003). Spirituality, Resilience, and  
4 Anger in Survivors of Violent Trauma: A Community Survey. *Journal of Traumatic*  
5 *Stress, 16*(5), 487.  
6  
7
- 8  
9  
10 7. González, V. B. A., Sierra, M. T. C., Martínez, B. A., Martínez-Molina, A., &  
11 Ponce, F. P. (2015). An in-depth psychometric analysis of the Connor-Davidson  
12 Resilience Scale: calibration with Rasch-Andrich model. *Health & Quality of Life*  
13 *Outcomes, 13*(1), 1-12. doi:10.1186/s12955-015-0345-y  
14  
15
- 16  
17 8. Jung, Y.-E., Min, J.-A., Shin, A. Y., Han, S. Y., Lee, K.-U., Kim, T.-S., . . . Chae,  
18 J.-H. (2012). The Korean Version of the Connor-Davidson Resilience Scale: An  
19 Extended Validation. *Stress & Health: Journal of the International Society for the*  
20 *Investigation of Stress, 28*(4), 319-326. doi:10.1002/smi.1436  
21  
22
- 23  
24 9. Liu, D., Fairweather-Schmidt, A., Burns, R., & Roberts, R. (2015). The Connor-  
25 Davidson Resilience Scale: Establishing Invariance Between Gender Across the  
26 Lifespan in a Large Community Based Study. *Journal of Psychopathology &*  
27 *Behavioral Assessment, 37*(2), 340.  
28  
29
- 30  
31 10. Green, K. T., Hayward, L. C., Williams, A. M., Dennis, P. A., Bryan, B. C., Taber,  
32 K. H., MIRECC Working Group, Davidson, J.R.T., Beckham, J.C., Calhoun, P.C.  
33 (2014). Examining the Factor Structure of the Connor–Davidson Resilience Scale  
34 (CD-RISC) in a Post-9/11 US Military Veteran Sample. *Assessment, 21*(4), 443–  
35 451. doi:10.1177/1073191114524014  
36  
37
- 38  
39 11. Bezdjian, S., Schneider, K. G., Burchett, D., Baker, M. T., & Garb, H. N. (2016).  
40 Resilience in the United States Air Force: Psychometric Properties of the Connor-  
41 Davidson Resilience Scale (CD-RISC). *Psychological Assessment*.  
42  
43  
44  
45  
46  
47  
48  
49  
50  
51  
52  
53  
54  
55  
56  
57  
58  
59  
60  
doi:10.1037/pas0000370



- 1  
2  
3  
4  
5  
6  
7  
8  
9  
10  
11  
12  
13  
14  
15  
16  
17  
18  
19  
20  
21  
22  
23  
24  
25  
26  
27  
28  
29  
30  
31  
32  
33  
34  
35  
36  
37  
38  
39  
40  
41  
42  
43  
44  
45  
46  
47  
48  
49  
50  
51  
52  
53  
54  
55  
56  
57  
58  
59  
60
12. Jørgensen, I. E., & Seedat, S. (2008). Factor structure of the Connor-Davidson Resilience Scale in South African adolescents. *International Journal of Adolescent Medicine and Health*, 20(1), 23-32. doi:10.1515/IJAMH.2008.20.1.23
  13. Di Fabio, A., & Palazzeschi, L. (2012). Connor-Davidson Resilience Scale: Psychometric properties of the Italian version. = Connor-Davidson Resilience Scale: proprietà psicometriche della versione Italiana. *Counseling: Giornale Italiano di Ricerca e Applicazioni*, 5(1), 101-109.
  14. Khoshouei, M. S. k. m. y. c. (2009). Psychometric Evaluation of the Connor-Davidson Resilience Scale (CD-RISC) Using Iranian Students. *International Journal of Testing*, 9(1), 60-66. doi:10.1080/15305050902733471
  15. Burns, R. A., & Anstey, K. J. (2010). The Connor–Davidson Resilience Scale (CD-RISC): Testing the invariance of a uni-dimensional resilience measure that is independent of positive and negative affect. *Personality and Individual Differences*, 48(5), 527-531. doi:10.1016/j.paid.2009.11.026
  16. Serrano-Parra, M. D., Garrido-Abejar, M., Notario-Pacheco, B., Bartolomé-Gutierrez, R., Solera-Martínez, M., & Martínez-Vizcaino, V. (2012). Validez de la escala de Resiliencia de Connor-Davidson (CD-RISC) en una población de mayores entre 60 y 75 años. *Validity of the Connor Davidson Resilience scale (CD-RISC) in people from 60-to-75 years old.*, 5(2), 49-57.
  17. Yu, X.-n., Lau, J. T. F., Mak, W. W. S., Zhang, J., Lui, W. W. S., & Zhang, J. (2011). Factor structure and psychometric properties of the Connor-Davidson Resilience Scale among Chinese adolescents. *Comprehensive Psychiatry*, 52(2), 218-224. doi:10.1016/j.comppsy.2010.05.010
  18. Asante, K. O., & Meyer-Weitz, A. (2014). Measuring resilience among homeless youth: Psychometric assessment of the Connor-Davidson Resilience Scale in Ghana. *Journal of Psychology in Africa*, 24(4), 321-326.

- 1  
2  
3  
4  
5  
6  
7  
8  
9  
10  
11  
12  
13  
14  
15  
16  
17  
18  
19  
20  
21  
22  
23  
24  
25  
26  
27  
28  
29  
30  
31  
32  
33  
34  
35  
36  
37  
38  
39  
40  
41  
42  
43  
44  
45  
46  
47  
48  
49  
50  
51  
52  
53  
54  
55  
56  
57  
58  
59  
60
19. Crespo, M., Fernández-Lansac, V., & Soberón, C. (2014). Adaptación Española de la 'Escala de resiliencia de Connor-Davidson' (CD-RISC) en situaciones de estrés crónico. = Spanish version of the Connor-Davidson Resilience Scale (CD-RISC) for chronic stress situations. *Behavioral Psychology / Psicología Conductual: Revista Internacional Clínica y de la Salud*, 22(2), 219-238.
  20. Fujikawa, M., Lee, E.-J., Chan, F., Catalano, D., Hunter, C., Bengtson, K., & Rahimi, M. (2013). The Connor-Davidson Resilience Scale as a Positive Psychology Measure for People with Spinal Cord Injuries. *Rehabilitation Research, Policy, and Education*, 27(3), 213-222.
  21. Peng, L., Zhang, J., Chen, H., Zhang, Y., Li, M., Yu, Y., & Liu, B. (2014). Comparison among different versions of Connor-Davidson Resilience Scale (CD-RISC) in rehabilitation patients after unintentional injury. *African Journal of Psychiatry*, 17(6), 1-5.
  22. Gonzalez, S. P., Moore, E. W. G., Newton, M., & Galli, N. A. (2016). Validity and reliability of the Connor-Davidson Resilience Scale (CD-RISC) in competitive sport. *Psychology of Sport & Exercise*, 23, 31-39.  
doi:10.1016/j.psychsport.2015.10.005
  23. Prince-Embury, S. (2013). The Connor-Davidson Resilience Scale. In S. Prince-Embury, D. H. Saklofske, S. Prince-Embury, & D. H. Saklofske (Eds.), *Resilience in children, adolescents, and adults: Translating research into practice*. (pp. 161-166). New York, NY, US: Springer Science + Business Media.
  24. Cutrona, C. E., & Russell, D. W. (1987). The provisions of social relationships and adaptation to stress. *Advances in personal relationships*, 1(1), 37-67.
  25. Moreira, J. M., & Canaipa, R. (2007). A escala de provisões sociais: Desenvolvimento e validação da versão portuguesa da 'Social Provisions Scale.' =

- 1  
2  
3 Social Provision Scale, Portuguese version: Development and validation study.  
4  
5 *Revista Iberoamericana de Diagnóstico y Evaluación Psicológica*, 24(2), 23-58.  
6  
7  
8 26. Diener, E., Emmons, R. A., Larsen, R. J., & Griffin, S. (1985). The Satisfaction  
9  
10 With Life Scale. *Journal of Personality Assessment*, 49(1), 71-75.  
11  
12 doi:10.1207/s15327752jpa4901\_13  
13  
14  
15 27. Simões, A. (1992). Ulterior validação de uma escala de satisfação com a vida  
16  
17 (SWLS). *Revista Portuguesa de Pedagogia*, 26(3), 503-515.  
18  
19  
20 28. Cohen, S., Kamarck, T., & Mermelstein, R. (1983). A Global Measure of Perceived  
21  
22 Stress, 385.  
23  
24  
25 29. Cohen, S., & Williamson, G. (1988). Perceived stress in a probability sample of the  
26  
27 United States. *The social psychology of health: Claremont Symposium on applied*  
28  
29 *social psychology*. Edited by: Spacapan S, Oskamp S. 1988: Newbury Park, CA:  
30  
31 Sage.  
32  
33  
34 30. Rocha, P. (2009). Família e Trabalho: (Des)Equilíbrios que orientam a  
35  
36 (In)Satisfação. Valor do Apoio Social e da Vinculação. Tese de Mestrado em  
37  
38 Psicologia (Stress e Bem-Estar), FPCE, UL.  
39  
40  
41 31. Vaz-Serra, A. (2000). Construção de uma escala para avaliar a vulnerabilidade ao  
42  
43 Stress: a 23 QVS.  
44  
45  
46 32. Veit, C. T., & Ware, J. E. (1983). The structure of psychological distress and well-  
47  
48 being in general populations. *Journal of Consulting & Clinical Psychology*, 51, 730-  
49  
50 742. doi:10.1037/0022-006X.51.5.730  
51  
52  
53 33. Ribeiro, J. L. P. (2001). Mental Health Inventory: Um estudo de adaptação à  
54  
55 população portuguesa. *Psicologia, Saúde & Doenças*, 2(1), 77-99.  
56  
57  
58 34. Lyubomirsky, S., & Lepper, H. S. (1999). A Measure of Subjective Happiness:  
59  
60 Preliminary Reliability and Construct Validation, 137.

- 1  
2  
3 35. Pais-Ribeiro, J. L. (2012). Validação transcultural da Escala de Felicidade  
4 Subjectiva de Lyubomirsky e Lepper / Cross cultural validation of the Lyubomirsky  
5 and Lepper subjective happiness scale. *Psicologia, Saúde & Doenças*(2), 157.  
6  
7  
8  
9  
10 36. Tabachnick, B. G., & Fidell, L. S. (2007). *Using multivariate statistics*: Boston :  
11 Pearson and Allyn and Bacon. cop. 2007. 5th ed.  
12  
13  
14 37. Campbell, D. T., & Fiske, D. W. (1959). Convergent and discriminant validation by  
15 the multitrait-multimethod matrix. *Psychological Bulletin*, 56(2), 81-105.  
16  
17  
18  
19  
20  
21  
22 38. Cronbach, L. J., & Meehl, P. E. (1955). Construct validity in psychological tests.  
23  
24  
25  
26 39. Field, A. (2009). *Discovering statistics using SPSS : and sex and drugs and*  
27  
28  
29  
30  
31 40. Friedli, L., & World Health Organization. (2009). Mental health, resilience and  
32  
33  
34  
35 41. Xie, Y., Peng, L., Zuo, X., & Li, M. (2016). The Psychometric Evaluation of the  
36  
37  
38  
39  
40  
41  
42 42. Davidson, J. R. & Connor, K. M. (2017) *Connor-Davidson Resilience Scale (CD-*  
43  
44  
45  
46 43. Luszczynska, A., Gutiérrez-Doña, B., & Schwarzer, R. (2005). General self-efficacy  
47  
48  
49  
50  
51  
52  
53  
54  
55  
56 44. Bandura, A. (1997). Self-efficacy. *Harvard Mental Health Letter*, 13(9), 4.  
57  
58  
59  
60

- 1  
2  
3  
4  
5  
6  
7  
8  
9  
10  
11  
12  
13  
14  
15  
16  
17  
18  
19  
20  
21  
22  
23  
24  
25  
26  
27  
28  
29  
30  
31  
32  
33  
34  
35  
36  
37  
38  
39  
40  
41  
42  
43  
44  
45  
46  
47  
48  
49  
50  
51  
52  
53  
54  
55  
56  
57  
58  
59  
60
45. Erozkán, A., Dogan, U., & Adiguzel, A. (2016). Self-Efficacy, Self-Esteem, and Subjective Happiness of Teacher Candidates at the Pedagogical Formation Certificate Program. *Journal of Education and Training Studies*, 4(8), 72-82.
46. Martínez, C. T., & Scott, C. (2014). In Search of the Meaning of Happiness through Flow and Spirituality. *International Journal of Health, Wellness & Society*, 4(1), 37-49.
47. Etemadifar, S., Hosseiny, R. S., Ziraki, A., Omrani, A., & Alijanpoor, M. (2016). The Relationship Between Spiritual Well-Being and Life Satisfaction in Females With Infertility. *Women's Health Bull*, 3(4), e32344. doi:10.17795/whb-32344
48. Lee, D. S., & Padilla, A. M. (2016). Predicting South Korean university students' happiness through social support and efficacy beliefs. *International Journal for the Advancement of Counselling*, 38(1), 48-60. doi:10.1007/s10447-015-9255-2
49. Calvo, R., Arcaya, M., Baum, C. F., Lowe, S. R., & Waters, M. C. (2015). Happily ever after? Pre-and-post disaster determinants of happiness among survivors of Hurricane Katrina. *Journal of Happiness Studies*, 16(2), 427-442. doi:10.1007/s10902-014-9516-5
50. Brewin, C. R., Andrews, B., & Valentine, J. D. (2000). Meta-analysis of risk factors for posttraumatic stress disorder in trauma-exposed adults. *Journal of Consulting and Clinical Psychology*, 68(5), 748-766. doi:10.1037/0022-006X.68.5.748
51. Eaker, E. D. (2005). Social Support and Physical Health: Understanding the Health Consequences of Relationships. *American Journal of Epidemiology*, 161(3), 297-298. doi:10.1093/aje/kwi036
52. Arrebola-Moreno, A. L., García-Retamero, R., Catena, A., Marfil-Álvarez, R., Melgares-Moreno, R., & Ramírez-Hernández, J. A. (2014). On the protective effect

of resilience in patients with acute coronary syndrome. *International Journal of Clinical and Health Psychology*, 14(2), 111-119.

53. Kubzansky, L. D., & Thurston, R. C. (2007). Emotional vitality and incident coronary heart disease: benefits of healthy psychological functioning. *Archives of General Psychiatry*, 64(12), 1393-1401.

Table 1. Factorial weights of the 16 items on each of the three factors and respective explained variance for the RECT sample.

| Items / Explained variance | Communalities | Self-Efficacy | Spirituality | Social Support |
|----------------------------|---------------|---------------|--------------|----------------|
| 19                         | 0.44          | 0.65          | 0.05         | 0.11           |
| 24                         | 0.28          | 0.47          | 0.20         | 0.10           |
| 15                         | 0.33          | 0.57          | -0.01        | 0.08           |
| 18                         | 0.28          | 0.52          | -0.07        | 0.06           |
| 7                          | 0.35          | 0.53          | -0.01        | 0.28           |
| 8                          | 0.33          | 0.56          | 0.08         | 0.11           |
| 1                          | 0.30          | 0.52          | 0.04         | 0.14           |
| 16                         | 0.30          | 0.53          | 0.01         | 0.14           |
| 4                          | 0.40          | 0.61          | 0.14         | 0.00           |
| 6                          | 0.24          | 0.39          | 0.16         | 0.25           |
| 10                         | 0.18          | 0.35          | 0.20         | 0.11           |
| 9                          | 0.50          | 0.10          | 0.69         | 0.08           |
| 21                         | 0.45          | 0.14          | 0.60         | 0.28           |
| 3                          | 0.48          | -0.06         | 0.69         | 0.02           |

|                    |      |             |             |             |
|--------------------|------|-------------|-------------|-------------|
| 2                  | 0.38 | 0.18        | 0.13        | 0.58        |
| 13                 | 0.72 | 0.17        | 0.16        | 0.82        |
| Variance explained | -    | 20%         | 9%          | 8%          |
| Alpha              | -    | 0.82        | 0.71        | 0.53*       |
| M (SD)             | -    | 2.92 (0.54) | 2.64 (0.91) | 3.14 (0.83) |
| N                  | -    | 421         | 421         | 421         |

\* correlation for the two items,  $p < 0.05$

Table 2. Factorial weights of the 16 items on each of the three factors and respective explained variance for the HIAES sample.

| Items / Explained variance | Communalities | Self-Efficacy | Spirituality | Social Support |
|----------------------------|---------------|---------------|--------------|----------------|
| 19                         | 0.36          | 0.58          | -0.07        | 0.13           |
| 24                         | 0.33          | 0.57          | 0.02         | 0.09           |
| 15                         | 0.32          | 0.56          | -0.04        | 0.07           |
| 18                         | 0.28          | 0.52          | -0.07        | 0.07           |
| 7                          | 0.26          | 0.51          | 0.08         | 0.02           |
| 8                          | 0.24          | 0.48          | 0.04         | 0.08           |
| 1                          | 0.26          | 0.43          | 0.06         | 0.27           |
| 16                         | 0.19          | 0.43          | 0.08         | 0.04           |
| 4                          | 0.16          | 0.38          | 0.04         | 0.13           |
| 6                          | 0.12          | 0.33          | 0.12         | 0.05           |
| 10                         | 0.18          | 0.33          | 0.19         | 0.19           |
| 9                          | 0.52          | 0.08          | 0.72         | 0.00           |
| 21                         | 0.37          | 0.09          | 0.60         | 0.07           |

|                    |      |             |             |             |
|--------------------|------|-------------|-------------|-------------|
| 3                  | 0.36 | -0.06       | 0.59        | 0.13        |
| 2                  | 0.59 | 0.09        | 0.06        | 0.76        |
| 13                 | 0.35 | 0.21        | 0.14        | 0.54        |
| Variance explained | -    | 16%         | 8%          | 7%          |
| Alpha              | -    | 0.76        | 0.67        | 0.44*       |
| M (SD)             | -    | 3.03 (0.40) | 2.47 (0.84) | 3.24 (0.67) |
| N                  | -    | 405         | 405         | 405         |

\* correlation for the two items,  $p < 0.05$

Table 3. Descriptives (mean, standard-deviation and sample size) of the measures used to test the convergent validity.

|        | M     | SD   | n   |
|--------|-------|------|-----|
| SPS    | 8.75  | 9.36 | 53  |
| SWLS   | 24.72 | 5.26 | 54  |
| PSS-10 | 14.51 | 5.49 | 55  |
| 23QVS  | 28.67 | 9.44 | 55  |
| H&LS   |       |      |     |
| Phea   | 1.38  | .52  | 405 |
| Pact   | 3.14  | 1.45 | 405 |
| Mcons  | 2.58  | 1.67 | 405 |
| BI     |       |      |     |
| Met    | .12   | .32  | 260 |



|       |       |       |     |
|-------|-------|-------|-----|
| Card  | 3.31  | 2.03  | 405 |
| MHI-5 | 68.91 | 18.97 | 405 |
| SHS   | 5.24  | 1.08  | 405 |

Table 4. Bivariate correlation coefficients between the CD-RISC scale and the measures used to test the convergent validity.

|                   | 1      | 2     | 3     |
|-------------------|--------|-------|-------|
| 1. Self-Efficacy  | -      | .13** | .33** |
| 2. Spirituality   | .13**  | -     | .21** |
| 3. Social Support | .33**  | .21** | -     |
| H&LS - Phea       | -.16** | -.01  | -.09  |
| H&LS - Pact       | .08    | .00   | .08   |
| H&LS - Mcons      | -.13** | .08   | -.04  |
| BI - Met          | -.04   | .02   | -.13* |
| BI - Card         | .07    | .01   | -.10* |
| MHI-5             | .35**  | .02   | .26** |
| SHS               | .31**  | .09   | .30** |
| SPS               | .16    | -.13  | .48** |
| SWLS              | .28*   | .10   | .11   |

|        |       |                  |                   |
|--------|-------|------------------|-------------------|
| PSS-10 | -.32* | .14              | .10               |
| 23QVS  | -.34* | .25 <sup>+</sup> | -.24 <sup>+</sup> |

<sup>+</sup> p<0.06; \* p<0.05; \*\*p<0.01

For peer review only

1  
2  
3  
4  
5 Author's contribution

6  
7 Faria-Anjos, Joana

8  
9  
10 Responsible for the CD-RISC scale translation process; substantial contribution to the  
11  
12 conception and design of the work, acquisition, analysis and interpretation of data;  
13  
14 drafting the work; agreement to be accountable for all aspects of the work related with  
15  
16 integrity of the data analysis and results reporting; and final approval of the version to  
17  
18 be published.

19  
20  
21 Accountable for the following sections: Introduction, Method, Results and Discussion.  
22  
23

24  
25  
26  
27  
28 Heitor, Maria João

29  
30 Substantial contribution to the conception and design of the work, acquisition, analysis  
31  
32 and interpretation of data; drafting the work; agreement to be accountable for all aspects  
33  
34 of the work related with integrity of the data analysis and results reporting; and final  
35  
36 approval of the version to be published.

37  
38  
39 Accountable for the following sections: Introduction, Method, Results and Discussion.  
40  
41

42  
43  
44  
45  
46  
47 Ribeiro, Maria Teresa

48  
49 Substantial contribution to the conception and design of the work, acquisition, analysis  
50  
51 and interpretation of data; revising the work critically; agreement to be accountable for  
52  
53 all aspects of the work related with integrity of the data analysis and results reporting;  
54  
55 and final approval of the version to be published.

56  
57  
58 Accountable for the following sections: Introduction, Method, Results and Discussion.  
59  
60

1  
2  
3  
4  
5  
6  
7  
8 Moreira, Sérgio

9  
10 Substantial contributions to the analysis and interpretation of data for the work; drafting  
11 the work and revising it critically; agreement to be accountable for all aspects of the  
12 work related with integrity of the data analysis and results reporting; and final approval  
13 of the version to be published.  
14  
15

16  
17  
18  
19 Accountable for the following sections: Method, Results and Discussion.  
20  
21  
22  
23  
24

25 **Acknowledgments:** We thank Carla Crespo and Maria Violante Doria for their support  
26 in the CD-RISC scale translation process, and also to all the colleagues and institutions  
27 that supported us in the data collection (namely, Joana Carreiras and Susana Oliveira).  
28  
29

30 We thank Professor Jonathan Davidson for his helpful feedback throughout this process  
31 of paper construction.  
32  
33  
34  
35  
36  
37  
38  
39  
40  
41  
42  
43  
44  
45  
46  
47  
48  
49  
50  
51  
52  
53  
54  
55  
56  
57  
58  
59  
60

# BMJ Open

## Connor-Davidson Resilience Scale: Validation study in a Portuguese sample

|                                 |                                                                                                                                                                                                                                                                                                                                                                                                                                                                      |
|---------------------------------|----------------------------------------------------------------------------------------------------------------------------------------------------------------------------------------------------------------------------------------------------------------------------------------------------------------------------------------------------------------------------------------------------------------------------------------------------------------------|
| Journal:                        | <i>BMJ Open</i>                                                                                                                                                                                                                                                                                                                                                                                                                                                      |
| Manuscript ID                   | bmjopen-2018-026836.R3                                                                                                                                                                                                                                                                                                                                                                                                                                               |
| Article Type:                   | Research                                                                                                                                                                                                                                                                                                                                                                                                                                                             |
| Date Submitted by the Author:   | 14-Mar-2019                                                                                                                                                                                                                                                                                                                                                                                                                                                          |
| Complete List of Authors:       | Faria-Anjos, Joana; Universidade de Lisboa Faculdade de Psicologia, ; Instituto Nacional de Emergencia Medica IP, Heitor dos Santos, Maria; Universidade de Lisboa Faculdade de Medicina, Instituto de Medicina Preventiva e Saúde Pública & Instituto de Saúde Ambiental; Hospital Beatriz Angelo, Psiquiatria e Saúde Mental Ribeiro, Maria Teresa; Universidade de Lisboa Faculdade de Psicologia Moreira, Sergio; Universidade de Lisboa Faculdade de Psicologia |
| <b>Primary Subject Heading</b>: | Mental health                                                                                                                                                                                                                                                                                                                                                                                                                                                        |
| Secondary Subject Heading:      | Global health, Mental health                                                                                                                                                                                                                                                                                                                                                                                                                                         |
| Keywords:                       | MENTAL HEALTH, resilience, exploratory factor analysis, confirmatory factor analysis, convergent validity                                                                                                                                                                                                                                                                                                                                                            |
|                                 |                                                                                                                                                                                                                                                                                                                                                                                                                                                                      |

SCHOLARONE™  
Manuscripts

1  
2  
3  
4  
5  
6  
7 Title: Connor-Davidson Resilience Scale: Validation study in a Portuguese sample  
8  
9  
10

11 Authors:

12 Joana FARIA-ANJOS

13 Faculdade de Psicologia – Universidade de Lisboa

14 Alameda da Universidade; 1649-013 Lisboa – Portugal.

15  
16  
17 Instituto Nacional de Emergência Médica – Portugal  
18  
19

20  
21 Maria João HEITOR DOS SANTOS

22 Instituto de Medicina Preventiva e Saúde Pública & Instituto de Saúde Ambiental,

23 Faculdade de Medicina, Universidade de Lisboa, Portugal  
24

25 Departamento de Psiquiatria e Saúde Mental, Hospital Beatriz Ângelo, Loures, Portugal

26 Loures, Lisboa, 2674-514, Portugal  
27  
28  
29

30 Maria Teresa RIBEIRO

31 Faculdade de Psicologia – Universidade de Lisboa

32 Alameda da Universidade; 1649-013 Lisboa – Portugal.  
33  
34  
35

36 Sérgio MOREIRA

37 Faculdade de Psicologia – Universidade de Lisboa

38 Alameda da Universidade; 1649-013 Lisboa – Portugal.  
39  
40  
41

42 Corresponding author:

43 Joana Faria-Anjos

44 Alameda da Universidade; 1649-013 Lisboa – Portugal. E-mail:

45 joana.f.anjos@gmail.com; Phone number: +351936010735.  
46  
47  
48

49 **Key-words:** mental health; resilience; confirmatory factorial analysis; exploratory

50 factorial analysis; convergent validity.  
51  
52  
53  
54  
55

56 **Word count:** 7521 words (with references)  
57  
58  
59  
60

## Abstract

**Objective:** The objective of this paper is to evaluate the structural validity and convergent validity of the first Portuguese version of Connor- Davidson Resilience Scale (CD-RISC, 2003). **Settings:** The datasets come from two studies conducted in Portugal, respectively, from the Resilience Effect in Coping with Trauma (RECT) project and from the Health Impact Assessment of Employment Strategies (HIAES) project. **Participants:** The sample is composed by 476 participants from RECT project and 405 participants from the HIAES project. In both projects convenience samples were used. **Measures:** The original CD-RISC items were translated to Portuguese and used in a survey along with additional psychosocial and biomedical measures. **Results:** Independent Exploratory Factorial Analysis (EFA) with each of the two samples revealed that the best solution in both samples had 3 factors consistent with the Self-Efficacy, Spirituality and Social Support factors from the original scale. A Confirmatory Factor Analysis (CFA) using the two samples together and specifying the 3 factors from the EFA revealed a good overall fit and, comparatively, better fit than a model specified with the 5 factors from the original scale. The study of the convergent validity revealed that bivariate correlations between the 3 factors and validated measures of stress, life satisfaction, mental health and physical health are globally consistent with previous research. **Conclusions:** This study makes available to the broad Community of Portuguese Language Countries a validated measure of resilience extensively used for research and intervention. The results encourage future studies using this translated version of CD-RISC to explore further the three factors structure found here and to test the convergent validity with new samples.

## Article Summary

- Uses a Large sample of Portuguese participants studied with rigorous data collection protocols provide the right context to test the CD-RISC psychometric properties in the context of the Portuguese population.
- Applies sound validated data analysis methodologies (following Green and colleagues) for testing the structural validity.
- Makes available a tested (and validated by the original CD-RISC authors) translated version to the Portuguese speaking community.
- Has two different samples, requiring the adaptation of commonly used psychometric analysis.
- The two different samples also resulted in differences in test power for the convergent validity analysis.

## Funding statement

The Health Impact Assessment of Employment Strategies project (HIAES) was funded by The Office of the High Commissioner for Health followed by the General Health Direction.

## Competing interests

None declared.



## Introduction

Resilience can be described as a dynamic process of adaptively overcoming stress and adversity while maintaining normal psychological and physical functioning, and not merely the absence of psychopathology. [1] As an individual characteristic, resilience is likely influenced by external variables, such as adequate social support, that reduce risk for stress-related mental disorders by buffering the impact of stress.[2]

In a quantitative methodological review for searching, screening and appraising resilience scales quality, the Connor-Davidson Resilience Scale (CD-RISC), the Resilience Scale for Adults and the Brief Resilience Scale received the best psychometric ratings.[3]

Based on the perspective that resilience is a personal quality that reflects the ability to cope with stress, Connor and Davidson[4] developed a brief self-report scale to quantify resilience. The original version of CD-RISC has 25 self-rated items, each of them rated a 5-point scale from 0 ('not true at all') to 4 ('true nearly all the time'). Despite the absence of a proposed cut-off value, higher scores represent higher resilience. The CD-RISC was developed with participants from different settings, including the general population, primary care outpatients, psychiatric inpatients, and clinical trial patients.[4]The CD-RISC is a generic measure which can be applied to different populations since it was not developed for a specific group.[5]The original study demonstrated solid psychometric properties, with good internal consistency and test-retest reliability, with validity being demonstrated with other measures of stress and hardiness.[4] It suggested that resilience is modifiable and can improve with treatment. Further research on violent trauma showed that survivors who exhibit better health or less distress from the trauma are more resilient.[6]

1  
2  
3 The CD-RISC has been translated into over fifty languages and has been tested in  
4 several different contexts and specific populations: on general population[7-9]; post-  
5 9/11 U.S. military veteran[10]; United States Air Force[11]; adolescents[12]; university  
6 students[13,14]; young adults[15]; older adults[16]; earthquake survivors[5];  
7 adolescents' earthquake survivors[17]; homeless youth[18]; caregivers with chronic  
8 stress[19]; people with spinal cord injuries[20]; rehabilitation patients after  
9 unintentional injury[21]; sport performers[22], among many others.

10 Preliminary studies of the scale revealed that the CD-RISC has a multifactorial  
11 structure. Connor and Davidson[4] performed exploratory factor analysis, using the  
12 adults sample from general population. The factor analyses yielded 5 factors, named as  
13 *personal competence, high standards, and tenacity; trust in one's instinct, tolerance of*  
14 *negative affect and strengthening effects of stress; positive acceptance of change and*  
15 *secure relationships with others; control; spiritual influences.* Nevertheless, the CD-  
16 RISC factor structure still needs to be clarified since subsequent studies found different  
17 factor structures.

18 Prince-Embury[23] suggests that the instability of factor structure might have been  
19 related to insufficient numbers of items covering various aspects of the original  
20 construct and that factor structure differences would be expected in studies of groups  
21 that varied culturally and demographically.

22 Therefore, the objective of this study was to evaluate the psychometric properties of the  
23 CD-RISC Portuguese version with the aim of determining whether it can be used as a  
24 reliable and valid tool to assess Portuguese population resilience.

## Method

The study of CD-RISC psychometric properties and convergent validity was conducted with data sets coming from two studies.

The first data set comes from a research project on Resilience Effect in Coping with Trauma (RECT) in Portugal, conducted at the Faculty of Psychology of the University of Lisbon. This research project was reviewed by the Ethical Committee of the University of Lisbon – Faculty of Psychology and granted authorization to perform these studies. The second data set comes from a project on Health Impact Assessment of Employment Strategies (HIAES) in Portugal, which was approved by two institutional ethical committees, the Ethics Committee for Health of the National Institute of Health Doutor Ricardo Jorge, Public Institute and the Ethics Committee for Health of the Lisbon / North Hospital Center of Faculty of Medicine of the University of Lisbon. It was also approved by the National Commission of Data Protection. This research was conducted under the Helsinki declaration code of ethics. Ethics approval was obtained for the scientific use of the data in both studies. This involves the usage of the data and publication of the results in thesis and scientific journals.

## Sample

The RECT project has a convenience sample of 476 participants (44% female participants) comprised by master students, technical course of medical emergency students, and general population. Participants from the HIAES project consist of 405 workers (51% female participants) at a private mutualistic financial institution - Associação Mutualista Caixa Económica Montepio Geral (CEMG) – and is also a convenience non-probabilistic sample. Descriptive data from the two samples for general sociodemographic variables show noteworthy differences in age and education.

1  
2  
3 Regarding the age of the participants, the mean for the RECT sample was 26  
4  
5 (SD=6.24), while the HIAES project's mean was 41 (SD=8.3). Concerning the  
6  
7 education variable, the RECT project's sample was composed mostly of participants  
8  
9 with a high school degree (58%), followed by middle school (27%) and graduate or  
10  
11 higher (15%) degrees. The HIAES project's sample, however, had a higher percentage  
12  
13 of participants with a graduate or higher degree (69%), followed by high school (30%)  
14  
15 and middle school (1%) degrees.  
16  
17  
18  
19  
20  
21  
22

### 23 **Instruments**

24  
25 Besides the CD-RISC Scale, we also collected data for a set of other measures relevant  
26  
27 to each project objective. In this section we only describe the CD-RISC and the  
28  
29 measures relevant to test for convergent validity. It is important to note that different  
30  
31 data were collected in each of the samples and, also, for different groups within each  
32  
33 sample.  
34  
35  
36  
37  
38

#### 39 **Connor-Davidson Resilience Scale (CD-RISC)**

40  
41 The CD-RISC[4] is a scale developed to quantify psychological resilience and the  
42  
43 clinical effects of the treatment of anxiety and depression. It is composed by 25 items  
44  
45 measured in a 5 points scale (0 - not true to 4 - almost always true) and the original  
46  
47 study describes five factors: the notion of personal competence, high standards, and  
48  
49 tenacity; trust in one's instincts, tolerance of negative affect, and strengthening effects  
50  
51 of stress; positive acceptance of change, and secure relationships; control; and finally,  
52  
53 spiritual influences. Despite the Connor & Davidson's original study corroborating  
54  
55 these five factors, latter studies have reported support for only one factor.[5]  
56  
57  
58  
59  
60

### Additional measures

A set of additional 8 measures were collected in these two studies. More specifically, in the RECT project the following measures were collected.

- Social Provisions Scale (SPS), an instrument that measures perceived social support.[24] Here we used the Portuguese version developed by Moreira and Canaipa.[25]
- Satisfaction With Life Scale (SWLS), an instrument that measures life satisfaction based on the subjective judgement done by each person, accordingly to his own pattern of life satisfaction.[26] We used the Portuguese adaptation of the scale conducted by Simões.[27]
- Perceived Stress Scale (PSS-10), a reduced version of PSS,[28, 29] an instrument used to measure the perception of stress. We used the Portuguese adaptation of the PSS-10 described by Rocha.[30]
- Stress Vulnerability Questionnaire (23QVS), a measure of the individual's vulnerability to stress.[31]

In the HIAES project 4 additional measures were collected:

- Health and life styles (H&LS) information regarding perceived health (measured using a single item - "How would you classify your general health state during the last three months?" - and a three points Likert), the practice of physical exercise (measured using both a practice frequency and a practice quality scales) and medication consumption (measured using a dichotomous scale – yes versus no - for a set of fourteen clinical conditions).

- Biomedical indexes (BI) measured by means of blood samples, anthropometric parameters and blood pressure.
- Mental Health Inventory (MHI-5), the reduced version of the MHI Ribeiro 2001[32] that measures psychological stress and well-being using 5 items and a frequency scale of 1, always, to 6, never. Here, we used a Portuguese adaptation of the MIH-5 described by Ribeiro.[33]
- Subjective Happiness Scale (SHS), a measure of subjective happiness originally developed by Lyubomirsky and Lepper,[34] composed by four items responded on a Likert 7 points scale. Again, we used a Portuguese version described by Pais-Ribeiro.[35]

## **Procedure**

### **Translation and adaptation to the Portuguese Language**

The CD-RISC items were translated through a process of translation and back-translation from the original American scale[4] by specialists in psychology and fluent in both Portuguese and English, and finally approved by the original CD-RISC authors.

### **Survey procedure**

For the RECT data a survey was conducted between April 2009 and May 2010. The questionnaires were administered in paper and pencil format. This was done either face to face or administered in a classroom context. The CD-RISC scale was completed by 421 participants while 55 participants completed the additional convergent validity measures.

1  
2  
3 For the HIAES data a survey was conducted between November 2012 and June 2013.  
4  
5 The survey had two parts: The first part of the survey with sociodemographic  
6  
7 information and H&LS, MHI-5 and SHS scales was completed electronically while, on  
8  
9 a second part, the participants completed the Connor-Davidson Resilience Scale (CD-  
10  
11 RISC) in paper and pencil format. Additionally, for a subsample of 260, anthropometric  
12  
13 measures and blood samples were collected.  
14  
15

16  
17 All the participants, from both research projects, were informed of the investigation and  
18  
19 gave their signed informed consent. The participants were not involved in the design  
20  
21 and planning of the study.  
22  
23  
24  
25  
26  
27

### 28 **Structural validity**

29  
30 The main objective of this paper was to study the structural validity of the Portuguese  
31  
32 version of the CD-RISC. We followed Green and colleagues'[10] procedure where an  
33  
34 Exploratory Factorial Analysis (EFA) was used to test the factorial structure of the  
35  
36 original 25-item 5-factor solution version of the CD-RISC and afterwards a  
37  
38 Confirmatory Factor Analysis (CFA) was used to compare a proposed solution based on  
39  
40 the EFA results with Connor and Davidson's original one. We note that this  
41  
42 methodology used by Green and colleagues is particularly suited for our type of data.  
43  
44 More specifically, this methodology allows to understand the specific behavior of the  
45  
46 items in each of the two samples and only then to test of the factorial structure of the  
47  
48 scale with the complete sample.  
49  
50  
51  
52  
53

54 Two independent EFAs were conducted in each one of the two data sets. In this  
55  
56 analysis, the following criteria were taken into account. First, to determine the number  
57  
58 of factors we considered the criteria an eigenvalue higher than 0.7. Second, for the  
59  
60

1  
2  
3 interpretation of the items in each factor there were considered the oblimin rotated  
4 solutions once it is expected that the factors correlate among themselves. Additionally,  
5 for an item to be held for a particular factor communalities should be higher than 0.09,  
6 and loadings equal or higher to 0.32 and also cross-loadings lower to 0.32.[36] Finally,  
7 the resulting items in a factor were tested for internal consistency using Cronbach alpha.

8  
9  
10 Following the EFA, two CFAs were conducted using the complete sample to test and  
11 compare both the proposed solution as specified by EFA and the original 25-item 5-  
12 factor solution. The statistical quality of the models was assessed using two sets of  
13 measures. First, measures of the overall goodness of fit measures considering the  
14 following criteria: SRMR and RMSEA lower or equal to 0.08, Comparative Fit Index  
15 (CFI) and Tucker-Lewis Index (TLI) higher or equal to 0.90. Additionally, measures of  
16 the localized areas of strain with the following criteria: standardized residuals lower or  
17 equal to 2.58 and general modification indexes analysis lower or equal to 4.

18 Both analysis used pairwise deletion for missing data. Results were compared with a  
19 mean replacement method and no differences were found.  
20  
21  
22  
23  
24  
25  
26  
27  
28  
29  
30  
31  
32  
33  
34  
35  
36  
37  
38  
39  
40  
41  
42  
43  
44

### **Convergent validity**

45 Another aim of the present paper is to provide data for the convergent validity of the  
46 CD-RISC. The convergent validity is a form of validation that tests for the association  
47 between a construct measured by a scale and other measures that theoretically relate to  
48 this construct.[37, 38] For the convergent validity of the CD-RISC, variables used in the  
49 survey of the HIAES and RECT project were selected and bivariate correlations were  
50 computed. First, due to the sample dimension and the characteristics of the variables  
51 studied, only correlations with a p-value equal or lower than 0.01 are considered  
52  
53  
54  
55  
56  
57  
58  
59  
60



1  
2  
3 statistically significant.[39] Second, for the interpretation we considered correlation  
4  
5 values inferior to 0.20 as weak correlations, between 0.20 and 0.60 as moderate  
6  
7 correlations, and higher than 0.60 strong correlations.  
8  
9

### 10 **Patient and public involvement**

11  
12  
13 Patients and public were not involved in the conception, design or interpretation of this  
14  
15 study.  
16  
17

## 20 **Results**

### 21 **Structural validity**

#### 22 **Exploratory Factorial Analysis**

23  
24  
25  
26  
27  
28  
29  
30  
31 A first set of EFAs were conducted on each data sample forcing the 25-items to the  
32  
33 original 5-factor solution and, following Karairmak[5] and Burns and Anstey,[15] to 3-  
34  
35 factor and 1-factor solutions. The results on both data set indicated that none of the  
36  
37 solutions replicated corresponding results. In fact, the factor structure for the 5 and 3-  
38  
39 factor solutions did not hold, and for the three solutions tested several items revealed  
40  
41 low communalities, low loadings and cross loadings in both samples. In line with this,  
42  
43 items 5, 11, 12, 14, 17, 20 and 23 were excluded because of systematic problems in the  
44  
45 different solutions. A second set of EFAs were conducted with the 18-items for each  
46  
47 data sample. Once the original 5-factor and 3-factor solutions could no longer be  
48  
49 interpreted, we used the scree-plot to choose the best solution. The results on both data  
50  
51 sets showed that the best solution had 3 factors but items 22 and 25 still revealed  
52  
53 problematic. A final set of EFAs was conducted with the 16-items. Results showed that  
54  
55  
56  
57  
58  
59  
60

1  
2  
3 the best solution in both samples had 3 factors with, respectively, 37% and 31% of  
4 explained variance (  
5  
6  
7

8 Table 1  
9

10 Table 2  
11  
12  
13  
14  
15

16 and Table ). Factor 1 was the most representative factor, composed of 11 items and  
17 explained, respectively, 20% and 16% of variance, and an alpha of 0.82 and 0.76. This  
18 factor, that we labeled **Self-Efficacy**, describes individuals' beliefs about not only their  
19 personal competence while dealing with challenging demands, but also their ability to  
20 exercise control over their own functioning. Factor 2 was composed of 3 items and  
21 explained, respectively, 9% and 8% of variance, and an alpha of 0.71 and 0.67. This  
22 factor was named **Spirituality** and evaluates specific aspects of spirituality, namely the  
23 belief that life has a purpose and that spiritual forces can influence earthly events.  
24 Finally, Factor 3 was composed of 2 items and explained, respectively, 8% and 7% of  
25 variance, and an alpha of 0.53 and 0.44. This factor refers to the perceived **Social**  
26 **Support**, and evaluates how people perceive their reliance on others for emotional and  
27 functional support. We note that the alphas for Self-Efficacy and Spirituality are above  
28 0.7. Also, for the Social Support, once there were only two items, we used bivariate  
29 correlations. Here the results show a moderate association between the two items.  
30  
31  
32  
33  
34  
35  
36  
37  
38  
39  
40  
41  
42  
43  
44  
45  
46  
47  
48

49 A descriptive analysis of the three subscales show that the average results for Self-  
50 Efficacy are above the mid-point of the scale and have small standard deviations (SD)  
51 on both RECT and HIAES samples, respectively, 2.92 (SD=0.54) and 3.03 (SD=0.40).  
52 The same applies to the average results and standard deviations of the Spirituality  
53  
54  
55  
56  
57  
58  
59  
60

1  
2  
3 subscale, respectively 2.64 (SD=0.91) and 2.47 (SD=0.84), and of the Social Support  
4  
5 subscale, respectively 3.14 (SD=0.83) and 3.24 (SD=0.67).  
6  
7  
8  
9

10  
11 Table 1  
12

13  
14 Table 2  
15  
16  
17  
18  
19

### 20 **Confirmatory Factorial Analysis**

21  
22  
23 CFA was conducted to test the model specified by EFA and to compare this model with  
24  
25 the one suggested by Connor and Davidson's original five-factor solution. Considering  
26  
27 the meaning of both the proposed three factors solution and the original five-factors  
28  
29 solution, in both cases the CFAs were computed allowing for factors to correlate among  
30  
31 themselves.  
32  
33

34  
35 A preliminary analysis of the frequency distributions and statistics for skewness and  
36  
37 kurtosis of CD-RISC show severe negative asymmetry of the data in most of the 25  
38  
39 items. To reduce the impact of the data distributions on the model computations, we log  
40  
41 transformed all the data (note that the data was previously transformed to eliminate zero  
42  
43 values by adding a constant, and afterwards all the results were inverted). The  
44  
45 asymmetry of the resulting log transformed frequency distributions for the 25 items  
46  
47 were significantly reduced and consequently used in the CFA.  
48  
49

50  
51 The results for the proposed 16-item 3-factors solution reveal a good overall fit,  $\chi^2$   
52  
53 (101) = 368.64,  $p < .001$ ; SRMR = .05, RMSEA = .06 [.05, .06], CFI = .90, TLI = .89.

54  
55 The analysis also shows that few standardized residuals are higher than 2.58 and,  
56  
57  
58  
59  
60

1  
2  
3 similarly, few modification indexes are above 4. Finally, all items were highly  
4  
5 correlated with their factors, with all correlations between .40 and .77 and all  $ps < .001$ .

6  
7  
8 The results for the original 25-item 5-factor solution reveal a moderate overall fit, with  
9  
10 both CFI and TLI measures slightly below the criteria,  $\chi^2 (263) = 1219.08, p < .001$ ;  
11  
12 SRMR = .06, RMSEA = .07 [.06, .07], CFI = .82, TLI = .79. Additionally, the analysis  
13  
14 also shows several standardized residuals above the criteria and, similarly, several  
15  
16 modification indexes are above 4. All items were significantly correlated with their  
17  
18 factors (all  $ps < .001$ ), but correlations ranged between a weak .20 and strong .70.  
19  
20 Overall, the proposed 16-item 3-factors solution had better performance in the CFA.  
21  
22  
23  
24  
25  
26  
27

### 28 **Convergent validity**

29  
30 Six of the 8 measures used to test the convergent validity (i.e., SPS, SWLS, PSS-10,  
31  
32 23QVS, MHI5 and SHS) were tested for the structural validity on their unidimensional  
33  
34 versions (Table 3). Results all levels of explained variance are above 40% all Cronbach  
35  
36 alphas' above 80. The sole exception to these results is the 23QVS with a somewhat  
37  
38 lower explained variance of 23% and alpha of 0.76. Additionally, for the H&LS we  
39  
40 consider a single item on physical health (Phea) and two indexes, one on physical  
41  
42 activity (Pact) using the average of the frequency of psychical activity and of  
43  
44 commitment to the physical activity, and an index on medication consumption (Mcons),  
45  
46 consisting in the sum of the answers for medication consumption regarding 14 clinical  
47  
48 conditions. Finally, for the BI we computed an index to identify the presence of  
49  
50 metabolic syndrome (Met) using the recommendations of the European Society of  
51  
52 Cardiology (ESC, <http://www.escardio.org>) and an index for cardiovascular risk (Card)  
53  
54 based on the norms of the Portuguese Society of Cardiology (SPC, [www.spc.pt](http://www.spc.pt)).  
55  
56  
57  
58  
59  
60

1  
2  
3 Table 3  
4

5  
6 Table 4  
7  
8  
9

10 Bivariate correlations were computed between each one of the three subscales,  
11 computed based on the 16-items in the CD-RISC, and each of the 8 measures described  
12 above and used to test the convergent validity (Table. 4. Bivariate correlation  
13 coefficients between the CD-RISC scale and the measures used to test the convergent  
14 validity.  
15  
16  
17  
18  
19  
20  
21

22 ). The self-efficacy factor showed a significant negative association with the two  
23 measures of stress considered - perceived stress ( $r=-0.32$ ) and vulnerability to stress ( $r=-$   
24  $0.34$ ). There were positive correlations between the self-efficacy factor and two  
25 additional variables, namely, subjective happiness ( $r=0.31$ ) and mental health ( $r=0.35$ ).  
26 Although moderately, the self-efficacy factor as a significant and negative correlation  
27 with physical health ( $r=-0.17$ ) and medication consumption ( $r=-0.13$ )<sup>1</sup>.  
28  
29  
30  
31  
32  
33  
34  
35

36 The spirituality factor showed only a marginal significant correlation with the  
37 vulnerability to stress measure ( $r=0.25$ ).  
38  
39  
40  
41

42 The social support factor showed a moderate significant correlation ( $r=0.48$ ) with the  
43 Social Provision Scale.[24] The social support factor is also correlated with the SHS  
44 ( $r=0.30$ ) and MHI5 ( $r=0.26$ ) scales. There were a marginal significant negative  
45 correlation between social support and vulnerability to stress ( $r=-0.24$ ). The social  
46 support factor correlates significantly with metabolic syndrome ( $r=-0.13$ ) and  
47 cardiovascular risk ( $r=-0.10$ ), although the magnitude of both correlations is weak.  
48  
49  
50  
51  
52  
53  
54  
55  
56  
57

58  
59  
60  

---

<sup>1</sup> “Note that physical health is measured using a single item where the higher the value the lower the physical health reported”.

## Discussion

The objective of this paper is to evaluate the structural validity and convergent validity of the first Portuguese version of the CD-RISC. Despite the importance of this construct, to date, there is no validated scale to measure resilience in the Community of Portuguese Language Countries (CPLP, n.d.), estimated to be more than two hundred and seventy million people. Resilience is a fundamental element of mental health, health assets, capabilities and positive adaptation. It enables people both to cope with adversity and to reach their full potential, and influences a wide range of outcomes at individual and community level, including healthier lifestyles, better physical health, improved recovery from illness, fewer limitations in daily living, higher educational attainment, greater productivity, employment and earnings, better relationships with adults and with children, more social cohesion and engagement and improved quality of life.[40] It is not a surprise that resilience has been extensively measured and used to understand individual and social phenomena.

The results do not replicate the original five factors structure, instead, the results suggest a three factors structure with self-efficacy, spirituality, and social support dimensions represented. Although this result is not consistent with the original proposal from Connor and Davidson, it is consistent with more recent studies.[5, 41] Consistent with this, the variability of factor structures found in CD-RISC has been documented and owed to methodological variations, idiosyncratic samples and, importantly, to cross-cultural factors.[42] We also note that similarly to the original study and to some of the following research, self-efficacy is the factor that explains the greatest variance of the original items. Still, although the results are important to understand the construct of resilience and how CD-RISC works as an instrument measuring this construct in a

1  
2  
3 Portuguese sample, we note that the resulting scale should not be regarded as an  
4 improved version. In fact, we consider that improved usage of this scale would come  
5 from prior testing of the factorial structure of the original 25 items and comparison with  
6 the results of this paper and alike.  
7  
8  
9

10  
11  
12 The results from the validation are, with one sole and justifiable exception, consistent  
13 with evidence from the literature. The negative association we found between the self-  
14 efficacy factor and the measures of stress is consistent with the idea that people with  
15 high efficacy beliefs are able overcome obstacles and focus on opportunities, and are  
16 more able to perceive stressful situations as challenging rather than as problematic  
17 events.[43] The positive correlations between self-efficacy and happiness and  
18 satisfaction with life are consistent with the findings in the literature where self-efficacy  
19 beliefs may regulate positive and negative emotions. In this sense, people with higher  
20 self-efficacy beliefs are less distressed and feel more capable of dealing with the  
21 problematic situations.[44] Recent studies have found that self-efficacy is indeed  
22 positively correlated with happiness[45] and satisfaction with life.[43] Although  
23 moderately, the negative correlation between the self-efficacy factor and the measures  
24 of physical health and medication consumption constitute an extension of the findings  
25 where self-efficacy is associated with increased health and life satisfaction.  
26  
27  
28  
29  
30  
31  
32  
33  
34  
35  
36  
37  
38  
39  
40  
41  
42  
43  
44

45 The positive correlation we found between the spiritual factor and the vulnerability to  
46 stress is consistent with Connor and colleagues[6] study with survivors of violent trauma,  
47 where spirituality is proposed as a coping strategy do deal with higher Posttraumatic  
48 Stress Disorder scores. Still, the fact that spirituality does not relate with any other  
49 variables is not consistent with the literature, where previous studies have successfully  
50 established correlations between spirituality and happiness[46] and spirituality and life  
51 satisfaction.[47] The absence of effects can be a result of the low statistical power due  
52  
53  
54  
55  
56  
57  
58  
59  
60

1  
2  
3 to the small sample size in the RECT sample. In fact, a post hoc power analysis showed  
4  
5 that the power to detect a significant correlation of 0.20 at 0.05 in our sample is only  
6  
7  
8 0.28.  
9

10 Interestingly, the positive correlation we found between the social support and the  
11  
12 Social Provision Scale [24] is the only significant correlation of the Social Provision  
13  
14 Scale, which supports the assumptions that this factor is a specific dimension of  
15  
16 resilience. The positive correlations we found between the social support factor and the  
17  
18 SHS and MH15 scales are consistent with the findings in the literature showing the  
19  
20 strong impact of social support on happiness especially from closer social circles.[48]  
21  
22 For instance, in a study with survivors from a natural disaster, the authors found that  
23  
24 pre-disaster happiness and post-disaster social support were protective against the  
25  
26 negative effect of the hurricane on survivors' post-disaster happiness.[49] The negative  
27  
28 correlation we found between social support and vulnerability to stress is consistent  
29  
30 with the findings in the literature, in which is becoming increasingly consensual that the  
31  
32 lack of social support is an important risk factor in dealing with stressful and adverse  
33  
34 life events.[50] We found negative correlations between social support and metabolic  
35  
36 syndrome and cardiovascular risk Although some of the literature describes a  
37  
38 conflicting relation between social support and physical health,[51] it appears that social  
39  
40 support is negatively associated with cardiovascular death and that it protects against  
41  
42 recurrent events, the existing research involving the predictive relation between social  
43  
44 support/social networks and incidence of disease, specifically cardiovascular disease.  
45  
46  
47  
48  
49  
50  
51  
52 In summary, regarding the self-efficacy factor, we found associations with perceived  
53  
54 stress, vulnerability to stress, subjective happiness and mental health. Additionally, we  
55  
56 also found associations with perceived physical health and medication consumption,  
57  
58 what we consider to be an extension of the findings relating self-efficacy with health  
59  
60



1  
2  
3 and life satisfaction. Regarding the spirituality factor, we found only an association with  
4  
5 vulnerability to stress. This result is not consistent with the literature where spirituality  
6  
7 has been related with stress, happiness and life satisfaction. As mentioned, the absence  
8  
9 of effects here are likely due to low test power. Finally, regarding the social support  
10  
11 scale, we found association with the Social Provision Scale, subjective happiness,  
12  
13 mental health and vulnerability to stress. Additionally, we also found an association  
14  
15 with the two biomedical indexes used, specifically, cardiovascular risk and metabolic  
16  
17 syndrome. Resilience, through its self-efficacy component, showed a protective effect  
18  
19 on the extent of the myocardial infarction, by affecting the inflammatory  
20  
21 response.[52] Emotional vitality, as part of healthy psychological functioning, may  
22  
23 protect against risk of coronary heart disease (CHD).[53] Resilience could have life-  
24  
25 saving effects. Prevention and intervention in CHD must involve not only measures to  
26  
27 reduce psychological distress but should also focus on promoting positive emotions.  
28  
29  
30  
31  
32  
33  
34  
35  
36

### 37 **Applications for the Portuguese version of the CD-RISC**

38  
39 Our study extends the literature that has provided support on the importance of the  
40  
41 construct of resilience, and, more particularly, on the use of CD-RISC as a reliable  
42  
43 measure of this construct. In fact, using a robust psychometric method we replicated  
44  
45 more recent studies describing three main dimensions of resilience. Additionally, using  
46  
47 a vast array of validated measures we also showed how these factors are associated with  
48  
49 scales, indexes and even behavioral measures in a way that is consistent with the  
50  
51 literature. Importantly, these associations support the distinctiveness of the three factors,  
52  
53 with different factors relating, as expected, with some different convergent measures.  
54  
55 Take for instance the strong correlation between the social support factor and the Social  
56  
57 Provision Scale, and the stronger correlations between the self-efficacy factor and both  
58  
59  
60

1  
2  
3 stress and vulnerability to stress. A curious finding here is the specific association of  
4 self-efficacy with physical health and medication consumption and the association of  
5 social support with two biomedical indexes, cardiovascular risk and metabolic  
6 syndrome.  
7  
8  
9  
10  
11  
12

### 13 Future directions and research limitations

14  
15 Our study extends the possibility to measure and investigate resilience in Portuguese  
16 communities using a rigorously validated scale. Future studies with this community can  
17 explore further the three factors structure of the CD-RISC and test for the convergent  
18 validity with new samples. A limitation of the current paper is the difference in test  
19 power between the two samples used to do the convergent validity. This is particularly  
20 important because the low test power sample (from RECT project) included important  
21 and unique validation measures and because the spirituality scale did not replicate  
22 entirely the findings in the literature. Finally, and considering both research and  
23 practice, future studies with the Portuguese communities can follow the factorial  
24 structure found and validated. These studies can, again, provide additional support to  
25 the theoretical and practical relevance of resilience and its dimensions as measured by  
26 the CD-RISC.  
27  
28  
29  
30  
31  
32  
33  
34  
35  
36  
37  
38  
39  
40  
41  
42  
43  
44  
45  
46  
47  
48  
49  
50  
51  
52  
53  
54  
55  
56  
57  
58  
59  
60

### 46 **Data sharing**

47  
48  
49 The data that support the findings of this study are openly available in figshare at  
50 <https://doi.org/10.6084/m9.figshare.7111676.v1>.  
51  
52  
53  
54  
55

### 56 **Author's contribution**

57  
58 Faria-Anjos, Joana  
59  
60

1  
2  
3 Responsible for the CD-RISC scale translation process; substantial contribution to the  
4 conception and design of the work, acquisition, analysis and interpretation of data;  
5  
6 drafting the work; agreement to be accountable for all aspects of the work related with  
7  
8 integrity of the data analysis and results reporting; and final approval of the version to  
9  
10 be published.  
11  
12

13  
14 Accountable for the following sections: Introduction, Method, Results and Discussion.  
15  
16

17  
18  
19 Heitor, Maria João  
20

21 Substantial contribution to the conception and design of the work, acquisition, analysis  
22 and interpretation of data; drafting the work; agreement to be accountable for all aspects  
23 of the work related with integrity of the data analysis and results reporting; and final  
24 approval of the version to be published.  
25  
26

27  
28 Accountable for the following sections: Introduction, Method, Results and Discussion.  
29  
30  
31

32  
33  
34  
35  
36  
37 Ribeiro, Maria Teresa  
38

39 Substantial contribution to the conception and design of the work, acquisition, analysis  
40 and interpretation of data; revising the work critically; agreement to be accountable for  
41 all aspects of the work related with integrity of the data analysis and results reporting;  
42 and final approval of the version to be published.  
43  
44

45  
46 Accountable for the following sections: Introduction, Method, Results and Discussion.  
47  
48  
49

50  
51  
52  
53  
54  
55  
56 Moreira, Sérgio  
57  
58  
59  
60

1  
2  
3 Substantial contributions to the analysis and interpretation of data for the work; drafting  
4 the work and revising it critically; agreement to be accountable for all aspects of the  
5 work related with integrity of the data analysis and results reporting; and final approval  
6 of the version to be published.  
7  
8  
9

10  
11  
12 Accountable for the following sections: Method, Results and Discussion.  
13  
14  
15  
16

17  
18 **Acknowledgments:** We thank Carla Crespo and Maria Violante Doria for their support  
19 in the CD-RISC scale translation process, and also to all the colleagues and institutions  
20 that supported us in the data collection (namely, Joana Carreiras and Susana Oliveira).  
21  
22 We thank Professor Jonathan Davidson for his helpful feedback throughout this process  
23 of paper construction.  
24  
25  
26  
27  
28  
29  
30  
31  
32

### 33 **Abbreviations:**

34  
35 23QVS: Stress Vulnerability Questionnaire  
36  
37

38 BI: Biomedical indexes  
39  
40

41 Card: cardiovascular risk  
42  
43

44 CD-RISC: Connor- Davidson Resilience Scale  
45  
46

47 CFA: Confirmatory Factor Analysis  
48  
49

50 CHD: Coronary heart disease  
51  
52

53 EFA: Exploratory Factorial Analysis  
54  
55

56 H&LS: Health and life styles  
57  
58

59 HIAES: Health Impact Assessment of Employment Strategies  
60

1  
2  
3 Mcons: Medication consumption  
4  
5

6 Met: metabolic syndrome  
7  
8

9 MHI-5: Mental Health Inventory  
10  
11

12 RECT: Resilience Effect in Coping with Trauma  
13  
14

15 Pact: Physical activity  
16  
17

18 Phea: Physical health  
19  
20

21 PSS-10: Reduced version of Perceived Stress Scale  
22  
23

24 SHS: Subjective Happiness Scale (SHS),  
25  
26

27 SPS: Social Provisions Scale  
28  
29  
30  
31  
32  
33

### 34 **References**

- 35  
36  
37  
38 1. Rutten, B. P., Hammels, C., Geschwind, N., Menne-Lothmann, C., Pishva, E.,  
39 Schruers, K., . . . Wichers, M. (2013). Resilience in mental health: linking  
40 psychological and neurobiological perspectives. *Acta Psychiatr Scand*, 128(1), 3-20.  
41 doi:10.1111/acps.12095  
42  
43  
44  
45  
46  
47 2. McCrory, E., De Brito, S. A., & Viding, E. (2010). Research review: the  
48 neurobiology and genetics of maltreatment and adversity. *J Child Psychol*  
49 *Psychiatry*, 51(10), 1079-1095. doi:10.1111/j.1469-7610.2010.02271.x  
50  
51  
52  
53  
54 3. Windle, G., Bennett, K. M., & Noyes, J. (2011). A methodological review of  
55 resilience measurement scales. *Health Qual Life Outcomes*, 9, 8. doi:10.1186/1477-  
56 7525-9-8  
57  
58  
59  
60

- 1  
2  
3 4. Connor, K. M., & Davidson, J. R. (2003). Development of a new resilience scale:  
4 the Connor-Davidson Resilience Scale (CD-RISC). *Depress Anxiety, 18*(2), 76-82.  
5  
6 doi:10.1002/da.10113  
7  
8
- 9  
10 5. Karairmak, Ö. (2010). Establishing the psychometric qualities of the Connor–  
11 Davidson Resilience Scale (CD-RISC) using exploratory and confirmatory factor  
12 analysis in a trauma survivor sample. *Psychiatry Research, 179*(3), 350-356.  
13  
14 doi:10.1016/j.psychres.2009.09.012  
15  
16
- 17 6. Connor, K. M., Davidson, J. R., & Lee, L.-C. (2003). Spirituality, Resilience, and  
18 Anger in Survivors of Violent Trauma: A Community Survey. *Journal of Traumatic*  
19 *Stress, 16*(5), 487.  
20  
21
- 22 7. González, V. B. A., Sierra, M. T. C., Martínez, B. A., Martínez-Molina, A., &  
23 Ponce, F. P. (2015). An in-depth psychometric analysis of the Connor-Davidson  
24 Resilience Scale: calibration with Rasch-Andrich model. *Health & Quality of Life*  
25 *Outcomes, 13*(1), 1-12. doi:10.1186/s12955-015-0345-y  
26  
27
- 28 8. Jung, Y.-E., Min, J.-A., Shin, A. Y., Han, S. Y., Lee, K.-U., Kim, T.-S., . . . Chae,  
29 J.-H. (2012). The Korean Version of the Connor-Davidson Resilience Scale: An  
30 Extended Validation. *Stress & Health: Journal of the International Society for the*  
31 *Investigation of Stress, 28*(4), 319-326. doi:10.1002/smi.1436  
32  
33
- 34 9. Liu, D., Fairweather-Schmidt, A., Burns, R., & Roberts, R. (2015). The Connor-  
35 Davidson Resilience Scale: Establishing Invariance Between Gender Across the  
36 Lifespan in a Large Community Based Study. *Journal of Psychopathology &*  
37 *Behavioral Assessment, 37*(2), 340.  
38  
39
- 40 10. Green, K. T., Hayward, L. C., Williams, A. M., Dennis, P. A., Bryan, B. C., Taber,  
41 K. H., MIRECC Working Group, Davidson, J.R.T., Beckham, J.C., Calhoun, P.C.  
42 (2014). Examining the Factor Structure of the Connor–Davidson Resilience Scale  
43  
44  
45  
46  
47  
48  
49  
50  
51  
52  
53  
54  
55  
56  
57  
58  
59  
60

- (CD-RISC) in a Post-9/11 US Military Veteran Sample. *Assessment*, 21(4), 443–451. doi:10.1177/1073191114524014
11. Bezdjian, S., Schneider, K. G., Burchett, D., Baker, M. T., & Garb, H. N. (2016). Resilience in the United States Air Force: Psychometric Properties of the Connor-Davidson Resilience Scale (CD-RISC). *Psychological Assessment*. doi:10.1037/pas0000370
12. Jørgensen, I. E., & Seedat, S. (2008). Factor structure of the Connor-Davidson Resilience Scale in South African adolescents. *International Journal of Adolescent Medicine and Health*, 20(1), 23-32. doi:10.1515/IJAMH.2008.20.1.23
13. Di Fabio, A., & Palazzeschi, L. (2012). Connor-Davidson Resilience Scale: Psychometric properties of the Italian version. = Connor-Davidson Resilience Scale: proprietà psicometriche della versione Italiana. *Counseling: Giornale Italiano di Ricerca e Applicazioni*, 5(1), 101-109.
14. Khoshouei, M. S. k. m. y. c. (2009). Psychometric Evaluation of the Connor-Davidson Resilience Scale (CD-RISC) Using Iranian Students. *International Journal of Testing*, 9(1), 60-66. doi:10.1080/15305050902733471
15. Burns, R. A., & Anstey, K. J. (2010). The Connor–Davidson Resilience Scale (CD-RISC): Testing the invariance of a uni-dimensional resilience measure that is independent of positive and negative affect. *Personality and Individual Differences*, 48(5), 527-531. doi:10.1016/j.paid.2009.11.026
16. Serrano-Parra, M. D., Garrido-Abejar, M., Notario-Pacheco, B., Bartolomé-Gutierrez, R., Solera-Martínez, M., & Martínez-Vizcaino, V. (2012). Validez de la escala de Resiliencia de Connor-Davidson (CD-RISC) en una población de mayores entre 60 y 75 años. *Validity of the Connor Davidson Resilience scale (CD-RISC) in people from 60-to-75 years old.*, 5(2), 49-57.

- 1  
2  
3  
4  
5  
6  
7  
8  
9  
10  
11  
12  
13  
14  
15  
16  
17  
18  
19  
20  
21  
22  
23  
24  
25  
26  
27  
28  
29  
30  
31  
32  
33  
34  
35  
36  
37  
38  
39  
40  
41  
42  
43  
44  
45  
46  
47  
48  
49  
50  
51  
52  
53  
54  
55  
56  
57  
58  
59  
60
17. Yu, X.-n., Lau, J. T. F., Mak, W. W. S., Zhang, J., Lui, W. W. S., & Zhang, J. (2011). Factor structure and psychometric properties of the Connor-Davidson Resilience Scale among Chinese adolescents. *Comprehensive Psychiatry*, *52*(2), 218-224. doi:10.1016/j.comppsy.2010.05.010
  18. Asante, K. O., & Meyer-Weitz, A. (2014). Measuring resilience among homeless youth: Psychometric assessment of the Connor-Davidson Resilience Scale in Ghana. *Journal of Psychology in Africa*, *24*(4), 321-326.
  19. Crespo, M., Fernández-Lansac, V., & Soberón, C. (2014). Adaptación Española de la 'Escala de resiliencia de Connor-Davidson' (CD-RISC) en situaciones de estrés crónico. = Spanish version of the Connor-Davidson Resilience Scale (CD-RISC) for chronic stress situations. *Behavioral Psychology / Psicología Conductual: Revista Internacional Clínica y de la Salud*, *22*(2), 219-238.
  20. Fujikawa, M., Lee, E.-J., Chan, F., Catalano, D., Hunter, C., Bengtson, K., & Rahimi, M. (2013). The Connor-Davidson Resilience Scale as a Positive Psychology Measure for People with Spinal Cord Injuries. *Rehabilitation Research, Policy, and Education*, *27*(3), 213-222.
  21. Peng, L., Zhang, J., Chen, H., Zhang, Y., Li, M., Yu, Y., & Liu, B. (2014). Comparison among different versions of Connor-Davidson Resilience Scale (CD-RISC) in rehabilitation patients after unintentional injury. *African Journal of Psychiatry*, *17*(6), 1-5.
  22. Gonzalez, S. P., Moore, E. W. G., Newton, M., & Galli, N. A. (2016). Validity and reliability of the Connor-Davidson Resilience Scale (CD-RISC) in competitive sport. *Psychology of Sport & Exercise*, *23*, 31-39.  
doi:10.1016/j.psychsport.2015.10.005
  23. Prince-Embury, S. (2013). The Connor-Davidson Resilience Scale. In S. Prince-Embury, D. H. Saklofske, S. Prince-Embury, & D. H. Saklofske (Eds.), *Resilience*



- 1  
2  
3 *in children, adolescents, and adults: Translating research into practice.* (pp. 161-  
4 166). New York, NY, US: Springer Science + Business Media.  
5  
6  
7  
8 24. Cutrona, C. E., & Russell, D. W. (1987). The provisions of social relationships and  
9 adaptation to stress. *Advances in personal relationships*, 1(1), 37-67.  
10  
11  
12 25. Moreira, J. M., & Canaipa, R. (2007). A escala de provisões sociais:  
13 Desenvolvimento e validação da versão portuguesa da 'Social Provisions Scale.' =  
14 Social Provision Scale, Portuguese version: Development and validation study.  
15 *Revista Iberoamericana de Diagnóstico y Evaluación Psicológica*, 24(2), 23-58.  
16  
17  
18 26. Diener, E., Emmons, R. A., Larsen, R. J., & Griffin, S. (1985). The Satisfaction  
19 With Life Scale. *Journal of Personality Assessment*, 49(1), 71-75.  
20  
21  
22 doi:10.1207/s15327752jpa4901\_13  
23  
24  
25  
26  
27  
28 27. Simões, A. (1992). Ulterior validação de uma escala de satisfação com a vida  
29 (SWLS). *Revista Portuguesa de Pedagogia*, 26(3), 503-515.  
30  
31  
32  
33 28. Cohen, S., Kamarck, T., & Mermelstein, R. (1983). A Global Measure of Perceived  
34 Stress, 385.  
35  
36  
37 29. Cohen, S., & Williamson, G. (1988). Perceived stress in a probability sample of the  
38 United States. *The social psychology of health: Claremont Symposium on applied*  
39 *social psychology*. Edited by: Spacapan S, Oskamp S. 1988: Newbury Park, CA:  
40 Sage.  
41  
42  
43  
44  
45  
46 30. Rocha, P. (2009). Família e Trabalho: (Des)Equilíbrios que orientam a  
47 (In)Satisfação. Valor do Apoio Social e da Vinculação. Tese de Mestrado em  
48 Psicologia (Stress e Bem-Estar), FPCE, UL.  
49  
50  
51  
52  
53 31. Vaz-Serra, A. (2000). Construção de uma escala para avaliar a vulnerabilidade ao  
54 Stress: a 23 QVS.  
55  
56  
57  
58  
59  
60

- 1  
2  
3 32. Veit, C. T., & Ware, J. E. (1983). The structure of psychological distress and well-  
4 being in general populations. *Journal of Consulting & Clinical Psychology*, *51*, 730-  
5 742. doi:10.1037/0022-006X.51.5.730  
6  
7  
8  
9  
10 33. Ribeiro, J. L. P. (2001). Mental Health Inventory: Um estudo de adaptação à  
11 população portuguesa. *Psicologia, Saúde & Doenças*, *2*(1), 77-99.  
12  
13  
14 34. Lyubomirsky, S., & Lepper, H. S. (1999). A Measure of Subjective Happiness:  
15 Preliminary Reliability and Construct Validation, 137.  
16  
17  
18 35. Pais-Ribeiro, J. L. (2012). Validação transcultural da Escala de Felicidade  
19 Subjectiva de Lyubomirsky e Lepper / Cross cultural validation of the Lyubomirsky  
20 and Lepper subjective happiness scale. *Psicologia, Saúde & Doenças*(2), 157.  
21  
22  
23  
24 36. Tabachnick, B. G., & Fidell, L. S. (2007). *Using multivariate statistics*: Boston :  
25 Pearson and Allyn and Bacon. cop. 2007. 5th ed.  
26  
27  
28  
29 37. Campbell, D. T., & Fiske, D. W. (1959). Convergent and discriminant validation by  
30 the multitrait-multimethod matrix. *Psychological Bulletin*, *56*(2), 81-105.  
31  
32  
33  
34  
35  
36  
37  
38 38. Cronbach, L. J., & Meehl, P. E. (1955). Construct validity in psychological tests.  
39  
40  
41  
42  
43 39. Field, A. (2009). *Discovering statistics using SPSS : and sex and drugs and*  
44  
45  
46  
47  
48 40. Friedli, L., & World Health Organization. (2009). Mental health, resilience and  
49  
50  
51  
52  
53 41. Xie, Y., Peng, L., Zuo, X., & Li, M. (2016). The Psychometric Evaluation of the  
54  
55  
56  
57  
58  
59  
60 42. Davidson, J. R. & Connor, K. M. (2017) *Connor-Davidson Resilience Scale (CD-  
RISC) Manual*. Unpublished and partly accessible at [www.cd-risc.com](http://www.cd-risc.com).

- 1  
2  
3  
4  
5  
6  
7  
8  
9  
10  
11  
12  
13  
14  
15  
16  
17  
18  
19  
20  
21  
22  
23  
24  
25  
26  
27  
28  
29  
30  
31  
32  
33  
34  
35  
36  
37  
38  
39  
40  
41  
42  
43  
44  
45  
46  
47  
48  
49  
50  
51  
52  
53  
54  
55  
56  
57  
58  
59  
60
43. Luszczynska, A., Gutiérrez-Doña, B., & Schwarzer, R. (2005). General self-efficacy in various domains of human functioning: Evidence from five countries. *International Journal of Psychology, 40*(2), 80-89. doi:10.1080/00207590444000041
44. Bandura, A. (1997). Self-efficacy. *Harvard Mental Health Letter, 13*(9), 4.
45. Erozkan, A., Dogan, U., & Adiguzel, A. (2016). Self-Efficacy, Self-Esteem, and Subjective Happiness of Teacher Candidates at the Pedagogical Formation Certificate Program. *Journal of Education and Training Studies, 4*(8), 72-82.
46. Martinez, C. T., & Scott, C. (2014). In Search of the Meaning of Happiness through Flow and Spirituality. *International Journal of Health, Wellness & Society, 4*(1), 37-49.
47. Etemadifar, S., Hosseiny, R. S., Ziraki, A., Omrani, A., & Alijanpoor, M. (2016). The Relationship Between Spiritual Well-Being and Life Satisfaction in Females With Infertility. *Women's Health Bull, 3*(4), e32344. doi:10.17795/whb-32344
48. Lee, D. S., & Padilla, A. M. (2016). Predicting South Korean university students' happiness through social support and efficacy beliefs. *International Journal for the Advancement of Counselling, 38*(1), 48-60. doi:10.1007/s10447-015-9255-2
49. Calvo, R., Arcaya, M., Baum, C. F., Lowe, S. R., & Waters, M. C. (2015). Happily ever after? Pre-and-post disaster determinants of happiness among survivors of Hurricane Katrina. *Journal of Happiness Studies, 16*(2), 427-442. doi:10.1007/s10902-014-9516-5
50. Brewin, C. R., Andrews, B., & Valentine, J. D. (2000). Meta-analysis of risk factors for posttraumatic stress disorder in trauma-exposed adults. *Journal of Consulting and Clinical Psychology, 68*(5), 748-766. doi:10.1037/0022-006X.68.5.748

- 1  
2  
3 51. Eaker, E. D. (2005). Social Support and Physical Health: Understanding the Health  
4  
5 Consequences of Relationships. *American Journal of Epidemiology*, *161*(3), 297-  
6  
7 298. doi:10.1093/aje/kwi036  
8  
9
- 10 52. Arrebola-Moreno, A. L., Garcia-Retamero, R., Catena, A., Marfil-Álvarez, R.,  
11  
12 Melgares-Moreno, R., & Ramírez-Hernández, J. A. (2014). On the protective effect  
13  
14 of resilience in patients with acute coronary syndrome. *International Journal of*  
15  
16 *Clinical and Health Psychology*, *14*(2), 111-119.  
17  
18
- 19 53. Kubzansky, L. D., & Thurston, R. C. (2007). Emotional vitality and incident  
20  
21 coronary heart disease: benefits of healthy psychological functioning. *Archives of*  
22  
23 *General Psychiatry*, *64*(12), 1393-1401.  
24  
25  
26  
27  
28  
29  
30  
31  
32  
33

34 Table 1. Factorial weights of the 16 items on each of the three factors and respective  
35 explained variance for the RECT sample.  
36  
37  
38

| Items / Explained variance | Communalities | Self-Efficacy | Spirituality | Social Support |
|----------------------------|---------------|---------------|--------------|----------------|
| 19                         | 0.44          | 0.65          | 0.05         | 0.11           |
| 24                         | 0.28          | 0.47          | 0.20         | 0.10           |
| 15                         | 0.33          | 0.57          | -0.01        | 0.08           |
| 18                         | 0.28          | 0.52          | -0.07        | 0.06           |
| 7                          | 0.35          | 0.53          | -0.01        | 0.28           |
| 8                          | 0.33          | 0.56          | 0.08         | 0.11           |
| 1                          | 0.30          | 0.52          | 0.04         | 0.14           |
| 16                         | 0.30          | 0.53          | 0.01         | 0.14           |

|                    |      |             |             |             |
|--------------------|------|-------------|-------------|-------------|
| 4                  | 0.40 | 0.61        | 0.14        | 0.00        |
| 6                  | 0.24 | 0.39        | 0.16        | 0.25        |
| 10                 | 0.18 | 0.35        | 0.20        | 0.11        |
| 9                  | 0.50 | 0.10        | 0.69        | 0.08        |
| 21                 | 0.45 | 0.14        | 0.60        | 0.28        |
| 3                  | 0.48 | -0.06       | 0.69        | 0.02        |
| 2                  | 0.38 | 0.18        | 0.13        | 0.58        |
| 13                 | 0.72 | 0.17        | 0.16        | 0.82        |
| Variance explained | -    | 20%         | 9%          | 8%          |
| Alpha              | -    | 0.82        | 0.71        | 0.53*       |
| M (SD)             | -    | 2.92 (0.54) | 2.64 (0.91) | 3.14 (0.83) |
| N                  | -    | 421         | 421         | 421         |

\* correlation for the two items,  $p < 0.05$

Table 2. Factorial weights of the 16 items on each of the three factors and respective explained variance for the HIAES sample.

| Items / Explained variance | Communalities | Self-Efficacy | Spirituality | Social Support |
|----------------------------|---------------|---------------|--------------|----------------|
| 19                         | 0.36          | 0.58          | -0.07        | 0.13           |
| 24                         | 0.33          | 0.57          | 0.02         | 0.09           |
| 15                         | 0.32          | 0.56          | -0.04        | 0.07           |
| 18                         | 0.28          | 0.52          | -0.07        | 0.07           |
| 7                          | 0.26          | 0.51          | 0.08         | 0.02           |
| 8                          | 0.24          | 0.48          | 0.04         | 0.08           |
| 1                          | 0.26          | 0.43          | 0.06         | 0.27           |

|                    |      |             |             |             |
|--------------------|------|-------------|-------------|-------------|
| 16                 | 0.19 | 0.43        | 0.08        | 0.04        |
| 4                  | 0.16 | 0.38        | 0.04        | 0.13        |
| 6                  | 0.12 | 0.33        | 0.12        | 0.05        |
| 10                 | 0.18 | 0.33        | 0.19        | 0.19        |
| 9                  | 0.52 | 0.08        | 0.72        | 0.00        |
| 21                 | 0.37 | 0.09        | 0.60        | 0.07        |
| 3                  | 0.36 | -0.06       | 0.59        | 0.13        |
| 2                  | 0.59 | 0.09        | 0.06        | 0.76        |
| 13                 | 0.35 | 0.21        | 0.14        | 0.54        |
| Variance explained | -    | 16%         | 8%          | 7%          |
| Alpha              | -    | 0.76        | 0.67        | 0.44*       |
| M (SD)             | -    | 3.03 (0.40) | 2.47 (0.84) | 3.24 (0.67) |
| N                  | -    | 405         | 405         | 405         |

\* correlation for the two items,  $p < 0.05$

Table 3. Descriptives (mean, standard-deviation and sample size) of the measures used to test the convergent validity.

|        | M     | SD   | n   |
|--------|-------|------|-----|
| SPS    | 8.75  | 9.36 | 53  |
| SWLS   | 24.72 | 5.26 | 54  |
| PSS-10 | 14.51 | 5.49 | 55  |
| 23QVS  | 28.67 | 9.44 | 55  |
| H&LS   |       |      |     |
| Phea   | 1.38  | .52  | 405 |

|       |       |       |     |
|-------|-------|-------|-----|
| Pact  | 3.14  | 1.45  | 405 |
| Mcons | 2.58  | 1.67  | 405 |
| BI    |       |       |     |
| Met   | .12   | .32   | 260 |
| Card  | 3.31  | 2.03  | 405 |
| MHI-5 | 68.91 | 18.97 | 405 |
| SHS   | 5.24  | 1.08  | 405 |

Table 4. Bivariate correlation coefficients between the CD-RISC scale and the measures used to test the convergent validity.

|                   | 1      | 2     | 3     |
|-------------------|--------|-------|-------|
| 1. Self-Efficacy  | -      | .13** | .33** |
| 2. Spirituality   | .13**  | -     | .21** |
| 3. Social Support | .33**  | .21** | -     |
| H&LS - Phea       | -.16** | -.01  | -.09  |
| H&LS - Pact       | .08    | .00   | .08   |
| H&LS - Mcons      | -.13** | .08   | -.04  |
| BI - Met          | -.04   | .02   | -.13* |

|           |       |                  |                   |
|-----------|-------|------------------|-------------------|
| BI - Card | .07   | .01              | -.10*             |
| MHI-5     | .35** | .02              | .26**             |
| SHS       | .31** | .09              | .30**             |
| SPS       | .16   | -.13             | .48**             |
| SWLS      | .28*  | .10              | .11               |
| PSS-10    | -.32* | .14              | .10               |
| 23QVS     | -.34* | .25 <sup>+</sup> | -.24 <sup>+</sup> |

<sup>+</sup> p<0.06; \* p<0.05; \*\*p<0.01
